# Supplementary material for: Addition of ArSSAr to dienes via intramolecular C–C bond formation initiated by a catalytic amount of ArS+
Source: Royal Society of Chemistry journal article supplement (doi:10.1039/b910821a), 2009-01-01

## Supporting Information

### Addition of ArSSAr to Dienes via Intramolecular C-C Bond Formation Initiated by a Catalytic Amount of ArS<sup>+</sup>

Kouichi Matsumoto, Shunsuke Fujie, Seiji Suga, Toshiki Nokami and  
Jun-ichi Yoshida\*

*Department of Synthetic Chemistry and Biological Chemistry, Graduate School of Engineering,  
Kyoto University, Nishikyo-ku, Kyoto 615-8510, Japan.*

#### General Remarks.

GC analysis was performed on a SHIMADZU GC-2014 gas chromatograph equipped with a flame ionization detector and a fused silica capillary column (column, CBPI; 0.25mm x 25 m). <sup>1</sup>H and <sup>13</sup>C NMR spectra were recorded in CDCl<sub>3</sub> on Varian MERCURY plus-400 (<sup>1</sup>H 400 MHz, <sup>13</sup>C 100 MHz) or JEOL ECA-600P (<sup>1</sup>H 600 MHz, <sup>13</sup>C 150 MHz) spectrometer with Me<sub>4</sub>Si as an internal standard unless otherwise noted. EI mass spectra were recorded on JMS-SX102A spectrometer. FAB mass spectra were recorded on JMX-HX110A spectrometer. Thin-layer chromatography (TLC) was carried out by using Merck precoated silica gel F<sub>254</sub> plates (thickness 0.25 mm). Flash chromatography was carried out on a column of silica gel (Kanto Chem. Co., Silica Gel N, spherical, neutral, 40-100 μm). Gel permeation chromatography (GPC) was carried out on Japan Analytical Industry LC-908 equipped with JAIGEL-1H and 2H using CHCl<sub>3</sub> as eluent. High performance liquid chromatography (HPLC) was carried out on Shimadu LC-10 equipped with YMC 12S05-2520WT and SL12S05-2546WT. All reactions were carried out under Ar atmosphere unless otherwise noted.

#### Materials.

Bu<sub>4</sub>NB(C<sub>6</sub>F<sub>5</sub>)<sub>4</sub> was prepared from Bu<sub>4</sub>NBr (35.1 g, 109 mmol) and aqueous solution of NaB(C<sub>6</sub>F<sub>5</sub>)<sub>4</sub> (10 wt%, 499 g, 71.1 mmol) in water (100 mL). The mixture was diluted with EtOAc and was washed with water. After drying over MgSO<sub>4</sub> and removal of solvent, the precipitate was recrystallized from CHCl<sub>3</sub>/hexane and was dried at 50 °C/1 mmHg overnight to give Bu<sub>4</sub>NB(C<sub>6</sub>F<sub>5</sub>)<sub>4</sub> (65.1 g, 70.6 mmol, 99%). Dichloromethane was washed with water, distilled from P<sub>2</sub>O<sub>5</sub>, redistilled from dried K<sub>2</sub>CO<sub>3</sub> to remove a trace amount of acid, and was stored over molecular sieves 4A. ArSSAr (Ar = *p*-FC<sub>6</sub>H<sub>4</sub>) was prepared according to the procedure in the literature,<sup>1</sup> and was identified by the comparison of its spectral data with that of authentic sample.<sup>2</sup> ArSSAr (Ar = *p*-MeOC<sub>6</sub>H<sub>4</sub>) was prepared according to the procedure in the literature<sup>1</sup>: TLC *R*<sub>f</sub> 0.33 (hexane/EtOAc 10:1); <sup>1</sup>H NMR (400 MHz, CDCl<sub>3</sub>) δ 3.79 (s, 6H), 6.80-6.85 (m, 4H), 7.36-7.42 (m, 4H); <sup>13</sup>C NMR (100 MHz, CDCl<sub>3</sub>) δ 55.3, 114.6, 128.4, 132.6, 159.9; LRMS (EI) *m/z* 278 (M<sup>+</sup>), 139 (M<sup>+</sup>-S(*p*-MeOC<sub>6</sub>H<sub>4</sub>)); HRMS (EI) calcd for C<sub>14</sub>H<sub>14</sub>O<sub>2</sub>S<sub>2</sub> (M<sup>+</sup>) 278.0435, found 278.0436.

## Synthesis of Dienes.

### (4,4,7-Trimethylocta-1,6-dienyl)benzene (**3a**).

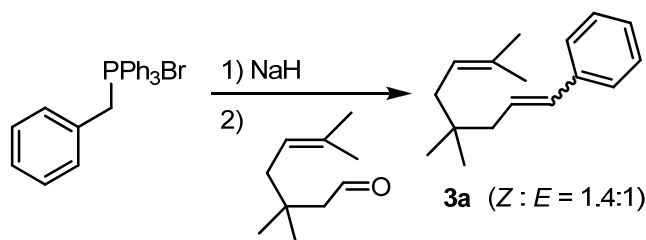

3,3,6-trimethylhept-5-enal was prepared according to the procedure in the literature<sup>3</sup>: TLC  $R_f$  0.37 (hexane/EtOAc 20:1); <sup>1</sup>H NMR (400 MHz, CDCl<sub>3</sub>)  $\delta$  1.05 (s, 6H), 1.59 (s, 3H), 1.73 (d,  $J = 1.2$  Hz, 3H), 2.01 (d,  $J = 7.6$  Hz, 2H), 2.24 (d,  $J = 3.2$  Hz, 2H), 5.15-5.22 (m, 1H), 9.83 (t,  $J = 3.2$  Hz, 1H); <sup>13</sup>C NMR (100 MHz, CDCl<sub>3</sub>)  $\delta$  17.9, 26.0, 27.4, 34.7, 40.9, 54.5, 120.0, 134.3, 203.7; LRMS (EI)  $m/z$  153 ( $M^+ - H$ ); HRMS (EI) calcd for C<sub>10</sub>H<sub>18</sub>O ( $M^+$ ) 154.1358, found 154.1362.

To a solution of benzyltriphenylphosphonium bromide (6.91 g, 16 mmol) in DMF (40 mL) was added NaH (55% in oil, 693 mg, 16 mmol) at 0 °C. The mixture was stirred at 0 °C for 2 h. Then 3,3,6-trimethylhept-5-enal (811 mg, 5.3 mmol) in DMF (20 mL) was added slowly, and the mixture was stirred at room temperature for 3 h. The reaction mixture was partitioned between ether and saturated brine. The organic phase was separated and washed with saturated brine and dried over MgSO<sub>4</sub>. After removal of the solvent, the crude product was purified via flash chromatography (hexane) followed by GPC to give the title compound (**3a**) (769 mg, 3.4 mmol, 64%). This compound was obtained as a mixture of *E/Z* isomers ( $Z : E = 1.4:1$  by <sup>1</sup>H NMR analysis): TLC  $R_f$  0.54 (hexane); <sup>1</sup>H NMR (400 MHz, CDCl<sub>3</sub>)  $\delta$  0.88 (s, 6H, *Z* isomer), 0.90 (s, 6H, *E* isomer), 1.57 (s, 3H, *Z* isomer), 1.61 (s, 3H, *E* isomer), 1.66 (d,  $J = 1.2$  Hz, 3H, *Z* isomer), 1.74 (d,  $J = 1.2$  Hz, 3H, *E* isomer), 1.90 (d,  $J = 7.6$  Hz, 2H, *Z* isomer), 1.93 (d,  $J = 7.6$  Hz, 2H, *E* isomer), 2.09 (dd,  $J = 7.6, 1.2$  Hz, 2H, *E* isomer), 2.25 (dd,  $J = 7.6, 2.0$  Hz, 2H, *Z* isomer), 5.08-5.14 (m, 1H, *Z* isomer), 5.19-5.26 (m, 1H, *E* isomer), 5.76 (dt,  $J = 12.0, 7.6$  Hz, 1H, *Z* isomer), 6.25 (dt,  $J = 15.6, 7.6$  Hz, 1H, *E* isomer), 6.36 (d,  $J = 15.6$  Hz, 1H, *E* isomer), 6.49 (dt,  $J = 12.0, 2.0$  Hz, 1H, *Z* isomer), 7.16-7.37 (m, 5H); <sup>13</sup>C NMR (150 MHz, CDCl<sub>3</sub>)  $\delta$  17.9 and 18.0, 26.0 and 26.1, 26.8 and 26.9, 34.8 and 35.1, 39.9 and 40.0, 40.2 and 45.4, 121.10 and 121.14, 126.0 and 128.0, 126.3 and 128.5, 126.8 and 128.8, 128.1 and 129.7, 130.0 and 131.9, 132.88 and 132.92, 138.0 and 138.0; LRMS (EI)  $m/z$  228 ( $M^+$ ), 159 ( $M^+ - CH_2CH=C(CH_3)_2$ ), 111 ( $M^+ - CH_2CH=CHPh$ ); HRMS (EI) calcd for C<sub>17</sub>H<sub>24</sub> ( $M^+$ ) 228.1878, found 228.1878.

### (4,4,7-Trimethylocta-1,6-dienyl)benzene (**3b**).

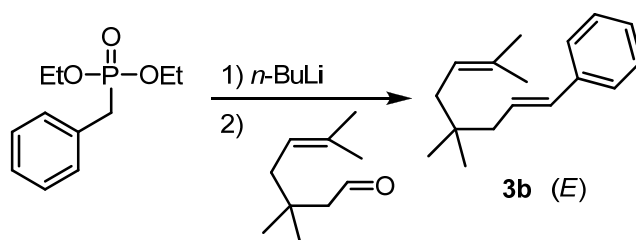

To a solution of diethylbenzylphosphonate (24.3 g, 106.5 mmol) in THF (200 mL) was added *n*-BuLi (1.65 M in hexane, 67 mL, 110.6 mmol) at -78 °C. The mixture was stirred at -78 °C for 1 h and then the solution of 3,3,6-trimethylhept-5-enal (1.26 g, 8.2 mmol) in THF (20 mL) was added slowly. The mixture was warmed gradually to room temperature and was stirred for 3.5 h. The reaction mixture was partitioned between ether and saturated aqueous NaHCO<sub>3</sub>. The organic phase was separated and washed with saturated brine and dried over MgSO<sub>4</sub>. After removal of the solvent, the crude product was purified via flash chromatography (hexane) followed by GPC to give the title compound (**3b**) (819.1 mg, 3.6 mmol, 44%, purity ca. 98% by GC analysis): TLC *R*<sub>f</sub> 0.54 (hexane); <sup>1</sup>H NMR (600 MHz, CDCl<sub>3</sub>) δ 0.89 (s, 6H), 1.61 (s, 3H), 1.74 (d, *J* = 1.1 Hz, 3H), 1.93 (d, *J* = 7.6 Hz, 2H), 2.09 (dd, *J* = 7.6, 1.0 Hz, 2H), 5.20-5.25 (m, 1H), 6.25 (dt, *J* = 15.8, 7.6 Hz, 1H), 6.36 (d, *J* = 15.8 Hz, 1H), 7.16-7.36 (m, 5H); <sup>13</sup>C NMR (150 MHz, CDCl<sub>3</sub>) δ 18.0, 26.1, 26.9, 35.1, 40.2, 45.4, 121.1, 126.0, 126.8, 128.0, 128.5, 131.9, 132.9, 138.0; LRMS (EI) *m/z* 228 (M<sup>+</sup>); HRMS (EI) calcd for C<sub>17</sub>H<sub>24</sub> (M<sup>+</sup>) 228.1878, found 228.1880.

### 1-Methyl-4-(4,4,7-trimethylocta-1,6-dienyl)benzene (**3c**).

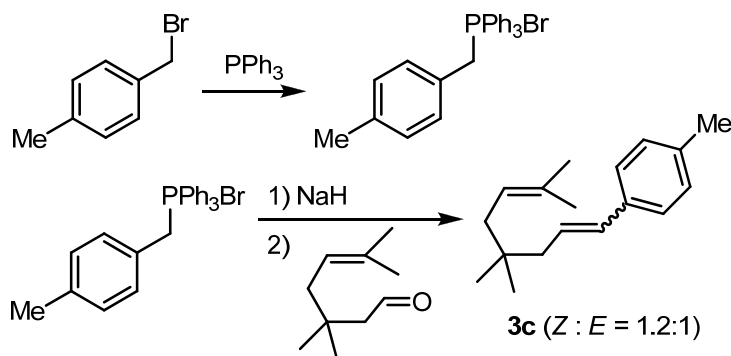

To a solution of *p*-methylbenzyl bromide (9.5 g, 51.3 mmol) in CH<sub>3</sub>CN (100 mL) was added triphenylphosphine (13.5 g, 51.5 mmol). Then the mixture was stirred at reflux condition over night. The removal of the solvent gave *p*-methylbenzyltriphenylphosphonium bromide (21.8 g, 48.7 mmol, ca. 95%), and this material was used for the subsequent reaction without further purification. To a solution of *p*-methylbenzyltriphenylphosphonium bromide (7.0 g, ca. 15.6 mmol) in DMF (80 mL) was added NaH (55% in oil, 749 mg, 17.2 mmol) at 0 °C. The mixture was stirred at 0 °C for 2.5 h. Then, 3,3,6-trimethylhept-5-enal (925 mg, 6.0 mmol) in DMF (18 mL)

was added slowly, and the mixture was stirred at room temperature over night. The reaction mixture was partitioned between ether and saturated brine. The organic phase was separated and washed with saturated brine and dried over MgSO<sub>4</sub>. After removal of the solvent, the crude product was purified via flash chromatography (hexane) followed by GPC to give the title compound (**3c**) (980 mg, 4.0 mmol, 67%). This compound was obtained as a mixture of *E/Z* isomers (*Z* : *E* = 1.2:1 by <sup>1</sup>H NMR analysis): TLC R<sub>f</sub> 0.36 (hexane); <sup>1</sup>H NMR (600 MHz, CDCl<sub>3</sub>) δ 0.87 (s, 6H, *Z* isomer), 0.89 (s, 6H, *E* isomer), 1.58 (s, 3H, *Z* isomer), 1.60 (s, 3H, *E* isomer), 1.67 (s, 3H, *Z* isomer), 1.73 (s, 3H, *E* isomer), 1.91 (t, *J* = 8.9 Hz, 2H, *E* and *Z* isomers), 2.08 (d, *J* = 7.6 Hz, 2H, *E* isomer), 2.24 (dd, *J* = 7.3, 1.7 Hz, 2H, *Z* isomer), 2.32 (s, 3H, *E* isomer), 2.34 (s, 3H, *Z* isomer), 5.10-5.14 (m, 1H, *Z* isomer), 5.20-5.24 (m, 1H, *E* isomer), 5.71 (dt, *J* = 11.7, 7.3 Hz, 1H, *Z* isomer), 6.19 (dt, *J* = 15.5, 7.6 Hz, 1H, *E* isomer), 6.32 (d, *J* = 15.5 Hz, 1H, *E* isomer), 6.45 (d, *J* = 11.7 Hz, 1H, *Z* isomer), 7.09-7.26 (m, 5H, *E* and *Z* isomers); <sup>13</sup>C NMR (150 MHz, CDCl<sub>3</sub>): δ 17.9 and 18.0, 21.12 and 21.16, 26.0 and 26.1, 26.8 and 26.9, 34.8 and 35.1, 39.98 and 40.0, 40.2 and 45.4, 121.16 and 121.20, 125.9 and 127.0, 128.7 and 128.8, 129.1 and 129.2, 129.8 and 131.7, 132.8 and 132.9, 135.1 and 135.2, 136.0 and 136.5; LRMS (EI) *m/z* 242 (M<sup>+</sup>), 227 (M<sup>+</sup>-CH<sub>3</sub>), 173 (M<sup>+</sup>-CH<sub>2</sub>CH=C(CH<sub>3</sub>)<sub>2</sub>); HRMS (EI) calcd for C<sub>18</sub>H<sub>26</sub> (M<sup>+</sup>) 242.2035, found 242.2033.

### 1-Chloro-4-(4,4,7-trimethylocta-1,6-dienyl)benzene (**3d**).

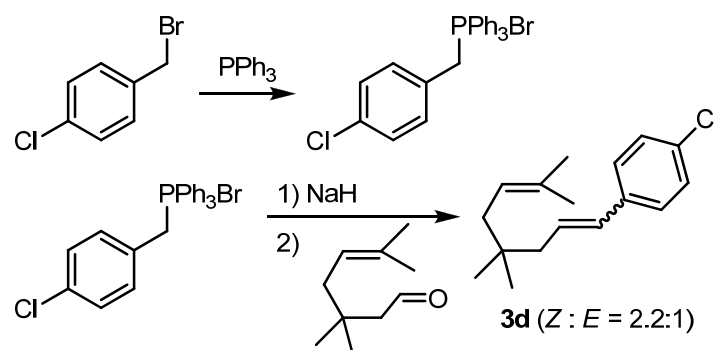

To a solution of *p*-chlorobenzylbromide (20.8 g, 101 mmol) in CH<sub>3</sub>CN (100 mL) was added triphenylphosphine (27.3 g, 104 mmol). Then the mixture was stirred at reflux condition over night. The removal of the solvent gave *p*-chlorobenzyltriphenylphosphonium bromide (45.8 g, 98 mmol, ca. 97%), and this material was used for the subsequent reaction without further purification. To a solution of *p*-chlorobenzyltriphenylphosphonium bromide (8.3 g, ca. 17.7 mmol) in DMF (70 mL) was added NaH (55% in oil, 788 mg, 18.1 mmol) at 0 °C. The mixture was stirred at 0 °C for 1.5 h. Then, 3,3,6-trimethylhept-5-enal (1.02 g, 6.6 mmol) in DMF (17 mL) was added slowly, and the mixture was stirred at room temperature over night. The reaction mixture was partitioned between ether and saturated aqueous NaHCO<sub>3</sub>. The organic phase was separated and washed with saturated aqueous NaHCO<sub>3</sub> and dried over MgSO<sub>4</sub>. After removal of the solvent, the crude product was purified via flash chromatography

(hexane) followed by GPC to give the title compound (**3d**) (1.17 g, 4.5 mmol, 68%). This compound was obtained as a mixture of *E/Z* isomers (*Z* : *E* = 2.2:1 by <sup>1</sup>H NMR analysis): TLC *R<sub>f</sub>* 0.60 (hexane); <sup>1</sup>H NMR (600 MHz, CDCl<sub>3</sub>) δ 0.87 (s, 6H, *Z* isomer), 0.90 (s, 6H, *E* isomer), 1.57 (s, 3H, *Z* isomer), 1.60 (s, 3H, *E* isomer), 1.67 (s, 3H, *Z* isomer), 1.73 (s, 3H, *E* isomer), 1.89 (d, *J* = 7.6 Hz, 2H, *Z* isomer), 1.92 (d, *J* = 7.6 Hz, 2H, *E* isomer), 2.08 (dd, *J* = 7.2, 0.7 Hz, 2H, *E* isomer), 2.19 (dd, *J* = 7.6, 1.7 Hz, 2H, *Z* isomer), 5.07-5.13 (m, 1H, *Z* isomer), 5.19-5.24 (m, 1H, *E* isomer), 5.77 (dt, *J* = 11.7, 7.6 Hz, 1H, *Z* isomer), 6.22 (dt, *J* = 15.8, 7.2 Hz, 1H, *E* isomer), 6.30 (d, *J* = 15.8 Hz, 1H, *E* isomer), 6.43 (d, *J* = 11.7 Hz, 1H, *Z* isomer), 7.18-7.29 (m, 4H); <sup>13</sup>C NMR (150 MHz, CDCl<sub>3</sub>): δ 17.9 and 18.0, 26.0 and 26.1, 26.8 and 26.9, 34.8 and 35.1, 39.87 and 39.93, 40.2 and 45.4, 120.96 and 121.03, 127.1 and 128.2, 128.6 and 130.1, 128.81 and 128.84, 130.5 and 130.7, 132.0 and 132.3, 132.97 and 133.04, 136.36 and 136.44; LRMS (EI) *m/z* 262 (*M*<sup>+</sup>), 193 (*M*<sup>+</sup>-CH<sub>2</sub>CH=C(CH<sub>3</sub>)<sub>2</sub>); HRMS (EI) calcd for C<sub>17</sub>H<sub>23</sub>Cl<sub>1</sub> (*M*<sup>+</sup>) 262.1488, found 262.1488.

### 1-Methyl-2-(4,4,7-trimethylocta-1,6-dienyl)benzene (**3e**).

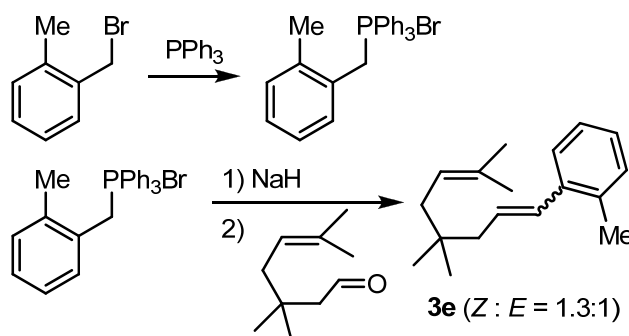

To a solution of *o*-methylbenzylbromide (20.3 g, 110 mmol) in CH<sub>3</sub>CN (100 mL) was added triphenylphosphine (28.8 g, 110 mmol). Then the mixture was stirred at reflux condition over night. The removal of the solvent gave *o*-methylbenzyltriphenylphosphonium bromide (46.4 g, 104 mmol, ca. 95%), and this material was used for the subsequent reaction without further purification. To a solution of *o*-methylbenzyltriphenylphosphonium bromide (9.0 g, ca. 20.1 mmol) in DMF (70 mL) was added NaH (55% in oil, 915 mg, 21 mmol) at 0 °C. The mixture was stirred at 0 °C for 1 h. Then, 3,3,6-trimethylhept-5-enal (933 mg, 6.0 mmol) in DMF was added slowly, and the mixture was stirred at room temperature for 5 h. The reaction mixture was partitioned between ether and saturated brine. The organic phase was separated and washed with saturated brine and dried over MgSO<sub>4</sub>. After removal of the solvent, the crude product was purified via flash chromatography (hexane) followed by GPC to give the title compound (**3e**) (1.15 g, 4.7 mmol, 78%). This compound was obtained as a mixture of *E/Z* isomers (*Z* : *E* = 1.3:1 by <sup>1</sup>H NMR analysis): TLC *R<sub>f</sub>* 0.52 (hexane); <sup>1</sup>H NMR (600 MHz, CDCl<sub>3</sub>) δ 0.82 (s, 6H, *Z* isomer), 0.91 (s, 6H, *E* isomer), 1.56 (s, 3H, *Z* isomer), 1.61 (s, 3H, *E* isomer), 1.65 (d, *J* = 1.0 Hz, 3H, *Z* isomer), 1.74 (d, *J* = 0.7 Hz,

3H, *E* isomer), 1.85 (d,  $J = 7.6$  Hz, 2H, *Z* isomer), 1.93 (d,  $J = 7.9$  Hz, 2H, *E* isomer), 2.06 (dd,  $J = 7.6, 1.7$  Hz, 2H, *Z* isomer), 2.12 (dd,  $J = 7.6, 1.0$  Hz, 2H, *E* isomer), 2.24 (s, 3H, *Z* isomer), 2.33 (s, 3H, *E* isomer), 5.02-5.18 (m, 1H, *Z* isomer), 5.20-5.27 (m, 1H, *E* isomer), 5.80 (dt,  $J = 11.7, 7.6$  Hz, 1H, *Z* isomer), 6.10 (dt,  $J = 15.4, 7.6$  Hz, 1H, *E* isomer), 6.50 (d,  $J = 11.7$  Hz, 1H, *Z* isomer), 6.54 (d,  $J = 15.4$  Hz, 1H, *E* isomer), 7.09-7.17 (m, 4H, *Z* isomer and 3H, *E* isomer), 7.41 (d,  $J = 7.6$  Hz, 1H, *E* isomer);  $^{13}\text{C}$  NMR (150 MHz,  $\text{CDCl}_3$ ):  $\delta$  17.8 and 18.0, 19.9 and 19.9, 26.0 and 26.1, 26.8 and 26.9, 34.7 and 35.0, 39.7 and 39.8, 40.3 and 45.7, 121.2 and 121.2, 125.1 and 125.1, 125.6 and 126.0, 126.6 and 126.7, 129.2 and 129.4, 129.5 and 129.6, 129.9 and 130.1, 132.7 and 132.9, 134.9 and 136.2, 137.0 and 137.3; LRMS (EI)  $m/z$  242 ( $\text{M}^+$ ), 173 ( $\text{M}^+ - \text{CH}_2\text{CH}=\text{C}(\text{CH}_3)_2$ ); HRMS (EI) calcd for  $\text{C}_{18}\text{H}_{26}$  ( $\text{M}^+$ ) 242.2035, found 242.2036.

### (7-Methylocta-1,6-dienyl)benzene (7).

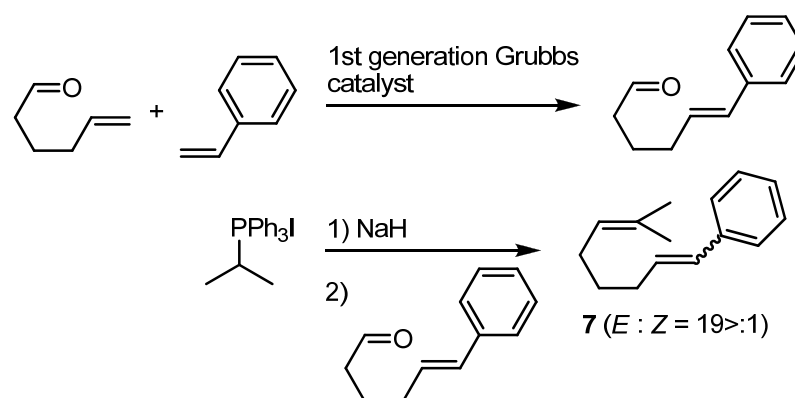

(*E*)-6-Phenyl-5-hexenal was prepared according to the procedure in the literature using 1st generation Grubbs catalyst.<sup>4</sup> To a solution of isopropyltriphenylphosphonium iodide (7.5 g, 17.3 mmol) in DMF was added NaH (55% in oil, 847 mg, 19.4 mmol) at 0 °C. The mixture was stirred at 0 °C for 1.5 h. Then, (*E*)-6-phenyl-5-hexenal (836 mg, 4.8 mmol) in DMF (20 mL) was added slowly, and the mixture was stirred at room temperature over night. The reaction mixture was partitioned between ether and saturated brine. The organic phase was separated and washed with saturated brine and dried over  $\text{MgSO}_4$ . After removal of the solvent, the crude product was purified via flash chromatography (hexane) followed by GPC to give the title compound (7) (298 mg, 1.5 mmol, 31%). This compound was obtained as a mixture of *E/Z* isomers (*E* : *Z* = 19>:1 by  $^1\text{H}$  NMR analysis): TLC  $R_f$  0.34 (hexane);  $^1\text{H}$  NMR (400 MHz,  $\text{CDCl}_3$ , *E* isomer)  $\delta$  1.51 (quintet,  $J = 7.6$  Hz, 1H), 1.61 (d,  $J = 0.4$  Hz, 3H), 1.70 (d,  $J = 1.2$  Hz, 3H), 2.03 (q,  $J = 7.6$  Hz, 1H), 2.21 (qd,  $J = 7.6, 1.2$  Hz, 1H), 5.10-5.18 (m, 1H), 6.23 (dt,  $J = 15.6, 7.6$  Hz, 1H), 6.38 (d,  $J = 15.6$  Hz, 1H), 7.16-7.22 (m, 1H), 7.24-7.36 (m, 4H);  $^{13}\text{C}$  NMR (100 MHz,  $\text{CDCl}_3$ , *E* isomer)  $\delta$  17.7, 25.8, 27.5, 29.5, 32.6, 124.4, 125.9, 126.7, 128.4, 129.8, 131.0, 131.7, 137.9; LRMS (EI)  $m/z$  200 ( $\text{M}^+$ ); HRMS (EI) calcd for  $\text{C}_{15}\text{H}_{20}$  ( $\text{M}^+$ ) 200.1565, found 200.1568.

### 2,5,5,8-Tetramethylnona-2,7-diene (**9**).

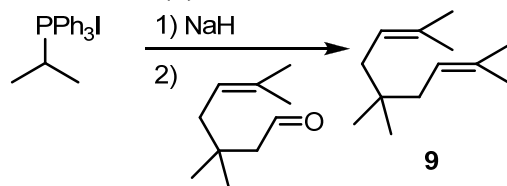

To a solution of isopropyltriphenylphosphonium iodide (5.15 g, 11.9 mmol) in DMF (23 mL) was added NaH (55% in oil, 570 mg, 13.1 mmol) at 0 °C. The mixture was stirred at 0 °C for 1.5 h. Then, 3,3,6-trimethylhept-5-enal (1.07 g, 6.9 mmol) was added slowly, and the mixture was stirred at room temperature for 0.5 h. The reaction mixture was partitioned between ether and saturated brine. The organic phase was separated and washed with saturated brine and dried over MgSO<sub>4</sub>. After removal of the solvent, the crude product was purified via flash chromatography (hexane) followed by GPC to give the title compound (**9**) (820 mg, 4.5 mmol, 65%): TLC *R<sub>f</sub>* 0.84 (hexane); <sup>1</sup>H NMR (400 MHz, CDCl<sub>3</sub>) δ 0.83 (s, 6H), 1.59 (d, *J* = 0.8 Hz, 6H), 1.72 (d, *J* = 1.2 Hz, 6H), 1.86 (d, *J* = 7.6 Hz, 4H), 5.15-5.22 (m, 2H); <sup>13</sup>C NMR (100 MHz, CDCl<sub>3</sub>) δ 17.8, 26.1, 26.7, 35.3, 40.1, 121.5, 132.5; LRMS (EI) *m/z* 180 (M<sup>+</sup>), 111 (M<sup>+</sup>-CH<sub>2</sub>CH=C(CH<sub>3</sub>)<sub>2</sub>); HRMS (EI) calcd for C<sub>13</sub>H<sub>24</sub> (M<sup>+</sup>) 180.1878, found 180.1877.

### (*E*)-1-Phenyl-(*E*)-7-phenyl-1,6-heptadiene (**11**).

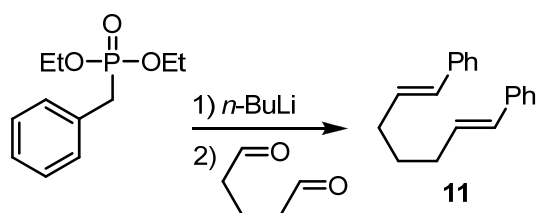

To a solution of diethylbenzylphosphonate (11.6 g, 51 mmol) in THF (120 mL) was added *n*-BuLi (1.59 M in hexane, 36 mL, 57 mmol) at -78 °C. The mixture was stirred at -78 °C for 3.5 h and then the solution of glutaraldehyde (2.13 g, 21.3 mmol) in THF (15 mL) was added slowly. The mixture was warmed gradually to room temperature and stirred for 9 h. The reaction mixture was partitioned between ether and saturated brine. The organic phase was separated, and washed with saturated brine, and dried over MgSO<sub>4</sub>. After removal of the solvent, the crude product was purified via flash chromatography (hexane/EtOAc 100:1) followed by GPC to give the title compound (**11**) (288 mg, 1.2 mmol, 6 %): TLC *R<sub>f</sub>* 0.37 (hexane/EtOAc 20:1); <sup>1</sup>H NMR (400 MHz, CDCl<sub>3</sub>) δ 1.66 (quintet, *J* = 7.6 Hz, 2H), 2.28 (qd, *J* = 7.6, 1.2 Hz, 4H), 6.24 (dt, *J* = 16.0, 7.6 Hz, 2H), 6.40 (d, *J* = 16.0 Hz, 2H), 7.16-7.22 (m, 2H), 7.25-7.37 (m, 8H); <sup>13</sup>C NMR (100 MHz, CDCl<sub>3</sub>) δ 29.0, 32.5, 125.9, 126.8, 128.5, 130.2, 130.6, 137.8; LRMS (EI) *m/z* 248 (M<sup>+</sup>); HRMS (EI) calcd for C<sub>19</sub>H<sub>20</sub> (M<sup>+</sup>) 248.1565, found 248.1568.

### A Typical Procedure for Addition of ArSSAr to (*E*)- $\beta$ -Methylstyrene Using a Catalytic Amount of ArS(ArSSAr)<sup>+</sup>.

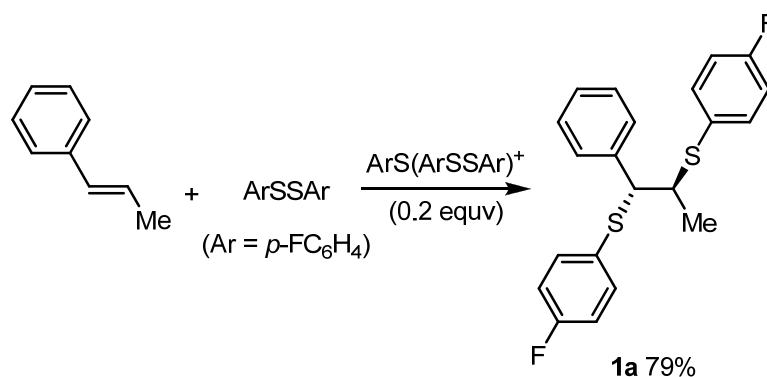

The anodic oxidation was carried out in an H-type divided cell (4G glass filter) equipped with a carbon felt anode and a platinum plate cathode (40 mm x 20 mm). In the anodic chamber was placed a solution of ArSSAr (Ar = *p*-FC<sub>6</sub>H<sub>4</sub>) (258.5 mg, 1.02 mmol) in 0.1 M Bu<sub>4</sub>NB(C<sub>6</sub>F<sub>5</sub>)<sub>4</sub>/CH<sub>2</sub>Cl<sub>2</sub> (8.0 mL). In the cathodic chamber were placed 0.1 M Bu<sub>4</sub>NB(C<sub>6</sub>F<sub>5</sub>)<sub>4</sub>/CH<sub>2</sub>Cl<sub>2</sub> (8.0 mL) and trifluoromethanesulfonic acid (15.4 mg, 0.103 mmol). The constant current electrolysis (8 mA) was carried out at -78 °C with magnetic stirring until 0.06 F/mol of electricity was consumed. After the electrolysis, the temperature in the anodic chamber containing electrogenerated ArS(ArSSAr)<sup>+</sup>B(C<sub>6</sub>F<sub>5</sub>)<sub>4</sub><sup>-</sup> (0.06 mmol) was changed at -50 °C. Then, to the anodic chamber containing electrogenerated ArS(ArSSAr)<sup>+</sup>B(C<sub>6</sub>F<sub>5</sub>)<sub>4</sub><sup>-</sup>, was added (*E*)- $\beta$ -methylstyrene (36.4 mg, 0.308 mmol) and the mixture was stirred for 0.5 h at -50 °C. The reaction was quenched with Et<sub>3</sub>N (1 mL). The solvent was removed under reduced pressure and the residue was quickly filtered through a short column (2 x 3 cm) of silica gel to remove Bu<sub>4</sub>NB(C<sub>6</sub>F<sub>5</sub>)<sub>4</sub>. The silica gel was washed with ether (150 mL). The crude product was purified via flash chromatography (hexane/EtOAc 20:1) to give 1-methyl-2-phenyl-2-(4-fluorophenylthio)ethyl(4-fluorophenyl)sulfide (**1a**) (90.8 mg, 0.244 mmol, 79%); <sup>1</sup>H NMR (400 MHz, CDCl<sub>3</sub>)  $\delta$  1.42 (d, *J* = 6.8 Hz, 3H), 3.55 (dq, *J* = 6.8, 6.8 Hz, 1H), 4.17 (d, *J* = 6.8 Hz, 1H), 6.80-6.88 (m, 2H), 6.92-7.00 (m, 2H), 7.10-7.28 (m, 7H), 7.30-7.37 (m, 2H); <sup>13</sup>C NMR (100 MHz, CDCl<sub>3</sub>)  $\delta$  19.1, 50.4, 60.7, 115.8 (d, *J* = 21.9 Hz), 116.0 (d, *J* = 21.4 Hz), 127.4, 128.2, 128.6, 129.61 (d, *J* = 3.1 Hz), 129.64 (d, *J* = 2.8 Hz), 135.0 (d, *J* = 8.0 Hz), 135.6 (d, *J* = 8.3 Hz), 139.9, 162.3 (d, *J* = 245.9 Hz), 162.5 (d, *J* = 246.4 Hz); LRMS (FAB) *m/z* 372 (M<sup>+</sup>); HRMS (FAB) calcd for C<sub>21</sub>H<sub>18</sub>F<sub>2</sub>S<sub>2</sub> (M<sup>+</sup>) 372.0818, found 372.0833.



### 1-Methyl-2-phenyl-2-(4-methoxyphenylthio)ethyl(4-methoxyphenyl)sulfide (**1b**).

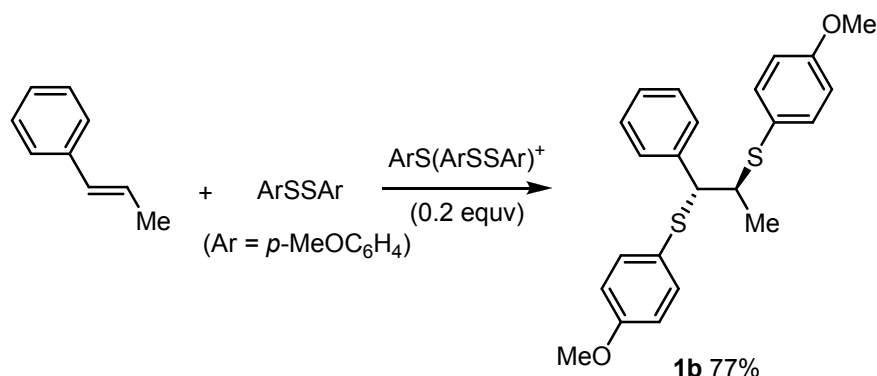

Prepared from  $\text{ArSSAr}$  ( $\text{Ar} = p\text{-MeOC}_6\text{H}_4$ ) (277.9 mg, 0.998 mmol) and (*E*)- $\beta$ -methylstyrene (36.6 mg, 0.310 mmol) with 0.06 F/mol of electricity and purified via GPC to give the title compound (**1b**) (94.9 mg, 0.239 mmol, 77%): TLC  $R_f$  0.27 (hexane/EtOAc 10:1);  $^1\text{H}$  NMR (600 MHz,  $\text{CDCl}_3$ )  $\delta$  1.41 (d,  $J = 6.8$  Hz, 3H), 3.48 (dq,  $J = 6.8, 6.8$  Hz, 1H), 3.73 (s, 3H), 3.79 (s, 3H), 4.10 (d,  $J = 6.8$  Hz, 1H), 6.66-6.70 (m, 2H), 6.78-6.82 (m, 2H), 7.10-7.14 (m, 2H), 7.17-7.26 (m, 5H), 7.30-7.34 (m, 2H);  $^{13}\text{C}$  NMR (150 MHz,  $\text{CDCl}_3$ )  $\delta$  19.2, 50.3, 55.20, 55.28, 60.9, 114.2, 114.4, 124.9, 125.0, 127.1, 128.0, 128.7, 135.3, 136.0, 140.6, 159.4, 159.6; LRMS (EI)  $m/z$  396 ( $\text{M}^+$ ), 257 ( $\text{M}^+ - \text{S}(p\text{-MeOC}_6\text{H}_4)$ ); HRMS (EI) calcd for  $\text{C}_{23}\text{H}_{24}\text{O}_2\text{S}_2$  ( $\text{M}^+$ ) 396.1218, found 396.1219.

### 1-Methyl-2-phenyl-2-(4-fluorophenylthio)ethyl(4-fluorophenyl)sulfide (**2a**).

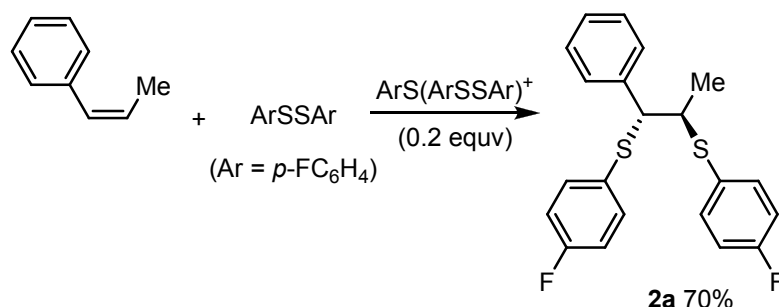

Prepared from  $\text{ArSSAr}$  ( $\text{Ar} = p\text{-FC}_6\text{H}_4$ ) (254.9 mg, 1.00 mmol) and (*Z*)- $\beta$ -methylstyrene (36.0 mg, 0.305 mmol) with 0.06 F/mol of electricity and purified via flash chromatography (hexane/EtOAc 20:1) to give the title compound (**2a**) (80.2 mg, 0.215 mmol, 70%): TLC  $R_f$  0.23 (hexane/EtOAc 20:1);  $^1\text{H}$  NMR (400 MHz,  $\text{CDCl}_3$ )  $\delta$  1.23 (d,  $J = 7.2$  Hz, 3H), 3.51 (dq,  $J = 7.2, 7.2$  Hz, 1H), 4.14 (d,  $J = 7.2$  Hz, 1H), 6.84-6.90 (m, 2H), 6.94-7.02 (m, 2H), 7.16-7.30 (m, 7H), 7.31-7.38 (m, 2H);  $^{13}\text{C}$  NMR (100 MHz,  $\text{CDCl}_3$ )  $\delta$  17.7, 48.2, 58.7, 115.9 (d,  $J = 21.4$  Hz), 116.1 (d,  $J = 21.4$  Hz), 127.6, 128.0, 129.0, 129.2 (d,  $J = 3.6$  Hz), 129.5 (d,  $J = 3.6$  Hz), 135.0 (d,  $J = 7.9$  Hz), 135.5 (d,  $J = 7.9$  Hz), 138.0, 162.4 (d,  $J = 246.4$  Hz), 162.5 (d,  $J = 246.8$  Hz); LRMS (EI)  $m/z$  372 ( $\text{M}^+$ ), 245 ( $\text{M}^+ - \text{S}(p\text{-FC}_6\text{H}_4)$ ); HRMS (EI) calcd for  $\text{C}_{21}\text{H}_{18}\text{F}_2\text{S}_2$  ( $\text{M}^+$ ) 372.0818, found 372.0815.

### 1-Methyl-2-phenyl-2-(4-methoxyphenylthio)ethyl(4-methoxyphenyl)sulfide (**2b**).

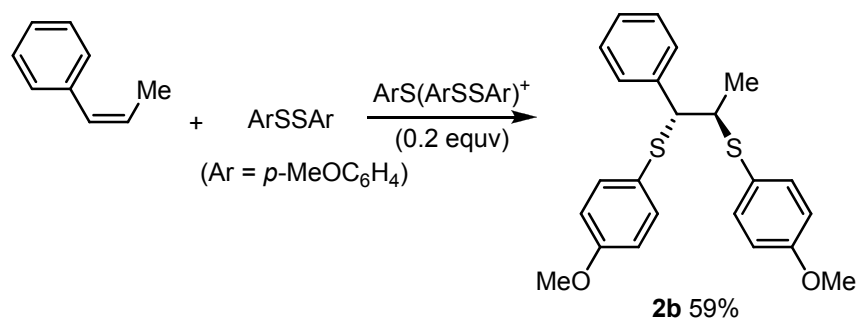

Prepared from ArSSAr (Ar = *p*-MeOC<sub>6</sub>H<sub>4</sub>) (282.4 mg, 1.01 mmol) and (*Z*)- $\beta$ -methylstyrene (34.5 mg, 0.292 mmol) with 0.06 F/mol of electricity and purified via GPC to give the title compound (**2b**) (68.0 mg, 0.171 mmol, 59%): TLC R<sub>f</sub> 0.16 (hexane/EtOAc 20:1) <sup>1</sup>H NMR (400 MHz, CDCl<sub>3</sub>)  $\delta$  1.21 (d, *J* = 6.8 Hz, 3H), 3.47 (dq, *J* = 6.8, 6.8 Hz, 1H), 3.77 (s, 3H), 3.81 (s, 3H), 4.12 (d, *J* = 6.8 Hz, 1H), 6.68-6.83 (m, 4H), 7.14-7.31 (m, 9H); <sup>13</sup>C NMR (100 MHz, CDCl<sub>3</sub>)  $\delta$  17.2, 48.0, 55.2, 55.3, 58.6, 114.3, 114.5, 124.7, 125.0, 127.3, 127.8, 129.2, 135.0, 135.6, 138.4, 159.3, 159.5; LRMS (EI) *m/z* 396 (M<sup>+</sup>); HRMS (EI) calcd for C<sub>23</sub>H<sub>24</sub>O<sub>2</sub>S<sub>2</sub> (M<sup>+</sup>) 396.1218, found 396.1218.

### A Typical Procedure for Addition of ArSSAr to Dienes via Intramolecular C-C Bond Formation Using a Catalytic Amount of ArS(ArSSAr)<sup>+</sup> (Method A).

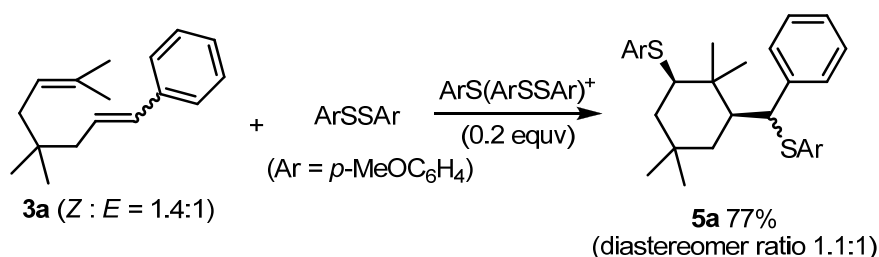

The anodic oxidation was carried out in an H-type divided cell as described above. In the anodic chamber was placed a solution of ArSSAr (Ar = *p*-MeOC<sub>6</sub>H<sub>4</sub>) (282.6 mg, 1.02 mmol mmol) in 0.1 M Bu<sub>4</sub>NB(C<sub>6</sub>F<sub>5</sub>)<sub>4</sub>/CH<sub>2</sub>Cl<sub>2</sub> (8.0 mL). In the cathodic chamber were placed 0.1 M Bu<sub>4</sub>NB(C<sub>6</sub>F<sub>5</sub>)<sub>4</sub>/CH<sub>2</sub>Cl<sub>2</sub> (8.0 mL) and trifluoromethanesulfonic acid (16.6 mg, 0.111 mmol). The constant current electrolysis (8 mA) was carried out at -78 °C with magnetic stirring until 0.06 F/mol of electricity was consumed. After the electrolysis, the temperature in the anodic chamber containing electrogenerated ArS(ArSSAr)<sup>+</sup>B(C<sub>6</sub>F<sub>5</sub>)<sub>4</sub><sup>-</sup> (0.06 mmol) was changed at 0 °C. Then, to the anodic chamber containing electrogenerated ArS(ArSSAr)<sup>+</sup>B(C<sub>6</sub>F<sub>5</sub>)<sub>4</sub><sup>-</sup>, was added (4,4,7-trimethylocta-1,6-dienyl)benzene (**3a**) (69.9 mg, 0.306 mmol), and the mixture was stirred for 0.5 h at 0 °C. The reaction was quenched with Et<sub>3</sub>N (1 mL). The solvent was removed under reduced pressure and the residue was quickly filtered through a short column (2 x 3 cm) of silica gel to remove Bu<sub>4</sub>NB(C<sub>6</sub>F<sub>5</sub>)<sub>4</sub>. The silica gel was washed with ether (150 mL). The crude product was purified via GPC to give 1-(4-methoxyphenylthio)-2,2,5,5-tetramethyl-3-(phenyl(4-methoxyphenylthio)methyl)-

cyclohexane (**5a**) (120.0 mg, 0.237 mmol, 77%). This compound was characterized as a mixture of two diastereomers (1.1:1 by  $^1\text{H}$  NMR analysis). The stereochemistry was determined by the proton-proton coupling constant and proton homonuclear NOE experiments: TLC  $R_f$  0.28 (hexane/EtOAc 10:1);  $^1\text{H}$  NMR (600 MHz,  $\text{CDCl}_3$ )  $\delta$  0.47 (s, 3H) and 1.22 (s, 3H), 0.69 (s, 3H) and 0.83 (s, 3H), 0.94 (s, 3H) and 0.97 (s, 3H), 1.33 (s, 3H) and 1.36 (s, 3H), 1.36-1.74 (m, 7H, which means mixture of two diastereomers), 1.86-1.96 (m, 3H, which means mixture of two diastereomers), 2.74 (dd,  $J = 13.0, 4.4$  Hz, 1H) and 2.80 (dd,  $J = 13.1, 4.1$  Hz, 1H), 3.71 (s, 3H) and 3.75 (s, 3H), 3.76 (s, 3H) and 3.78 (s, 3H), 4.28 (d,  $J = 2.0$  Hz, 1H) and 4.54 (d,  $J = 3.1$  Hz, 1H), 6.64-6.82 (m, 4H), 7.02-7.33 (m, 9H);  $^{13}\text{C}$  NMR (150 MHz,  $\text{CDCl}_3$ )  $\delta$  14.8 and 15.7, 24.6 and 25.1, 27.4 and 28.2, 31.7 and 31.8, 32.9 and 33.1, 36.2 and 36.6, 39.97 and 40.09, 43.8 and 44.0, 48.0 and 50.8, 55.16 and 55.21, 55.2 and 55.2, 56.2 and 56.5, 59.2 and 59.5, 114.2 and 114.3, 114.4 and 114.4, 125.9 and 126.2, 126.3 and 126.9, 127.1 and 127.3, 127.6 and 127.9, 128.1 and 129.8, 134.1 and 134.1, 134.5 and 135.5, 140.8 and 145.7, 158.8 and 158.9, 159.1 and 159.4; LRMS (EI)  $m/z$  506 ( $\text{M}^+$ ), 367 ( $\text{M}^+ - \text{S}(p\text{-MeOC}_6\text{H}_4)$ ); HRMS (EI) calcd for  $\text{C}_{31}\text{H}_{38}\text{O}_2\text{S}_2$  ( $\text{M}^+$ ) 506.2313, found 506.2318.

NOE Data for **5a**:

| 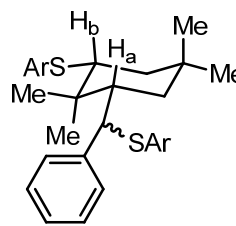 <p>(Ar = <math>p\text{-MeOC}_6\text{H}_4</math>)</p> | <table border="0"> <thead> <tr> <th style="text-align: left;">Signal Irradiated</th> <th style="text-align: left;">NOE's observed</th> </tr> </thead> <tbody> <tr> <td>H<sub>b</sub> (diastereomer 1)</td> <td>H<sub>a</sub> (8.1 %)</td> </tr> <tr> <td>H<sub>a</sub> (diastereomer 1)</td> <td>H<sub>b</sub> (5.6 %)</td> </tr> <tr> <td colspan="2" style="text-align: center;">-----</td> </tr> <tr> <td>H<sub>b</sub> (diastereomer 2)</td> <td>H<sub>a</sub> (8.5 %)</td> </tr> <tr> <td>H<sub>a</sub> (diastereomer 2)</td> <td>H<sub>b</sub> (8.9 %)</td> </tr> </tbody> </table> | Signal Irradiated | NOE's observed | H <sub>b</sub> (diastereomer 1) | H <sub>a</sub> (8.1 %) | H <sub>a</sub> (diastereomer 1) | H <sub>b</sub> (5.6 %) | ----- |  | H <sub>b</sub> (diastereomer 2) | H <sub>a</sub> (8.5 %) | H <sub>a</sub> (diastereomer 2) | H <sub>b</sub> (8.9 %) |
|------------------------------------------------------------------------------------------------------------------------------------------|-------------------------------------------------------------------------------------------------------------------------------------------------------------------------------------------------------------------------------------------------------------------------------------------------------------------------------------------------------------------------------------------------------------------------------------------------------------------------------------------------------------------------------------------------------------------------------------------|-------------------|----------------|---------------------------------|------------------------|---------------------------------|------------------------|-------|--|---------------------------------|------------------------|---------------------------------|------------------------|
| Signal Irradiated                                                                                                                        | NOE's observed                                                                                                                                                                                                                                                                                                                                                                                                                                                                                                                                                                            |                   |                |                                 |                        |                                 |                        |       |  |                                 |                        |                                 |                        |
| H <sub>b</sub> (diastereomer 1)                                                                                                          | H <sub>a</sub> (8.1 %)                                                                                                                                                                                                                                                                                                                                                                                                                                                                                                                                                                    |                   |                |                                 |                        |                                 |                        |       |  |                                 |                        |                                 |                        |
| H <sub>a</sub> (diastereomer 1)                                                                                                          | H <sub>b</sub> (5.6 %)                                                                                                                                                                                                                                                                                                                                                                                                                                                                                                                                                                    |                   |                |                                 |                        |                                 |                        |       |  |                                 |                        |                                 |                        |
| -----                                                                                                                                    |                                                                                                                                                                                                                                                                                                                                                                                                                                                                                                                                                                                           |                   |                |                                 |                        |                                 |                        |       |  |                                 |                        |                                 |                        |
| H <sub>b</sub> (diastereomer 2)                                                                                                          | H <sub>a</sub> (8.5 %)                                                                                                                                                                                                                                                                                                                                                                                                                                                                                                                                                                    |                   |                |                                 |                        |                                 |                        |       |  |                                 |                        |                                 |                        |
| H <sub>a</sub> (diastereomer 2)                                                                                                          | H <sub>b</sub> (8.9 %)                                                                                                                                                                                                                                                                                                                                                                                                                                                                                                                                                                    |                   |                |                                 |                        |                                 |                        |       |  |                                 |                        |                                 |                        |

**1-(4-Methoxyphenylthio)-2,2,5,5-tetramethyl-3-benzylcyclohexane (6): Cathodic Reduction of 1-(4-Methoxyphenylthio)-2,2,5,5-tetramethyl-3-(phenyl(4-methoxyphenylthio)methyl)cyclohexane (5a).<sup>5</sup>**

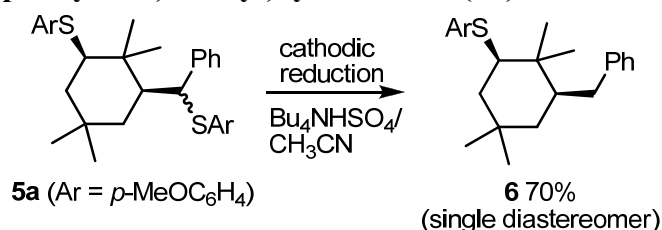

The cathodic reduction was carried out in an H-type divided cell (4G glass filter) equipped with a carbon felt cathode and a platinum plate anode (10 mm x 10 mm). In the cathodic chamber was placed a solution of 1-(4-methoxyphenylthio)-2,2,5,5-tetramethyl-3-(phenyl(4-methoxyphenylthio)methyl)cyclohexane (**5a**) (116.5 mg, 0.230 mmol, a mixture of two diastereomers) in 0.2 M  $\text{Bu}_4\text{NHSO}_4/\text{CH}_3\text{CN}$  (4.0 mL). In the anodic chamber was placed 0.2 M  $\text{Bu}_4\text{NHSO}_4/\text{CH}_3\text{CN}$  (4.0 mL). The constant current electrolysis (25 mA) was carried out

at 0 °C with magnetic stirring (5.2 F/mol of electricity) until starting material (**3a**) was consumed completely. After the electrolysis, the reaction was quenched with Et<sub>3</sub>N (1 mL). The solvent was removed under reduced pressure and the residue was quickly filtered through a short column (2 x 3 cm) of silica gel to remove Bu<sub>4</sub>NHSO<sub>4</sub>. The silica gel was washed with ether (150 mL). The crude product was purified via flash chromatography (hexane/EtOAc 90:1) and <sup>1</sup>H NMR analysis using CH<sub>2</sub>Br<sub>2</sub> as an internal standard indicated that 1-(4-methoxyphenylthio)-2,2,5,5-tetramethyl-3-benzylcyclohexane (**6**) was formed in 70 % yield as a single diastereomer: TLC R<sub>f</sub> 0.48 (hexane/EtOAc 10:1); <sup>1</sup>H NMR (600 MHz, CDCl<sub>3</sub>) δ 0.66 (s, 3H), 0.81 (s, 3H), 0.92 (s, 3H), 1.01-1.10 (m, 2H), 1.40 (s, 3H), 1.50-1.62 (m, 3H), 2.06 (dd, *J* = 13.4, 11.0 Hz, 1H), 2.93 (dd, *J* = 12.0, 5.2 Hz, 1H), 2.99 (dd, *J* = 13.4, 2.4 Hz, 1H), 3.80 (s, 3H), 6.81-6.85 (m, 2H), 7.08-7.13 (m, 2H), 7.14-7.18 (m, 1H), 7.23-7.28 (m, 2H), 7.33-7.38 (m, 2H); <sup>13</sup>C NMR (150 MHz, CDCl<sub>3</sub>) δ 14.3, 24.7, 27.7, 31.4, 32.8, 37.3, 38.6, 39.8, 44.1, 45.8, 55.3, 58.9, 114.4, 125.6, 127.5, 128.2, 128.9, 134.1, 142.0, 158.8; LRMS (EI) *m/z* 368 (M<sup>+</sup>); HRMS (EI) calcd for C<sub>24</sub>H<sub>32</sub>O<sub>1</sub>S<sub>1</sub> (M<sup>+</sup>) 368.2174, found 368.2174.

#### A Typical Procedure for Cyclization Using a Catalytic Amount of Electricity (Method B, *In-Cell Electrolysis*).

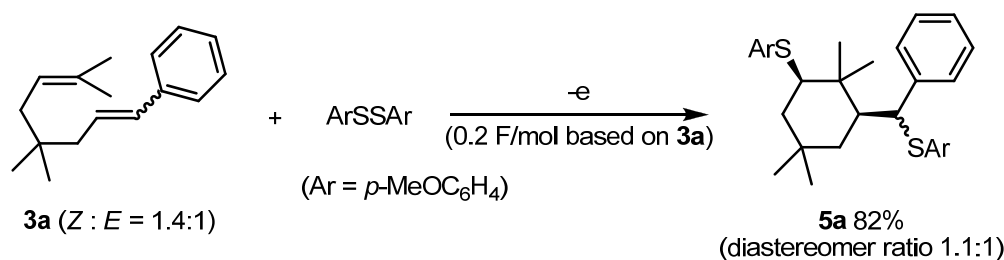

The anodic oxidation was carried out in an H-type divided cell as described above. In the anodic chamber was placed a solution of (4,4,7-trimethylocta-1,6-dienyl)benzene (**3a**) (70.1 mg, 0.307 mmol) and ArSSAr (Ar = *p*-MeOC<sub>6</sub>H<sub>4</sub>) (280.0 mg, 1.01 mmol) in 0.1 M Bu<sub>4</sub>NB(C<sub>6</sub>F<sub>5</sub>)<sub>4</sub>/CH<sub>2</sub>Cl<sub>2</sub> (8.0 mL). In the cathodic chamber were placed 0.1 M Bu<sub>4</sub>NB(C<sub>6</sub>F<sub>5</sub>)<sub>4</sub>/CH<sub>2</sub>Cl<sub>2</sub> (8.0 mL) and trifluoromethanesulfonic acid (15.0 mg, 0.10 mmol). The constant current electrolysis (8 mA) was carried out at 0 °C with magnetic stirring until 0.20 F/mol of electricity (based on **3a**) was consumed. The mixture was stirred for 0.5 h at 0 °C, and then the reaction was quenched with Et<sub>3</sub>N (1 mL). The solvent was removed under reduced pressure and the residue was quickly filtered through a short column (2 x 3 cm) of silica gel to remove Bu<sub>4</sub>NB(C<sub>6</sub>F<sub>5</sub>)<sub>4</sub>. The silica gel was washed with ether (150 mL). The crude product was purified via GPC to give **5a** (128.0 mg, 0.253 mmol, 82%). This compound was characterized as a mixture of two diastereomers (1.1:1 by <sup>1</sup>H NMR analysis).

### 1-(4-Methoxyphenylthio)-2,2,5,5-tetramethyl-3-((4-methylphenyl)(4-methoxyphenylthio)methyl)cyclohexane (5c).

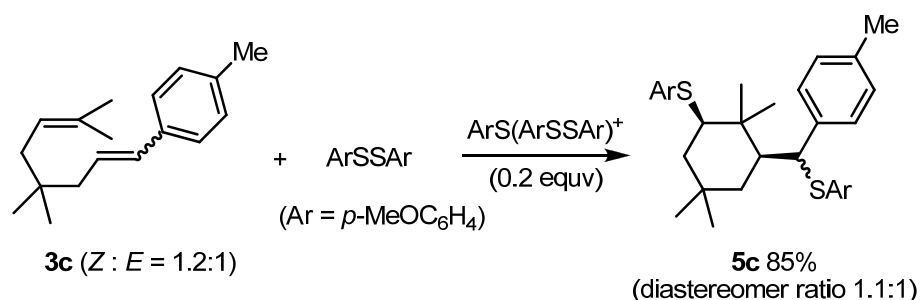

Prepared from ArSSAr (Ar = *p*-MeOC<sub>6</sub>H<sub>4</sub>) (281.4 mg, 1.01 mmol) and 1-methyl-4-(4,4,7-trimethylocta-1,6-dienyl)benzene (**3c**) (72.5 mg, 0.299 mmol) with 0.06 F/mol of electricity (method A, reaction temperature: 0 °C), and purified via GPC to give **3c** (132.6 mg, 0.255 mmol, 85%, purity ca. 95%). This compound was characterized as a mixture of two diastereomers (1.1:1 by <sup>1</sup>H NMR analysis): TLC *R<sub>f</sub>* 0.33 (hexane/EtOAc 5:1); <sup>1</sup>H NMR (600 MHz, CDCl<sub>3</sub>) δ 0.47 (s, 3H) and 1.21 (s, 3H), 0.69 (s, 3H) and 0.82 (s, 3H), 0.94 (s, 3H) and 0.96 (s, 3H), 1.30 (s, 3H) and 1.35 (s, 3H), 1.40-1.93 (m, 5H), 2.72 (dd, *J* = 12.7, 4.1 Hz, 1H) and 2.80 (dd, *J* = 13.0, 4.1 Hz, 1H), 3.71 (s, 3H) and 3.77 (s, 3H), 3.77 (s, 3H) and 3.78 (s, 3H), 4.26 (d, *J* = 1.7 Hz, 1H) and 4.54 (d, *J* = 2.8 Hz, 1H), 6.66-6.82 (m, 4H), 7.00-7.32 (m, 8H); <sup>13</sup>C NMR (150 MHz, CDCl<sub>3</sub>) δ 14.9 and 15.6, 21.0 and 21.1, 24.6 and 25.2, 27.4 and 28.2, 31.7 and 31.8, 32.9 and 33.2, 36.1 and 36.6, 39.9 and 40.1, 43.9 and 44.0, 47.9 and 51.0, 55.2 and 55.3, 55.3 and 55.3, 55.7 and 56.2, 59.3 and 59.5, 114.2 and 114.3, 114.4 and 114.4, 126.1 and 126.5, 127.2 and 127.4, 127.5 and 128.6, 128.8 and 129.6, 134.1 and 134.1, 134.3 and 135.4, 135.8 and 136.6, 137.6 and 142.7, 158.2 and 158.8, 159.0 and 159.4; LRMS (EI) *m/z* 520 (M<sup>+</sup>), 381 (M<sup>+</sup>-S(*p*-MeOC<sub>6</sub>H<sub>4</sub>)); HRMS (EI) calcd for C<sub>32</sub>H<sub>40</sub>O<sub>2</sub>S<sub>2</sub> (M<sup>+</sup>) 520.2470, found 520.2468.

### 1-(4-Methoxyphenylthio)-2,2,5,5-tetramethyl-3-((4-chlorophenyl)(4-methoxyphenylthio)methyl)cyclohexane (5d).

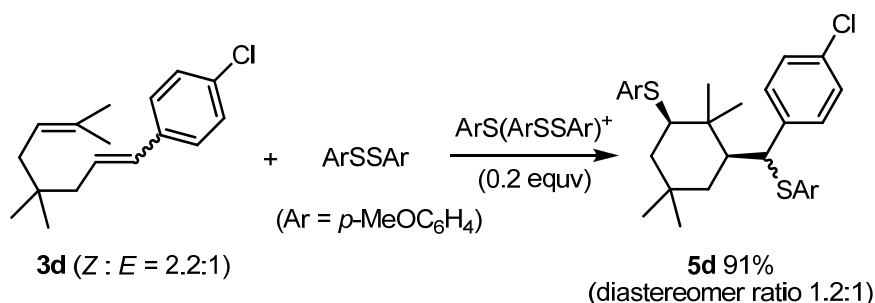

Prepared from ArSSAr (Ar = *p*-MeOC<sub>6</sub>H<sub>4</sub>) (280.2 mg, 1.01 mmol) and 1-chloro-4-(4,4,7-trimethylocta-1,6-dienyl)benzene (**3d**) (78.6 mg, 0.299 mmol) with 0.06 F/mol of electricity (method A, reaction temperature: 0 °C), and purified via GPC to give **5d** (147.6 mg, 0.273 mmol, 91%). This compound was characterized as a mixture

of two diastereomers (1.2:1 by  $^1\text{H}$  NMR analysis): TLC  $R_f$  0.38 (hexane/EtOAc 10:1);  $^1\text{H}$  NMR (600 MHz,  $\text{CDCl}_3$ )  $\delta$  0.48 (s, 3H) and 1.22 (s, 3H), 0.68 (s, 3H) and 0.84 (s, 3H), 0.94 (s, 3H) and 0.96 (s, 3H), 1.34 (s, 3H) and 1.34 (s, 3H), 1.25-1.96 (m, 5H), 2.75 (dd,  $J = 13.1, 4.1$  Hz, 1H) and 2.79 (dd,  $J = 13.1, 4.1$  Hz, 1H), 3.72 (s, 3H) and 3.76 (s, 3H), 3.77 (s, 3H) and 3.78 (s, 3H), 4.25 (d,  $J = 2.0$  Hz, 1H) and 4.48 (d,  $J = 3.1$  Hz, 1H), 6.66-6.82 (m, 4H), 7.03-7.33 (m, 8H);  $^{13}\text{C}$  NMR (150 MHz,  $\text{CDCl}_3$ )  $\delta$  15.0 and 15.7, 24.6 and 25.1, 27.5 and 28.3, 31.7 and 31.8, 32.9 and 33.1, 36.4 and 36.5, 40.0 and 40.1, 43.8 and 43.9, 48.0 and 50.9, 55.19 and 55.23, 55.2 and 55.2, 55.5 and 56.0, 59.2 and 59.4, 114.3 and 114.4, 114.5 and 114.5, 125.4 and 125.7, 127.0 and 127.2, 128.0 and 128.3, 129.0 and 131.1, 131.9 and 132.6, 134.2 and 134.2, 134.6 and 135.5, 139.5 and 144.2, 158.88 and 158.90, 159.2 and 159.6; LRMS (EI)  $m/z$  540 ( $\text{M}^+$ ), 401 ( $\text{M}^+ - \text{S}(p\text{-MeOC}_6\text{H}_4)$ ); HRMS (EI) calcd for  $\text{C}_{31}\text{H}_{37}\text{Cl}_1\text{O}_2\text{S}_2$  ( $\text{M}^+$ ) 540.1923, found 540.1923.

**1-(4-Methoxyphenylthio)-2,2,5,5-tetramethyl-3-((2-methylphenyl)(4-methoxyphenylthio)methyl)cyclohexane (5e).**

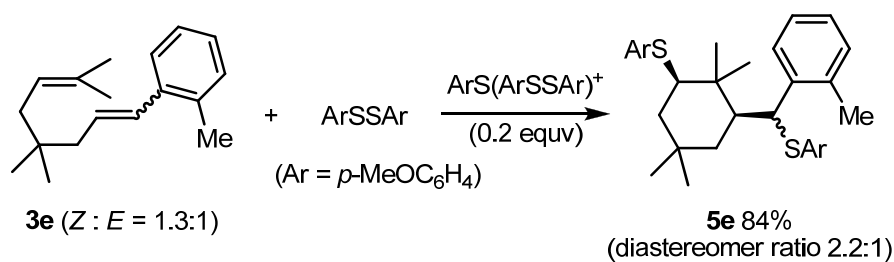

Prepared from  $\text{ArSSAr}$  ( $\text{Ar} = p\text{-MeOC}_6\text{H}_4$ ) (277.6 mg, 0.997 mmol) and 1-methyl-2-(4,4,7-trimethylocta-1,6-dienyl)benzene (**3e**) (71.7 mg, 0.296 mmol) with 0.06 F/mol of electricity (method A, reaction temperature:  $0^\circ\text{C}$ ), and purified via GPC to give **5e** (129.2 mg, 0.248 mmol, 84%). This compound was characterized as a mixture of two diastereomers (2.2:1 by  $^1\text{H}$  NMR analysis): TLC  $R_f$  0.30 (hexane/EtOAc 10:1);  $^1\text{H}$  NMR (600 MHz,  $\text{CDCl}_3$ )  $\delta$  0.52 (s, 3H) and 1.20 (s, 3H), 0.74 (s, 3H) and 0.80 (s, 3H), 0.95 (s, 3H) and 0.98 (s, 3H), 1.26 (s, 3H) and 1.36 (s, 3H), 1.40-1.96 (m, 5H), 1.97 (br s, 3H) and 2.21 (s, 3H), 2.74 (dd,  $J = 12.7, 4.1$  Hz, 1H) and 2.80 (dd,  $J = 12.7, 4.1$  Hz, 1H), 3.72 (s, 3H) and 3.76 (s, 3H), 3.77 (s, 3H) and 3.78 (s, 3H), 4.54 (br s, 1H) and 4.70 (d,  $J = 3.8$  Hz, 1H), 6.60-7.70 (m, 12H);  $^{13}\text{C}$  NMR (150 MHz,  $\text{CDCl}_3$ )  $\delta$  14.7 and 15.8, 19.6 and 20.4, 24.68 and 24.74, 28.2 and 28.3, 31.8 and 31.9, 33.0 and 33.2, 37.1 and 37.4, 39.7 and 40.3, 43.9 and 44.0, 48.2 and 49.3, 50.7 and 51.5, 55.18 and 55.18, 55.23 and 55.23, 59.5 and 59.6, 114.1 and 114.2, 114.4 and 114.4, 125.7 and 125.8, 126.1 and 126.2, 126.6 and 127.2, 127.4 and 128.7, 129.6 and 129.9, 130.4 and 132.6, 134.1 and 134.4, 134.1 and 135.5, 135.5 and 136.2, 139.8 and 143.7, 158.8 and 158.8, 159.4 and 159.6; LRMS (EI)  $m/z$  520 ( $\text{M}^+$ ), 381 ( $\text{M}^+ - \text{S}(p\text{-MeOC}_6\text{H}_4)$ ); HRMS (EI) calcd for  $\text{C}_{32}\text{H}_{40}\text{O}_2\text{S}_2$  ( $\text{M}^+$ ) 520.2470, found 520.2476.

**1-(4-Methoxyphenylthio)-2,2-dimethyl-3-(phenyl(4-methoxyphenylthio)methyl)cyclohexane (8).**

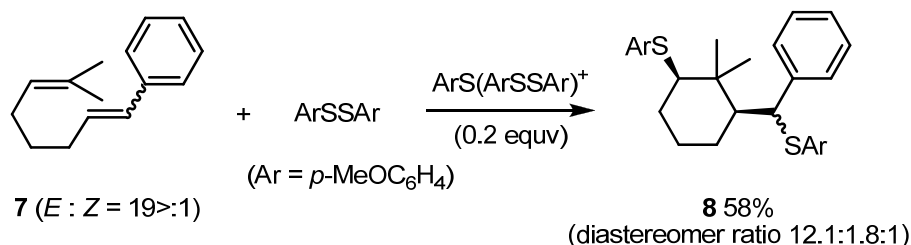

Prepared from ArSSAr (*Ar* = *p*-MeOC<sub>6</sub>H<sub>4</sub>) (282.5 mg, 1.01 mmol) and (7-methylocta-1,6-dienyl)benzene (**7**) (59.2 mg, 0.296 mmol) with 0.06 F/mol of electricity (method A, reaction temperature: 0 °C), and purified via GPC to give **8** (81.7 mg, 0.171 mmol, 58%, purity ca. 95%). This compound was characterized as a mixture of three diastereomers (12.1:1.8:1 by <sup>1</sup>H NMR analysis). The stereochemistry of the major isomer was determined by the further transformation (*vide infra*) due to the overlapping of signals: TLC *R<sub>f</sub>* 0.30 (hexane/EtOAc 10:1); <sup>1</sup>H NMR (600 MHz, CDCl<sub>3</sub>, major isomer) δ 1.03-1.13 (m, 1H), 1.29 (s, 3H), 1.40 (s, 3H), 1.63-1.97 (m, 6H), 2.60 (dd, *J* = 12.7, 4.1 Hz, 1H), 3.72 (s, 3H), 3.77 (s, 3H), 4.33 (d, *J* = 1.7 Hz, 1H), 6.63-6.82 (m, 4H), 7.00-7.37 (m, 9H); <sup>13</sup>C NMR (150MHz, CDCl<sub>3</sub>, major isomer) δ 16.5, 23.5, 27.2, 28.5, 30.9, 40.3, 55.2, 55.3, 55.8, 56.5, 63.2, 114.2, 114.4, 126.3, 127.1, 127.8, 128.2, 129.8, 134.2, 134.9, 145.7, 158.98, 159.05; LRMS (EI) *m/z* 478 (*M*<sup>+</sup>); HRMS (EI) calcd for C<sub>29</sub>H<sub>34</sub>O<sub>2</sub>S<sub>2</sub> (*M*<sup>+</sup>) 478.2000, found 478.1998.

This compound was further transformed by the cathodic reduction in order to determine the stereochemistry of the major isomer completely.

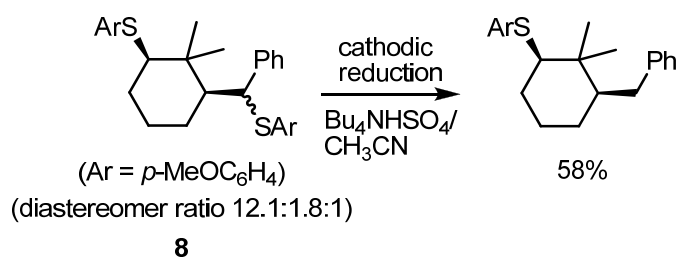

The cathodic reduction was carried out in an H-type divided cell as described above. In the cathodic chamber was placed a solution of 1-(4-methoxyphenylthio)-2,2-dimethyl-3-(phenyl(4-methoxyphenylthio)methyl)cyclohexane (**8**) (92.1 mg, 0.192 mmol, a mixture of three diastereomers) in 0.2 M Bu<sub>4</sub>NHSO<sub>4</sub>/CH<sub>3</sub>CN (4.0 mL). In the anodic chamber was placed 0.2 M Bu<sub>4</sub>NHSO<sub>4</sub>/CH<sub>3</sub>CN (4.0 mL). The constant current electrolysis (25 mA) was carried out at 0 °C with magnetic stirring (6.5 F/mol of electricity) until starting material (**8**) was consumed completely. After the electrolysis, the reaction was quenched with Et<sub>3</sub>N (1

mL). The solvent was removed under reduced pressure and the residue was quickly filtered through a short column (2 x 3 cm) of silica gel to remove Bu<sub>4</sub>NHSO<sub>4</sub>. The silica gel was washed with ether (150 mL). The crude product was purified via flash chromatography (hexane/EtOAc 20:1) and <sup>1</sup>H NMR analysis using (Cl<sub>2</sub>CH)<sub>2</sub> as an internal standard indicated that 1-(4-methoxyphenylthio)-2,2-dimethyl-3-benzylcyclohexane was formed in 58 % yield. The stereochemistry of the major isomer was determined by the proton-proton coupling constant and proton homonuclear NOE experiments: TLC *R<sub>f</sub>* 0.46 (hexane/EtOAc 10:1); <sup>1</sup>H NMR (600 MHz, CDCl<sub>3</sub>, major isomer) δ 0.97 (s, 3H), 0.97-1.03 (m, 1H), 1.06-1.17 (m, 1H), 1.34 (tt, *J* = 11.0, 2.4 Hz, 1H), 1.37-1.42 (m, 1H), 1.43 (s, 3H), 1.56-1.65 (m, 2H), 1.80-1.85 (m, 1H), 2.09 (dd, *J* = 13.0, 11.0 Hz, 1H), 2.70 (dd, *J* = 12.4, 4.1 Hz, 1H), 3.00 (dd, *J* = 13.0, 2.4 Hz, 1H), 3.79 (s, 3H), 6.81-6.85 (m, 2H), 7.10-7.30 (m, 5H), 7.37-7.40 (m, 2H); <sup>13</sup>C NMR (150 MHz, CDCl<sub>3</sub>, major isomer) δ 15.1, 26.6, 26.6, 27.9, 31.1, 37.4, 38.8, 50.8, 55.3, 62.9, 114.4, 125.6, 127.2, 128.1, 129.1, 134.9, 142.2, 159.0; LRMS (EI) *m/z* 340 (M<sup>+</sup>); HRMS (EI) calcd for C<sub>22</sub>H<sub>28</sub>O<sub>1</sub>S<sub>1</sub> (M<sup>+</sup>) 340.1861, found 340.1862.

NOE Data for 1-(4-methoxyphenylthio)-2,2-dimethyl-3-benzylcyclohexane:

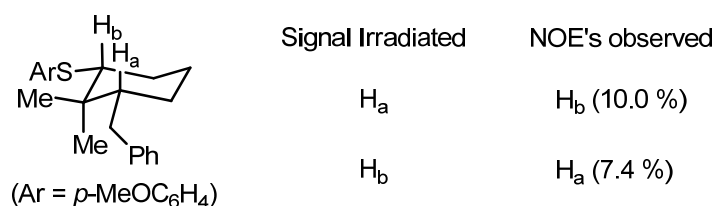

### 1-(4-Methoxyphenylthio)-2,2,5,5-tetramethyl-3-(dimethyl(4-methoxyphenylthio)methyl)cyclohexane (**10**).

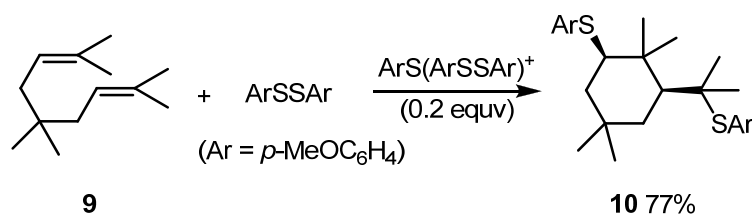

Prepared from ArSSAr (Ar = *p*-MeOC<sub>6</sub>H<sub>4</sub>) (283.2 mg, 1.02 mmol) and 2,5,5,8-tetramethylnona-2,7-diene (**9**) (54.4 mg, 0.302 mmol) with 0.06 F/mol of electricity (method A, reaction temperature: -78 °C), and purified via GPC to give **10** (106.6 mg, 0.232 mmol, 77%). This compound was obtained as a single diastereomer. The stereochemistry was determined by the proton-proton coupling constant and proton homonuclear NOE experiments: TLC *R<sub>f</sub>* 0.21 (hexane/EtOAc 20:1); <sup>1</sup>H NMR (600 MHz, CDCl<sub>3</sub>) δ 0.88 (s, 3H), 0.97 (s, 3H), 1.03 (s, 3H), 1.24 (s, 3H), 1.42 (s, 3H), 1.45 (s, 3H), 1.46 (t, *J* = 13.0 Hz, 1H), 1.56-1.68 (m, 3H), 2.02 (d, *J* = 13.0 Hz, 1H), 2.81 (dd, *J* = 13.1, 4.4 Hz, 1H), 3.80 (s, 3H), 3.82 (s, 3H), 6.82 (d, *J* = 8.2 Hz, 2H), 6.85 (d, *J* = 8.2 Hz, 2H), 7.32 (d, *J* = 8.2 Hz, 2H), 7.40 (d, *J* = 8.2 Hz, 2H); <sup>13</sup>C NMR (150 MHz, CDCl<sub>3</sub>) δ 16.5,



24.3, 27.0, 30.3, 31.5, 32.4, 33.1, 38.9, 41.4, 44.8, 50.5, 55.26, 55.29, 56.0, 61.5, 113.9, 114.5, 123.7, 127.6, 134.1, 139.2, 158.8, 160.3; LRMS (EI)  $m/z$  458 ( $M^+$ ); HRMS (EI) calcd for  $C_{27}H_{38}O_2S_2$  ( $M^+$ ) 458.2313, found 458.2311.

NOE Data for **10**:

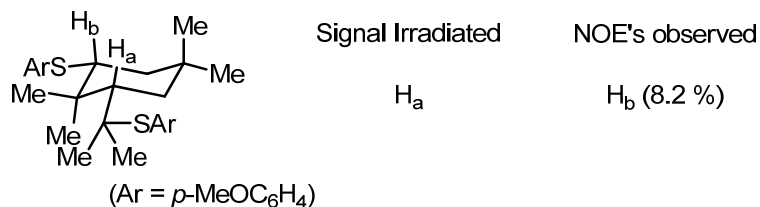

**1-(4-Methoxyphenylthio)-2-phenyl-3-(phenyl(4-methoxyphenylthio)methyl)cyclohexane (12).**

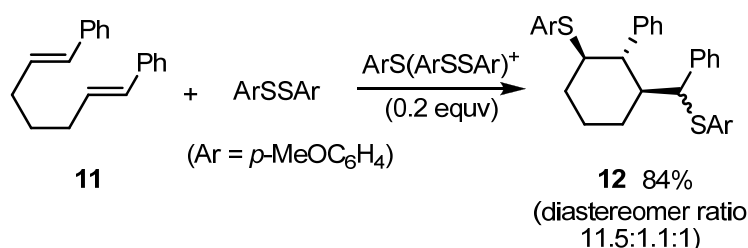

Prepared from ArSSAr (Ar = *p*-MeOC<sub>6</sub>H<sub>4</sub>) (281.5 mg, 1.01 mmol) and (*E*)-1-phenyl-(*E*)-7-phenyl-1,6-heptadiene (**11**) (74.8 mg, 0.301 mmol) with 0.06 F/mol of electricity (method A, reaction temperature: 33 °C), and purified via GPC. <sup>1</sup>H NMR analysis using (Cl<sub>2</sub>CH)<sub>2</sub> as an internal standard indicated that the title compound (**12**) was formed in 84 % yield. This compound was characterized as a mixture of three diastereomers (11.5:1.1:1 by <sup>1</sup>H NMR analysis). Analytical sample was further purified by HPLC (hexane/EtOAc 20:1) to obtain three compounds (diastereomer **12-1**, **12-2** and **12-3**).

Diastereomer **12-1** (main diastereomer)

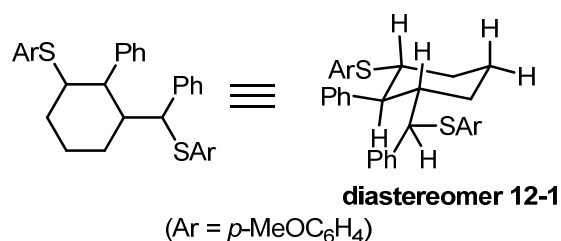

The stereochemistry was determined based on the proton-proton coupling constants because proton homonuclear NOE experiments could not provide clear results due to the overlapping of signals: TLC  $R_f$  0.23 (hexane/EtOAc 10:1); <sup>1</sup>H NMR (600 MHz, CDCl<sub>3</sub>)  $\delta$  1.14 (qt,  $J = 13.4, 3.4$  Hz, 1H), 1.38 (qd,  $J = 13.4, 3.4$  Hz, 1H), 1.44-1.52 (m, 1H), 1.72-1.80 (m, 2H), 1.98 (tt,  $J = 11.3, 2.4$  Hz, 1H), 2.01-2.08 (m, 1H), 3.07 (td,  $J =$

11.3, 3.4 Hz, 1H), 3.12 (t,  $J = 11.3$  Hz, 1H), 3.65 (s, 3H), 3.76 (s, 3H), 3.80 (d,  $J = 2.4$  Hz, 1H), 6.55-6.58 (m, 2H), 6.72-6.76 (m, 2H), 6.92-6.96 (m, 2H), 7.09-7.13 (m, 1H), 7.15-7.21 (m, 6H), 7.27-7.30 (m, 1H), 7.33-7.42 (m, 4H);  $^{13}\text{C}$  NMR (150 MHz,  $\text{CDCl}_3$ )  $\delta$  25.4, 26.0, 34.6, 52.4, 53.3, 54.6, 55.1, 55.2, 57.9, 114.08, 114.13, 125.0, 126.0, 126.5, 127.0, 127.9, 128.5, 133.2, 133.2, 136.0, 136.0, 142.2, 142.6, 158.6, 159.2; LRMS (EI)  $m/z$  526 ( $\text{M}^+$ ), 387 ( $\text{M}^+ - \text{S}(p\text{-MeOC}_6\text{H}_4)$ ); HRMS (EI) calcd for  $\text{C}_{33}\text{H}_{34}\text{O}_2\text{S}_2$  ( $\text{M}^+$ ) 526.2000, found 526.2000.

#### Diastereomer **12-2** (second diastereomer)

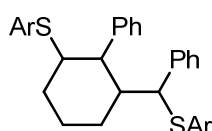

**diastereomer 12-2**  
(Ar =  $p\text{-MeOC}_6\text{H}_4$ )

The stereochemistry was not determined: TLC  $R_f$  0.23 (hexane/EtOAc 10:1);  $^1\text{H}$  NMR (600 MHz,  $\text{CDCl}_3$ )  $\delta$  1.75 (br d,  $J = 14.1$  Hz, 1H), 1.86-2.10 (m, 4H), 2.57-2.64 (m, 1H), 2.69 (br d,  $J = 3.5$  Hz, 1H), 2.96-3.04 (m, 1H), 3.29 (br s, 1H), 3.60 (d,  $J = 11.3$  Hz, 1H), 3.70 (s, 3H), 3.79 (s, 3H), 6.56-6.61 (m, 4H), 6.73-6.80 (m, 4H), 6.90-6.95 (m, 2H), 6.96-7.00 (m, 2H), 7.01-7.05 (m, 1H), 7.08-7.14 (m, 3H), 7.25-7.30 (m, 2H);  $^{13}\text{C}$  NMR (150 MHz,  $\text{CDCl}_3$ )  $\delta$  21.0, 25.1, 26.9, 38.9, 46.2, 53.5, 55.2, 55.3, 59.5, 113.9, 114.4, 124.8, 125.7, 126.2, 126.3, 127.5, 127.9, 128.6, 130.0, 135.5, 136.1, 141.0, 142.3, 159.3, 159.3; LRMS (EI)  $m/z$  526 ( $\text{M}^+$ ), 387 ( $\text{M}^+ - \text{S}(p\text{-MeOC}_6\text{H}_4)$ ); HRMS (EI) calcd for  $\text{C}_{33}\text{H}_{34}\text{O}_2\text{S}_2$  ( $\text{M}^+$ ) 526.2000, found 526.2003.

#### Diastereomer **12-3** (third diastereomer)

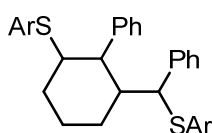

**diastereomer 12-3**  
(Ar =  $p\text{-MeOC}_6\text{H}_4$ )

The stereochemistry was not determined: TLC  $R_f$  0.23 (hexane/EtOAc 10:1);  $^1\text{H}$  NMR (600 MHz,  $\text{CDCl}_3$ )  $\delta$  1.00-1.35 (m, 3H), 1.80-1.87 (m, 1H), 1.88-1.94 (m, 1H), 2.10-2.18 (m, 2H), 2.42-2.48 (m, 1H), 2.73-2.80 (m, 1H), 3.73 (s, 3H), 3.81 (s, 3H), 3.96 (d,  $J = 2.0$  Hz, 1H), 6.63-6.67 (m, 2H), 6.73-6.78 (m, 2H), 6.93-7.02 (m, 4H), 7.10-7.17 (m, 4H), 7.22-7.32 (m, 6H);  $^{13}\text{C}$  NMR (150 MHz,  $\text{CDCl}_3$ )  $\delta$  26.0, 26.1, 34.8, 46.8, 52.8, 55.2, 55.3, 55.5, 56.6, 114.0, 114.3, 125.4, 126.8, 127.2, 127.7, 127.7, 128.3, 129.6, 129.6, 135.5, 135.6, 138.0, 142.1, 159.1, 159.4; LRMS (EI)  $m/z$  526 ( $\text{M}^+$ ), 387 ( $\text{M}^+ - \text{S}(p\text{-MeOC}_6\text{H}_4)$ ); HRMS (EI) calcd for  $\text{C}_{33}\text{H}_{34}\text{O}_2\text{S}_2$  ( $\text{M}^+$ ) 526.2000, found 526.2000.

**(4-Methoxyphenylthio)-2,2,5,5-tetramethyl-3-(prop-1-en-2-yl)cyclohexane (13).**

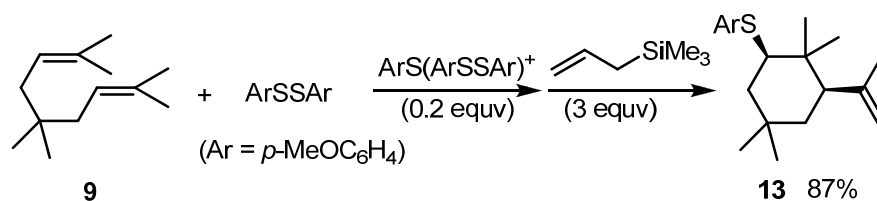

Prepared from ArSSAr (Ar = *p*-MeOC<sub>6</sub>H<sub>4</sub>) (278.9 mg, 1.00 mmol) and 2,5,5,8-tetramethylnona-2,7-diene (**9**) (55.8 mg, 0.309 mmol) with 0.06 F/mol of electricity (method A, reaction temperature: -78 °C) and allyltrimethylsilane (114.3 mg, 1.00 mmol, reaction temperature was gradually increased from -78 °C to room temperature for 0.5 h.). Then, the reaction was quenched by the addition of Et<sub>3</sub>N (1 mL). This compound was purified via GPC to give **13** (86.1 mg, 0.270 mmol, 87%). This compound was obtained as a single diastereomer. The stereochemistry was determined by the proton-proton coupling constant and proton homonuclear NOE experiments: TLC *R<sub>f</sub>* 0.45 (hexane/EtOAc 10:1); <sup>1</sup>H NMR (600 MHz, CDCl<sub>3</sub>) δ 0.97 (s, 3H), 0.916 (s, 3H), 0.919 (s, 3H), 1.11 (dt, *J* = 13.6, 2.6 Hz, 1H), 1.18 (s, 3H), 1.53-1.61 (m, 3H), 1.74 (t, *J* = 0.7 Hz, 3H), 2.06 (dd, *J* = 13.6, 2.6 Hz, 1H), 2.90 (dd, *J* = 11.7, 5.5 Hz, 1H), 3.80 (s, 3H), 4.65-4.67 (m, 1H), 4.86-4.88 (m, 1H), 6.80-6.85 (m, 2H), 7.33-7.38 (m, 2H); <sup>13</sup>C NMR (150 MHz, CDCl<sub>3</sub>) δ 15.3, 24.2, 25.1, 28.6, 31.7, 33.0, 39.0, 40.9, 44.0, 50.8, 55.3, 59.3, 113.3, 114.4, 127.6, 134.1, 147.1, 158.8; LRMS (EI) *m/z* 318 (M<sup>+</sup>); HRMS (EI) calcd for C<sub>20</sub>H<sub>30</sub>O<sub>1</sub>S<sub>1</sub> (M<sup>+</sup>) 318.2017, found 318.2015.

NOE Data for **13**:

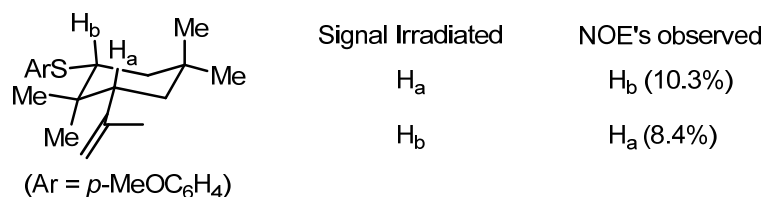

## References

1. R. Leino, J. E. Lönnqvist, *Tetrahedron Lett.*, 2004, **45**, 8489.
2. D. P. Becker, C. I. Villamil, T. E. Barta, L. J. Bedell, T. L. Boehm, G. A. DeCrescenzo, J. N. Freskos, D. P. Getman, S. Hockerman, R. Heintz, S. C. Howard, M. H. Li, J. J. McDonald, C. P. Carron, C. L. Funckes-Shippy, P. P. Mehta, G. E. Munie, C. A. Swearingen, *J. Med. Chem.*, 2005, **48**, 6713.
3. N. H. Andersen, D. W. Ladner, *Synthetic Commun.*, 1978, **8**, 449.
4. K. Yoshikai, T. Hayama, K. Nishimura, K. Yamada, K. Tomioka, *J. Org. Chem.*, 2005, **70**, 681.
5. N. S. Litter, E. Steckhan, *Tetrahedron*, 1987, **43**, 2475.

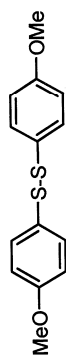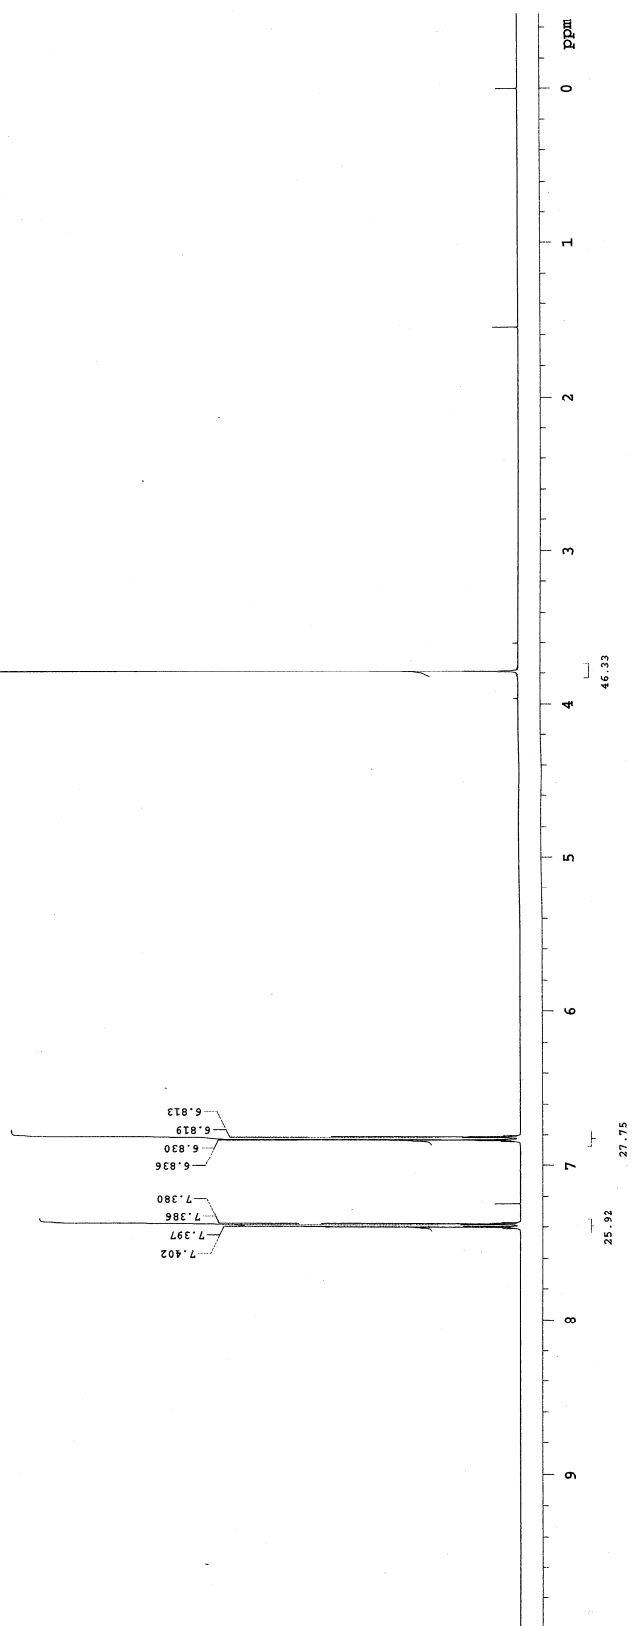

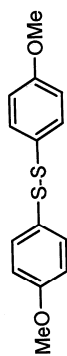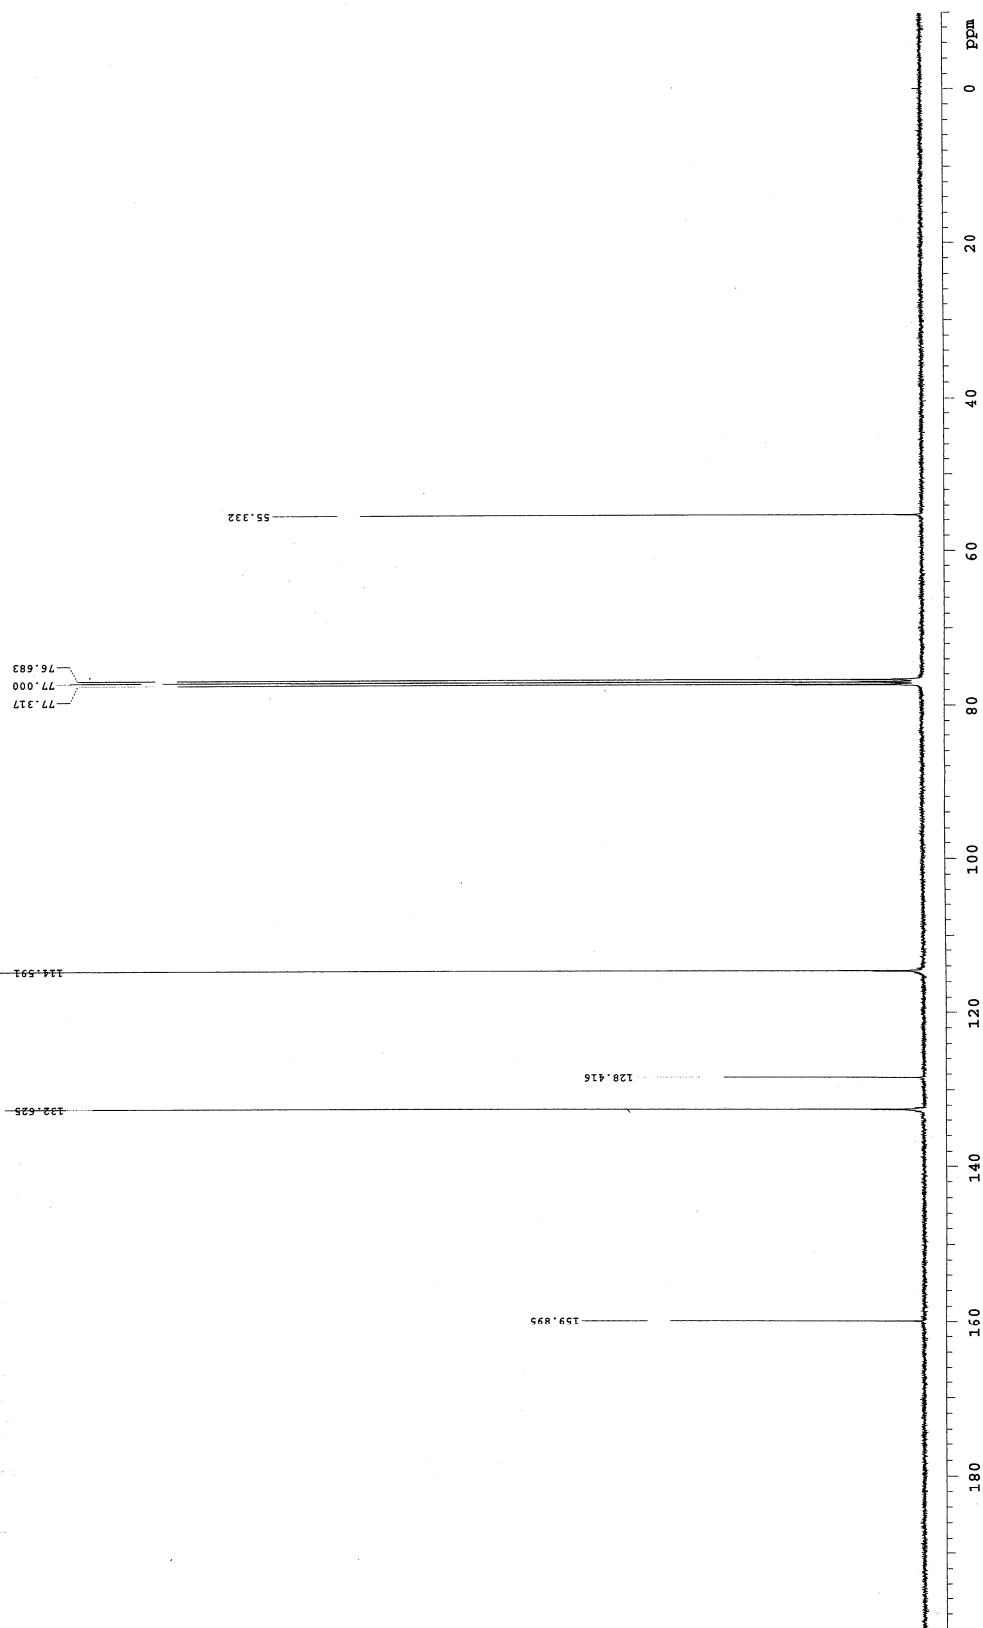

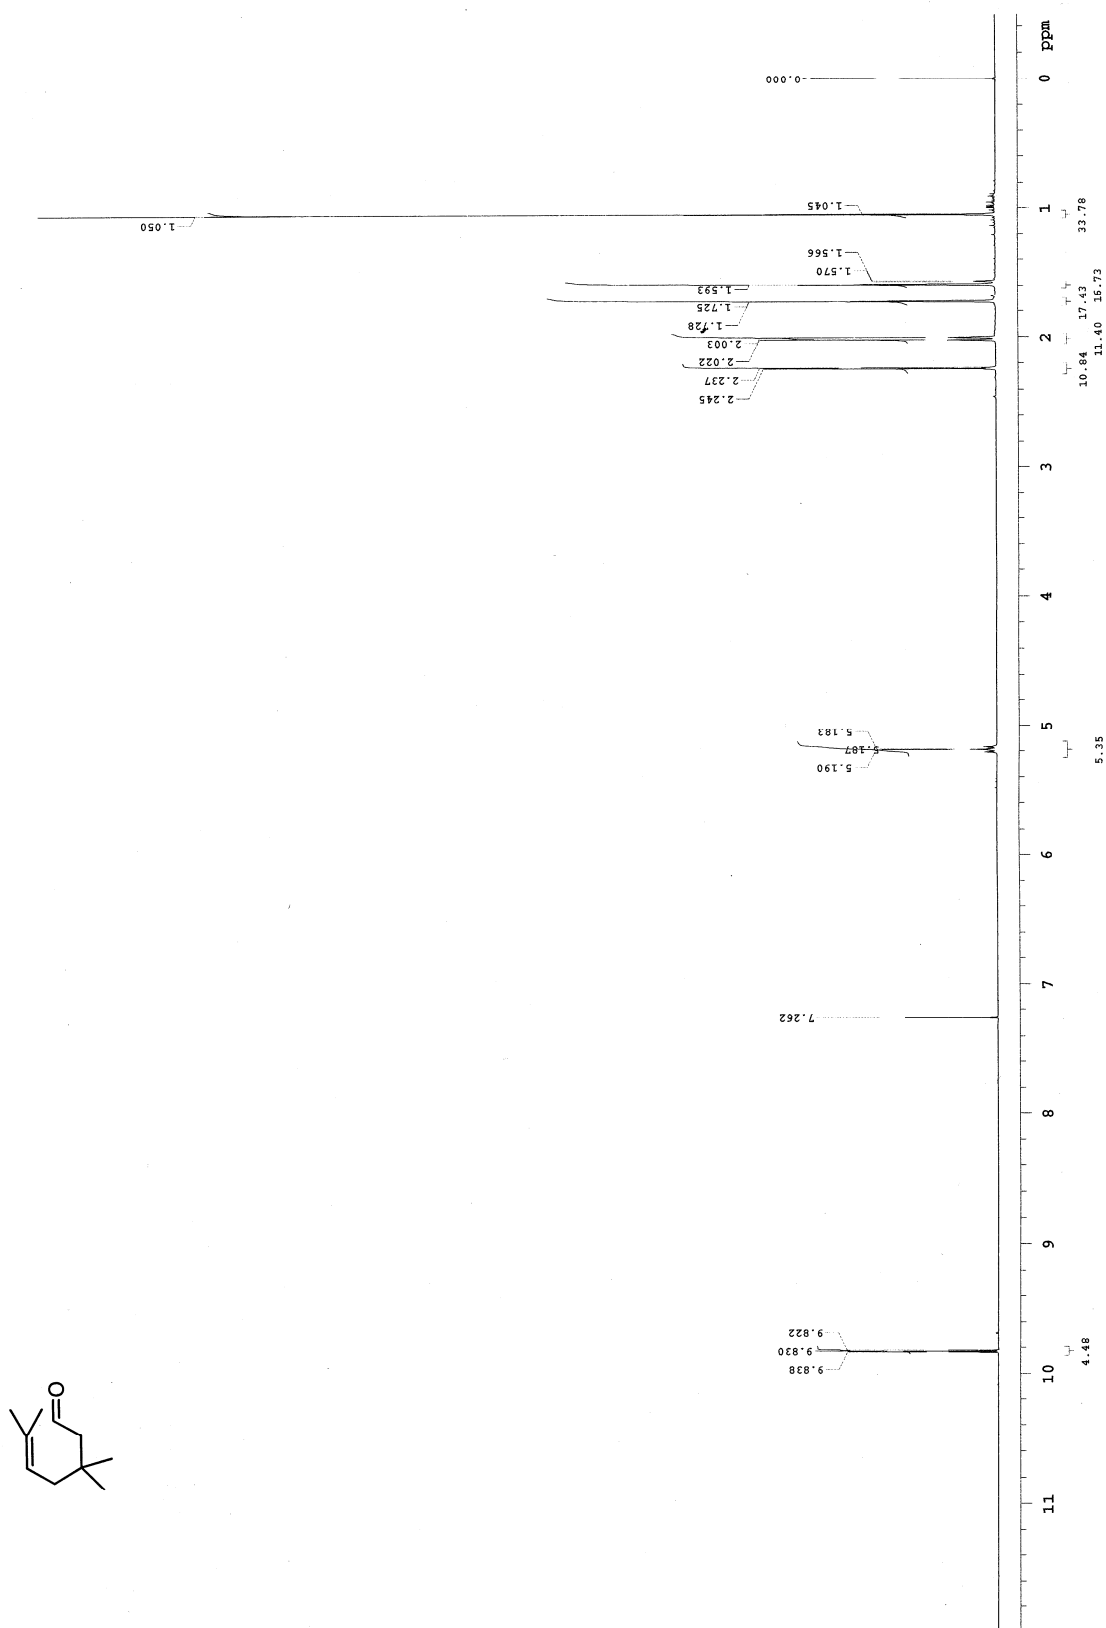

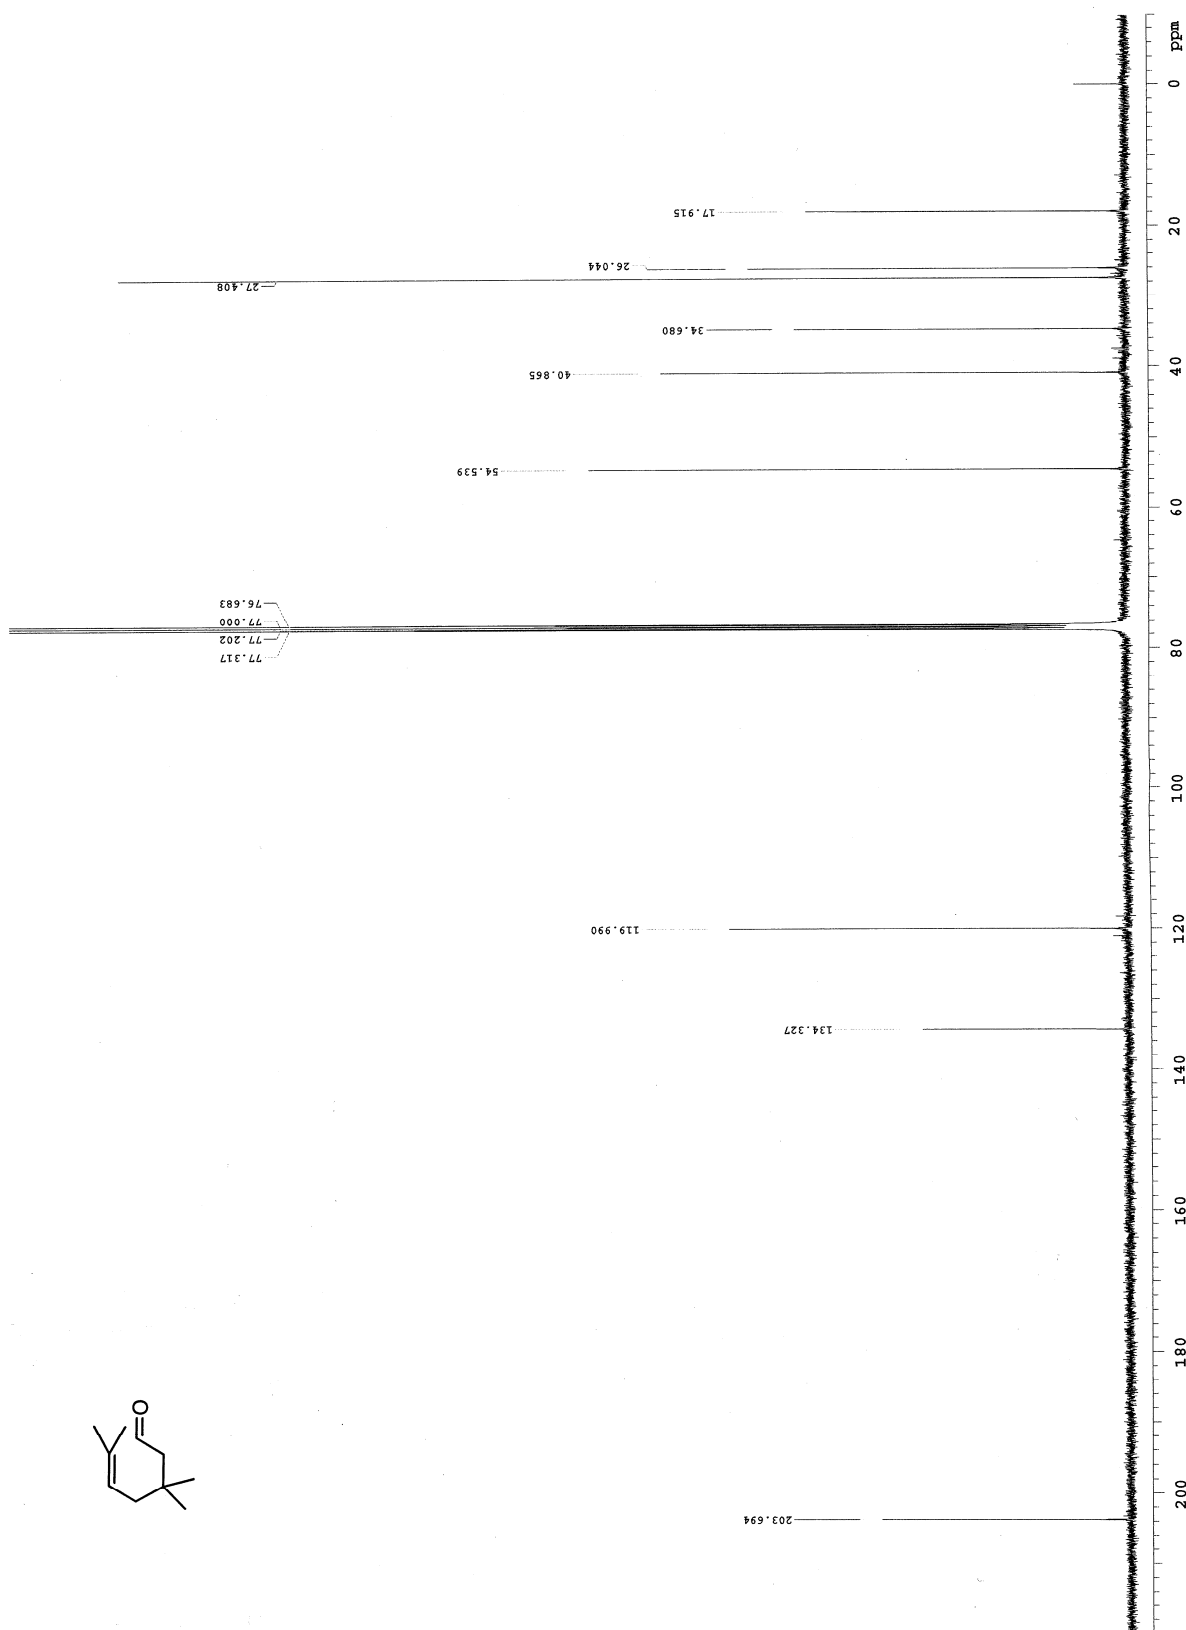

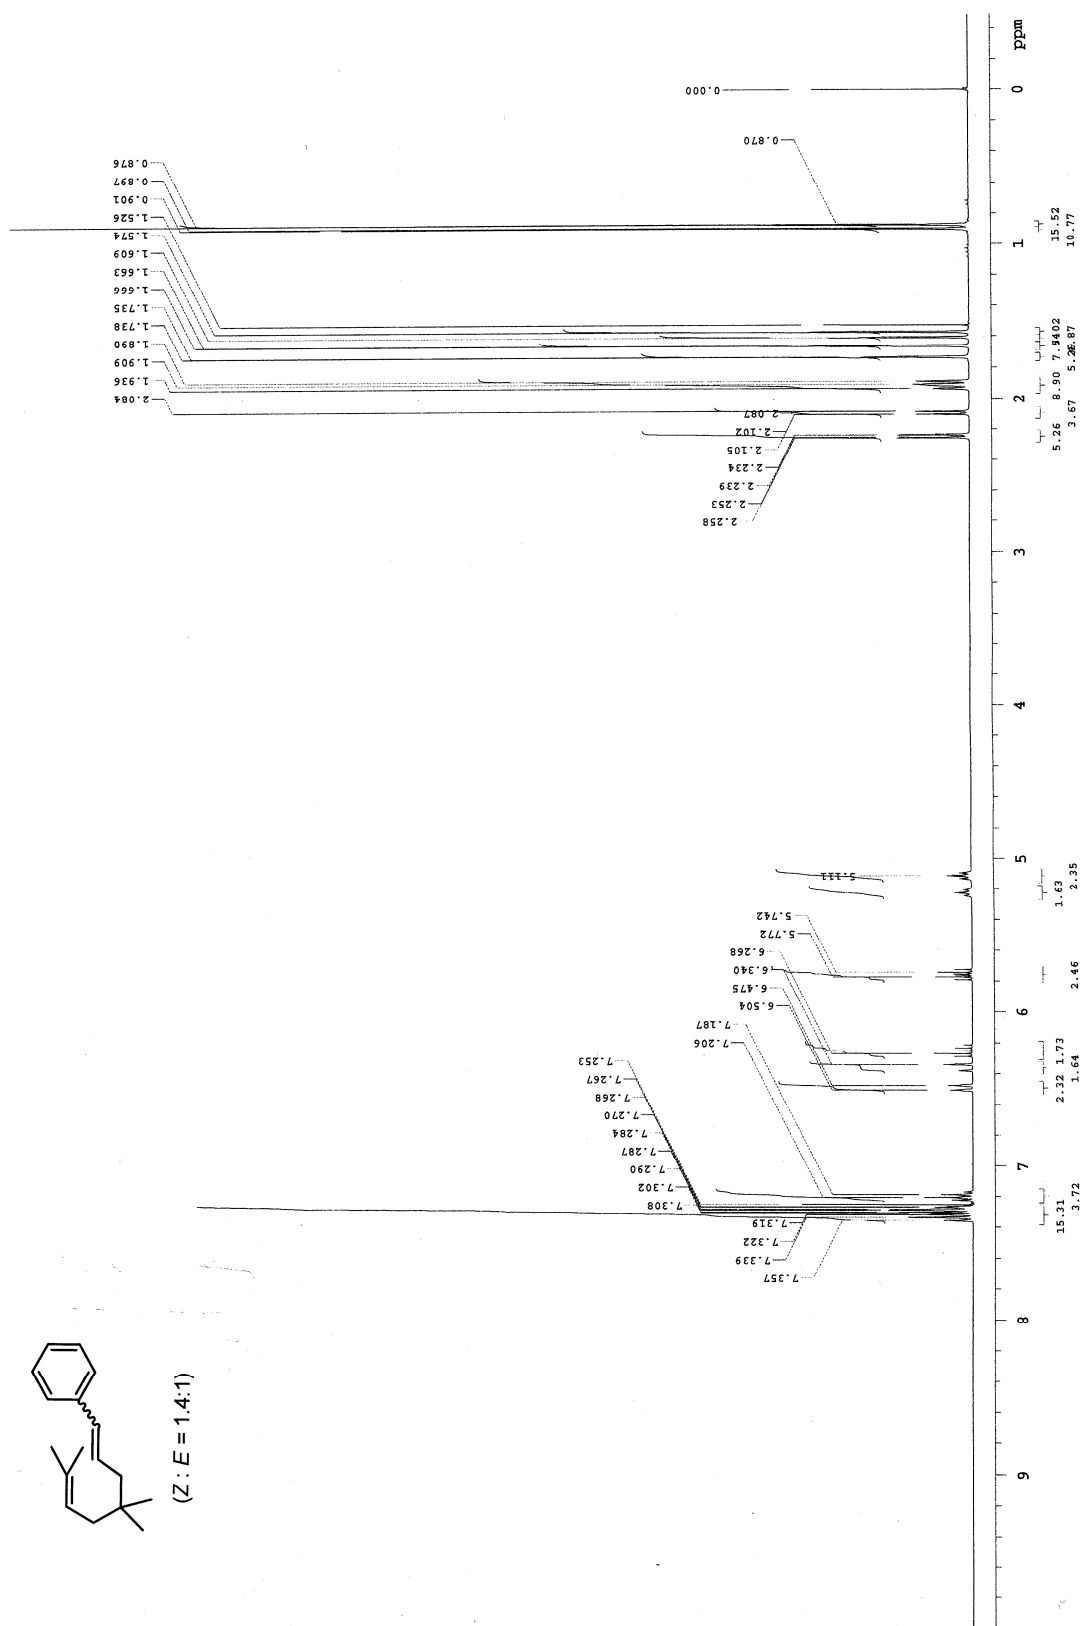





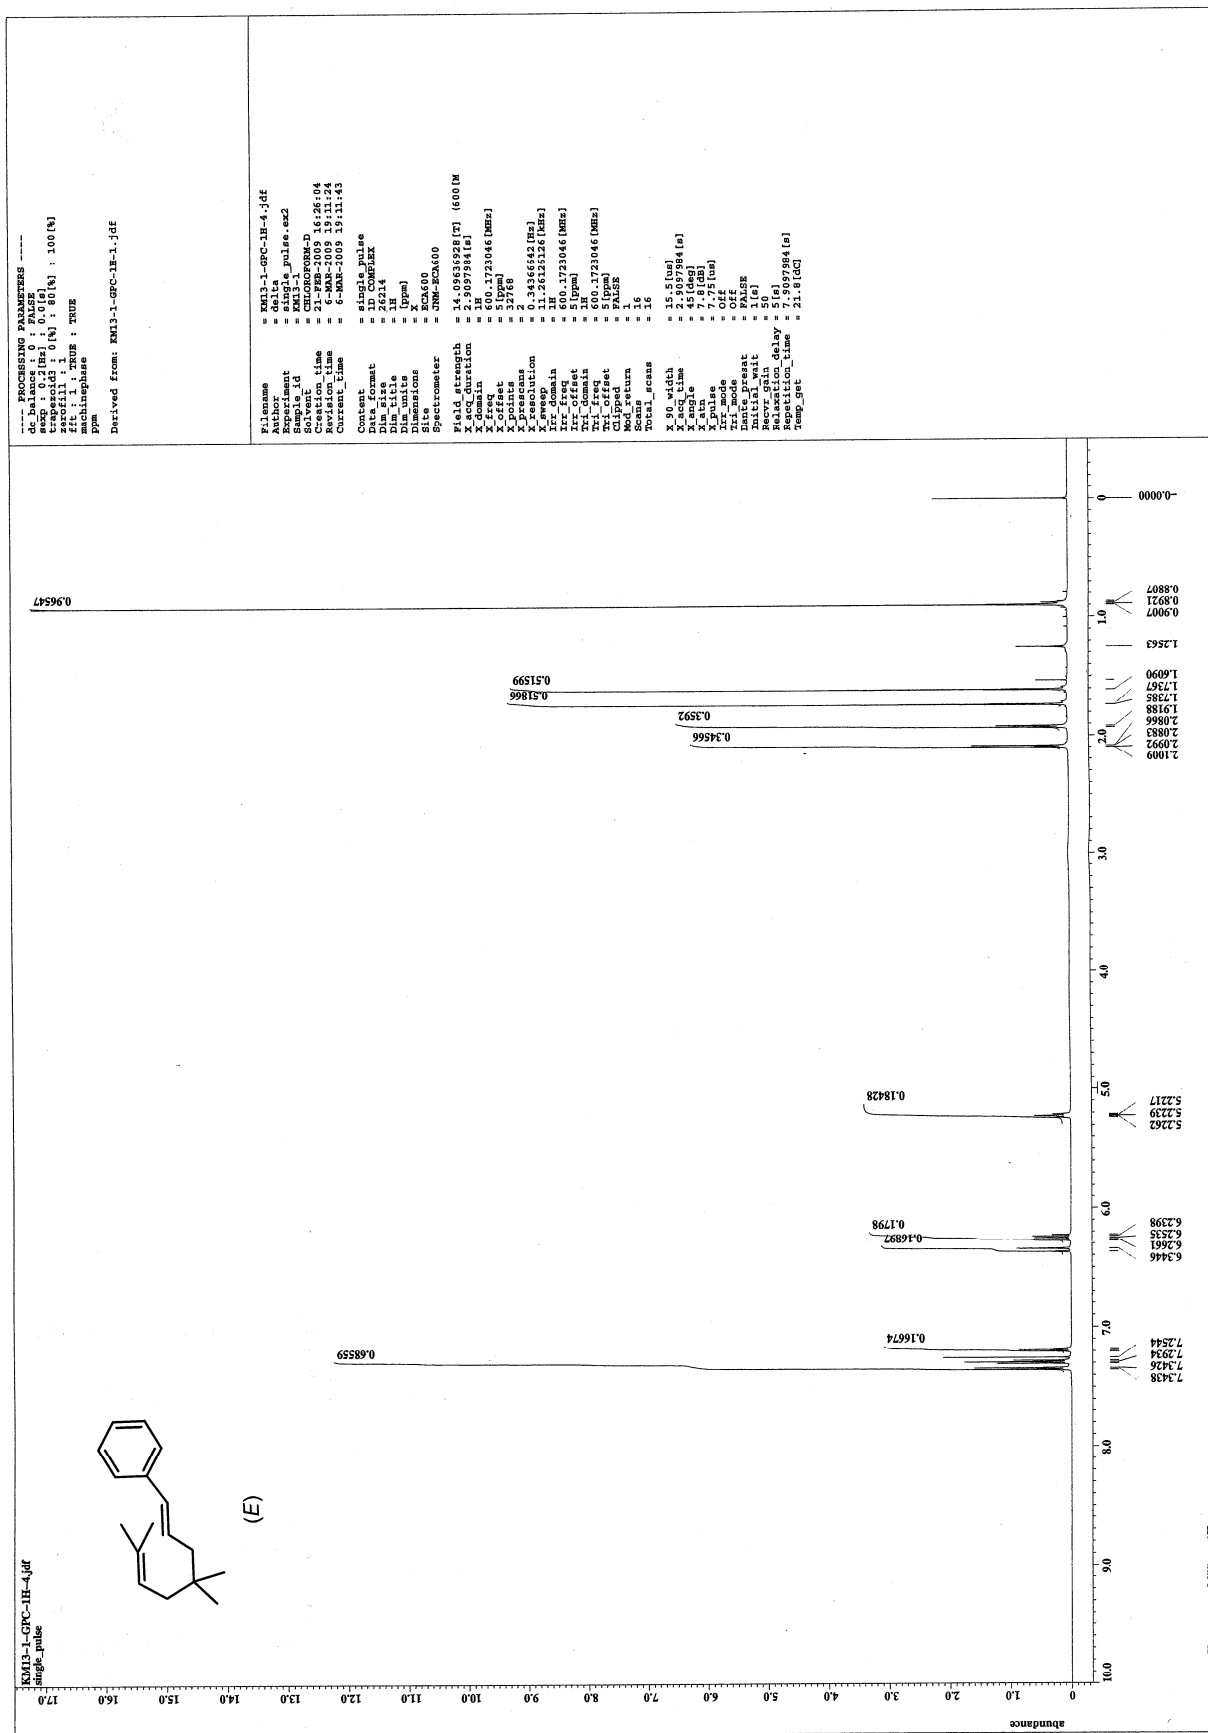



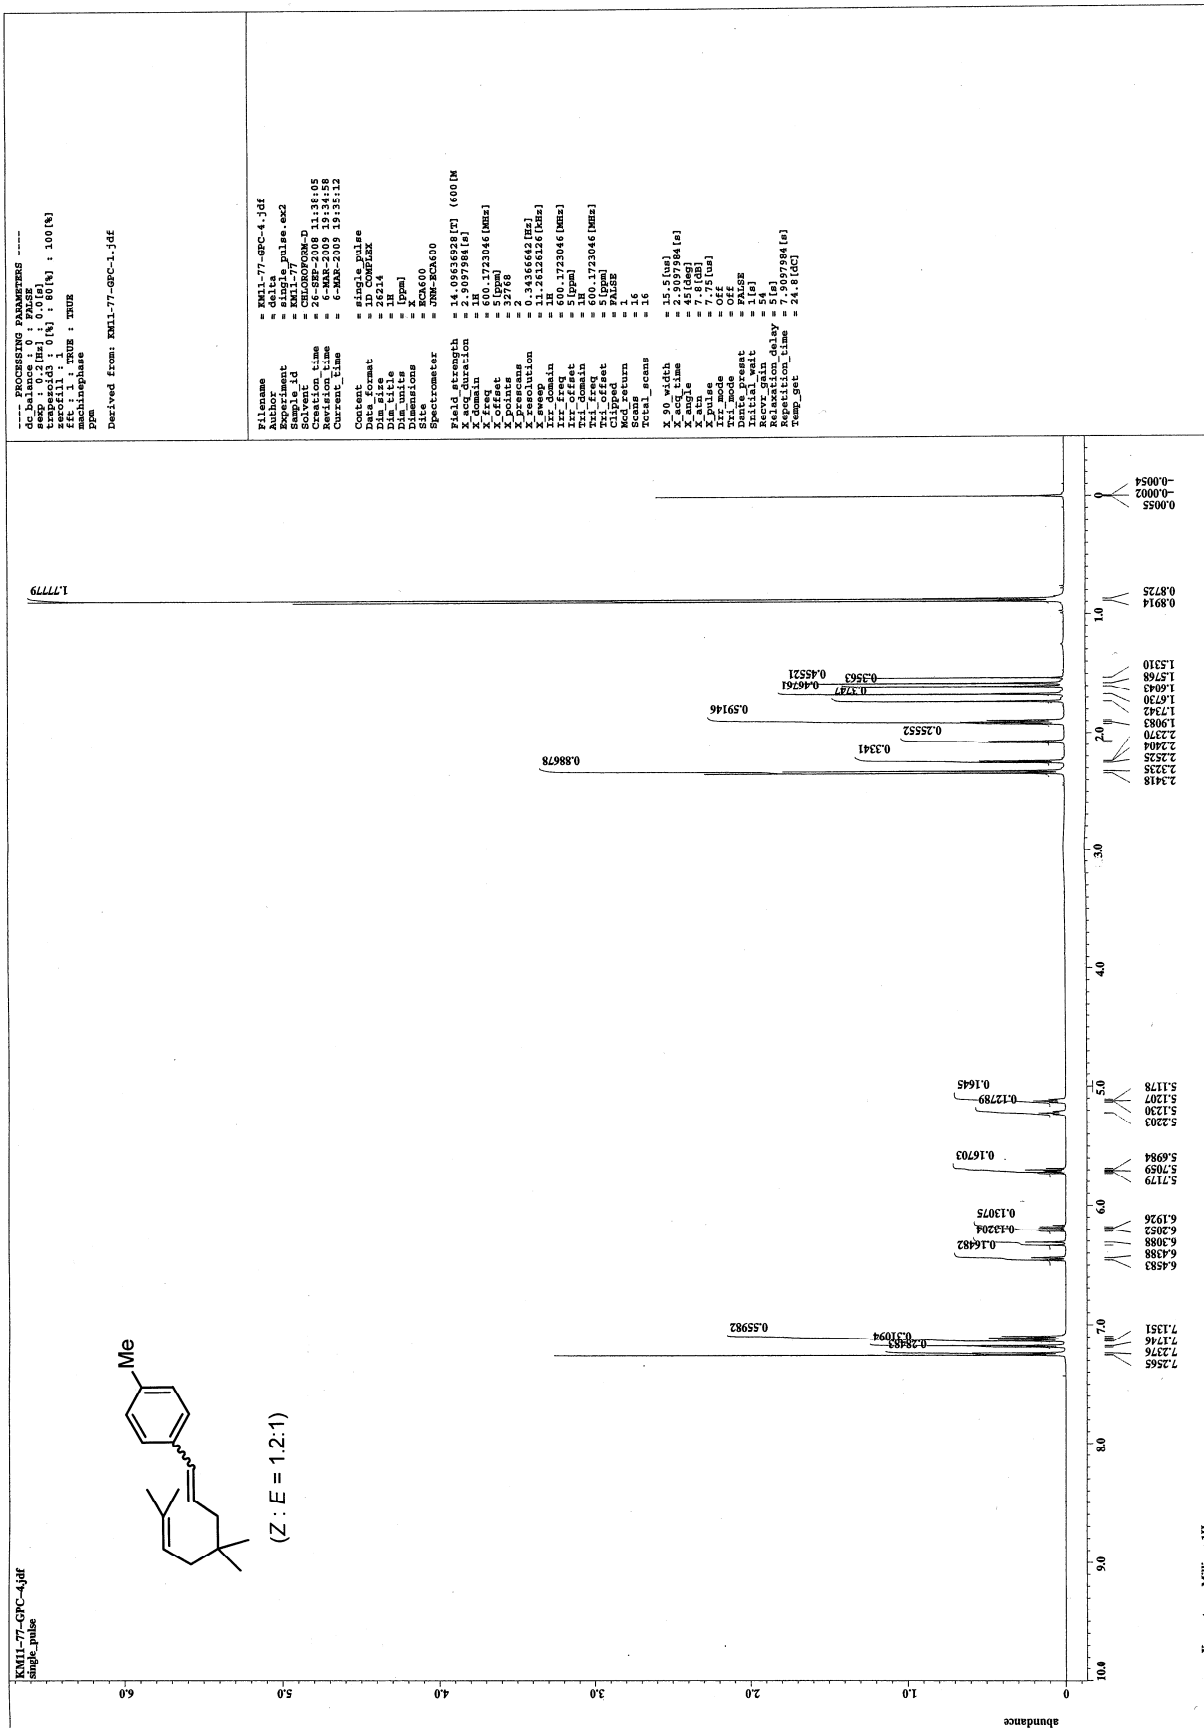

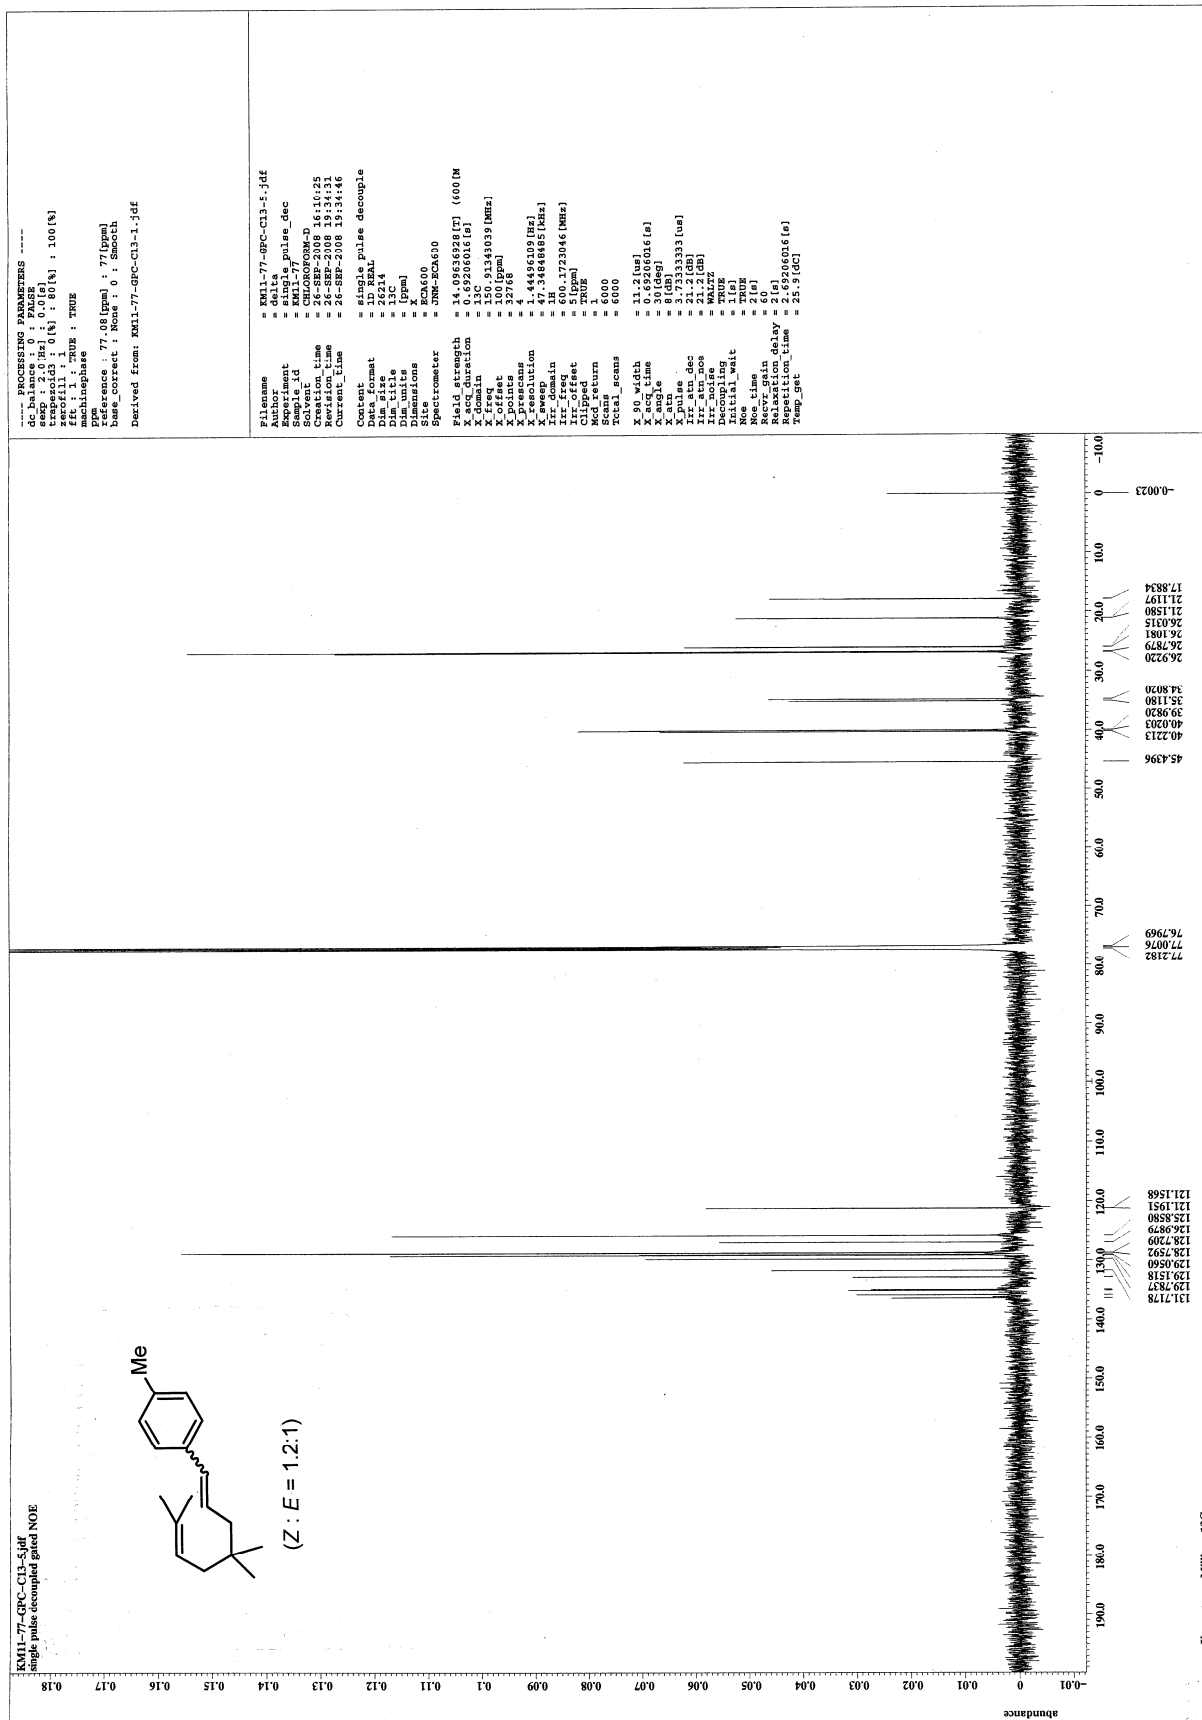



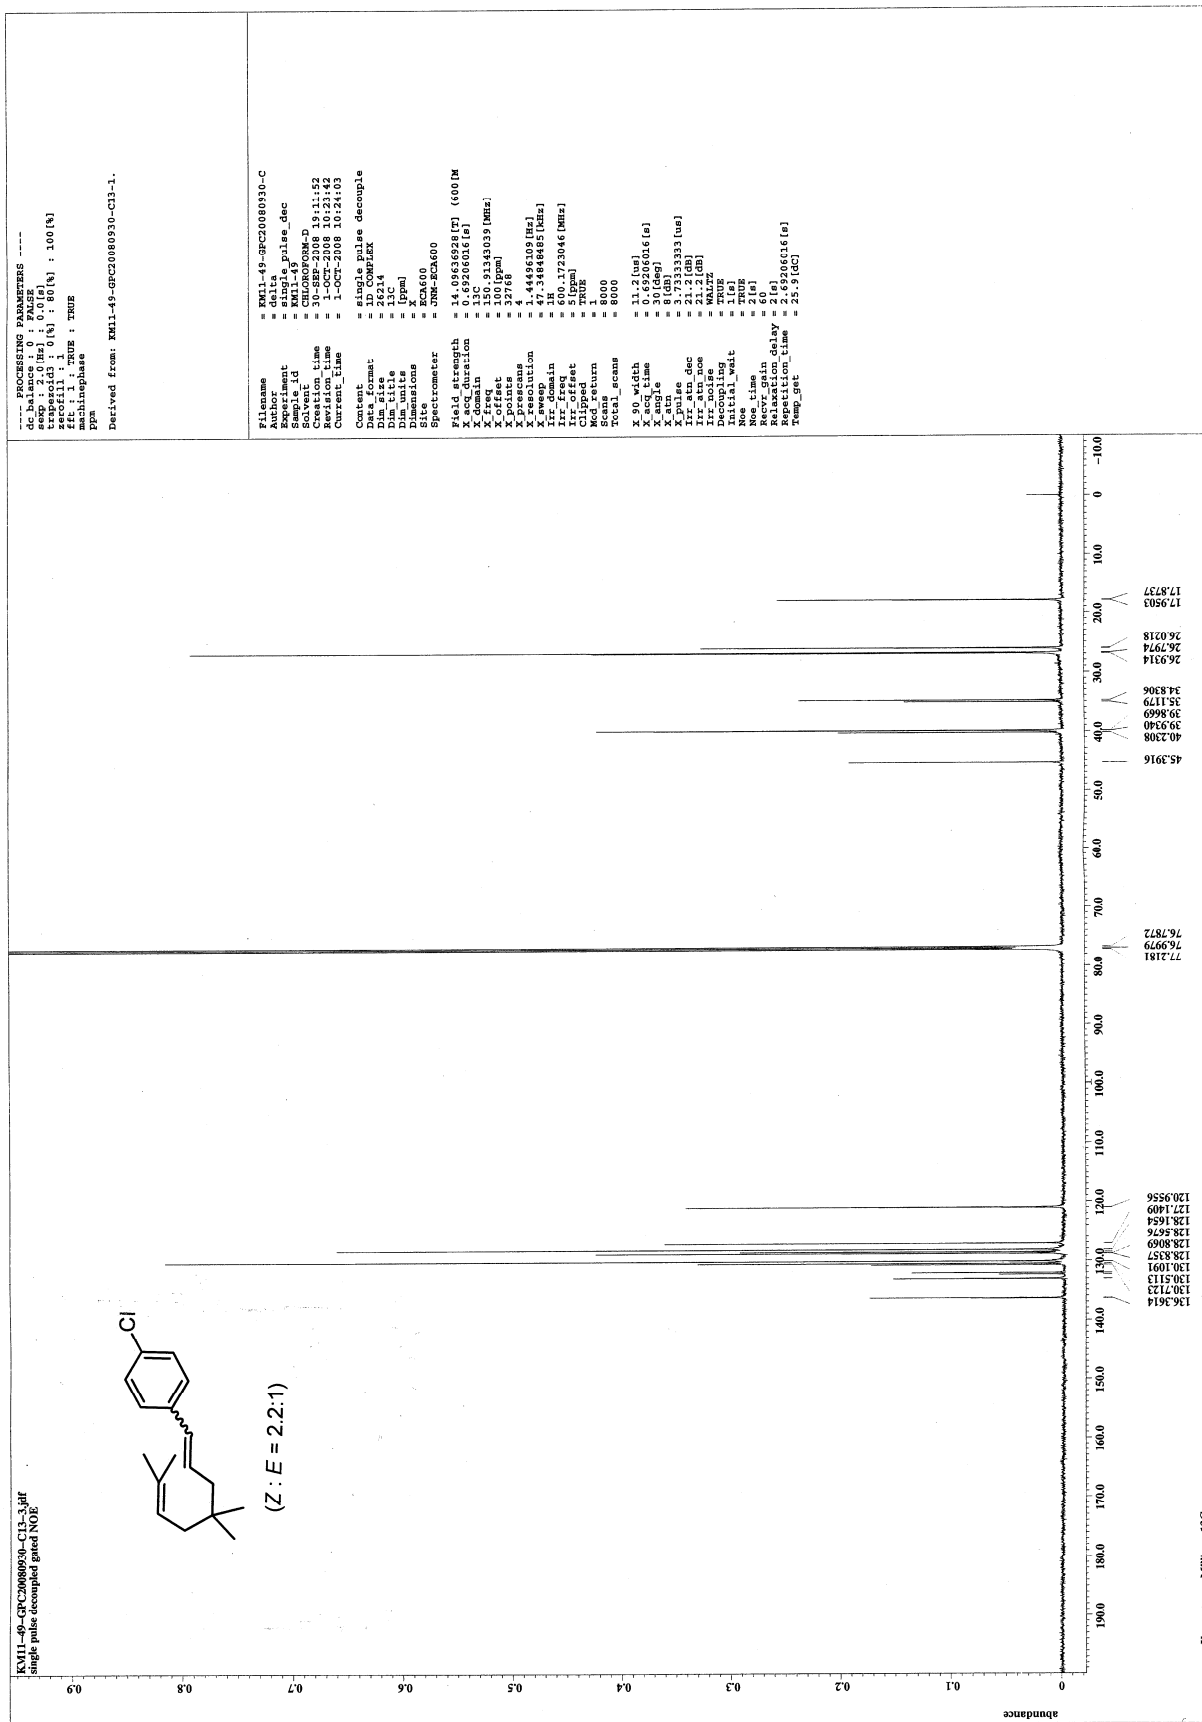





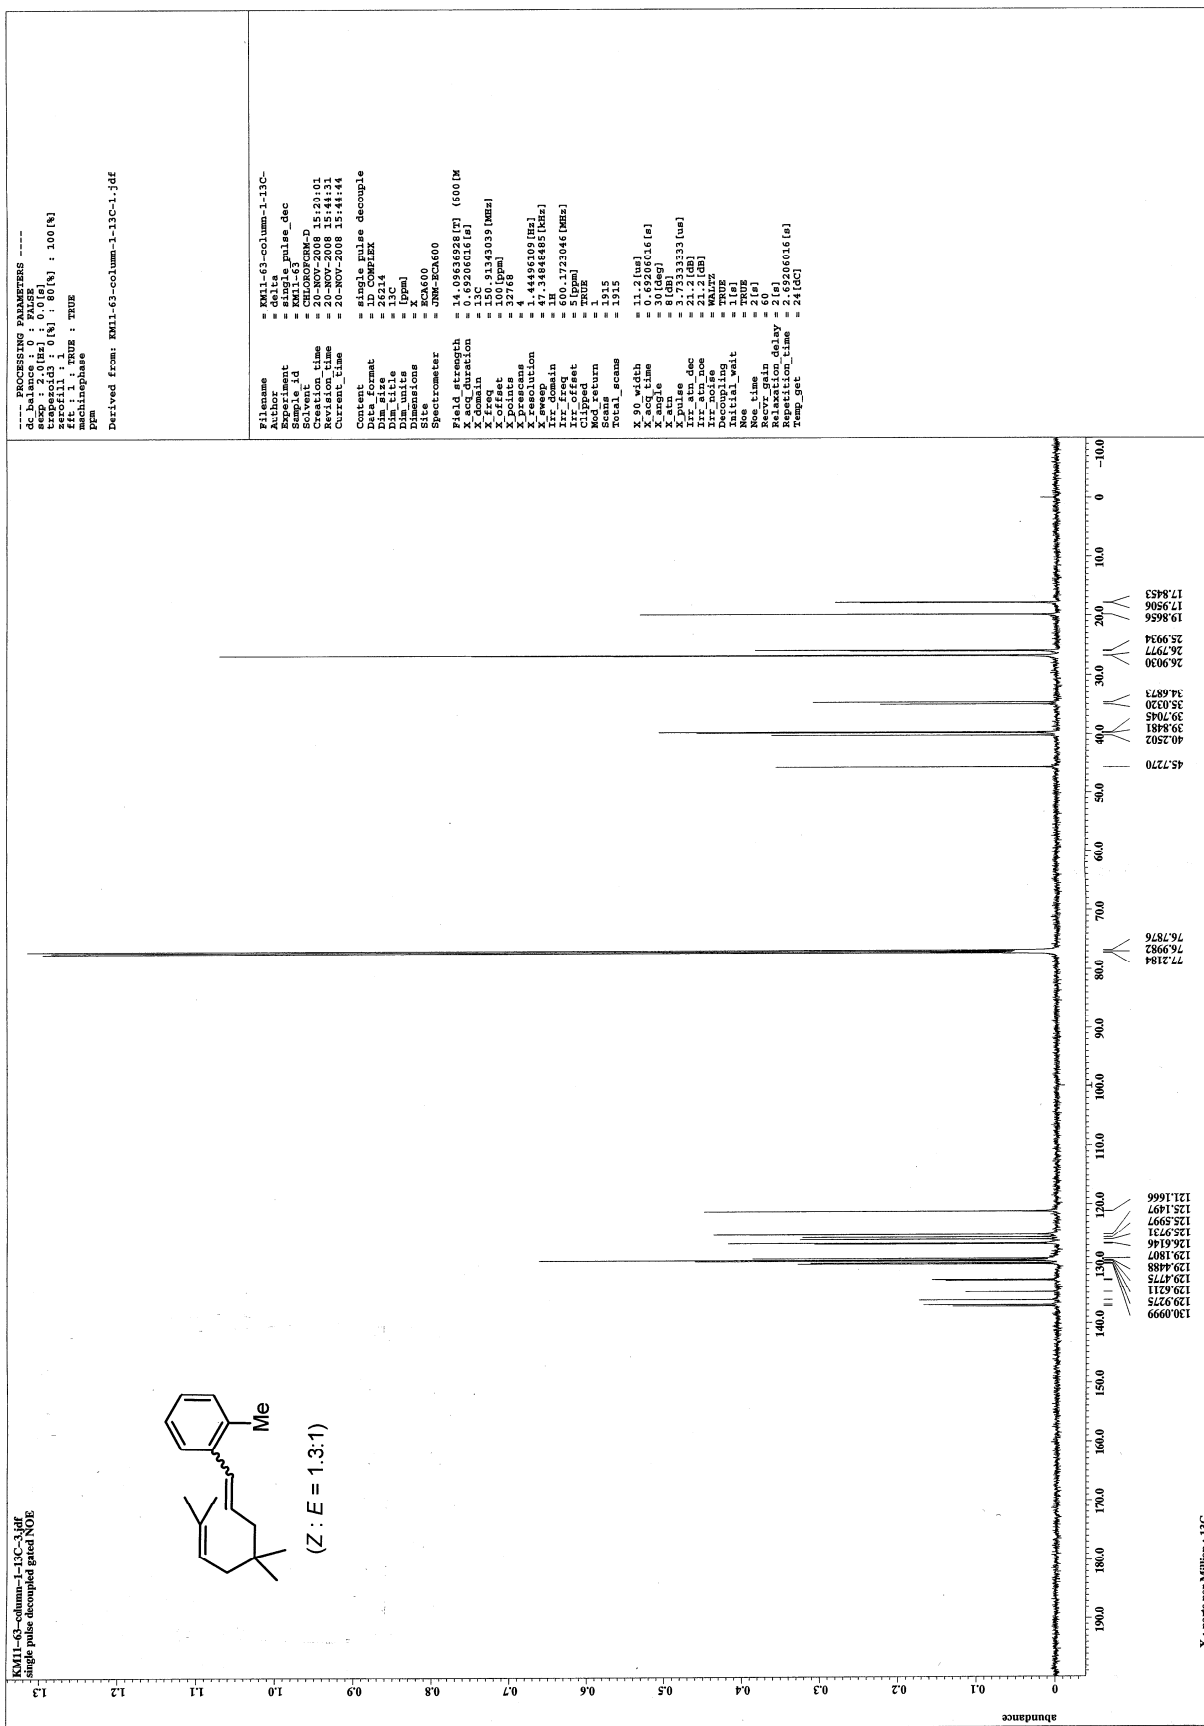



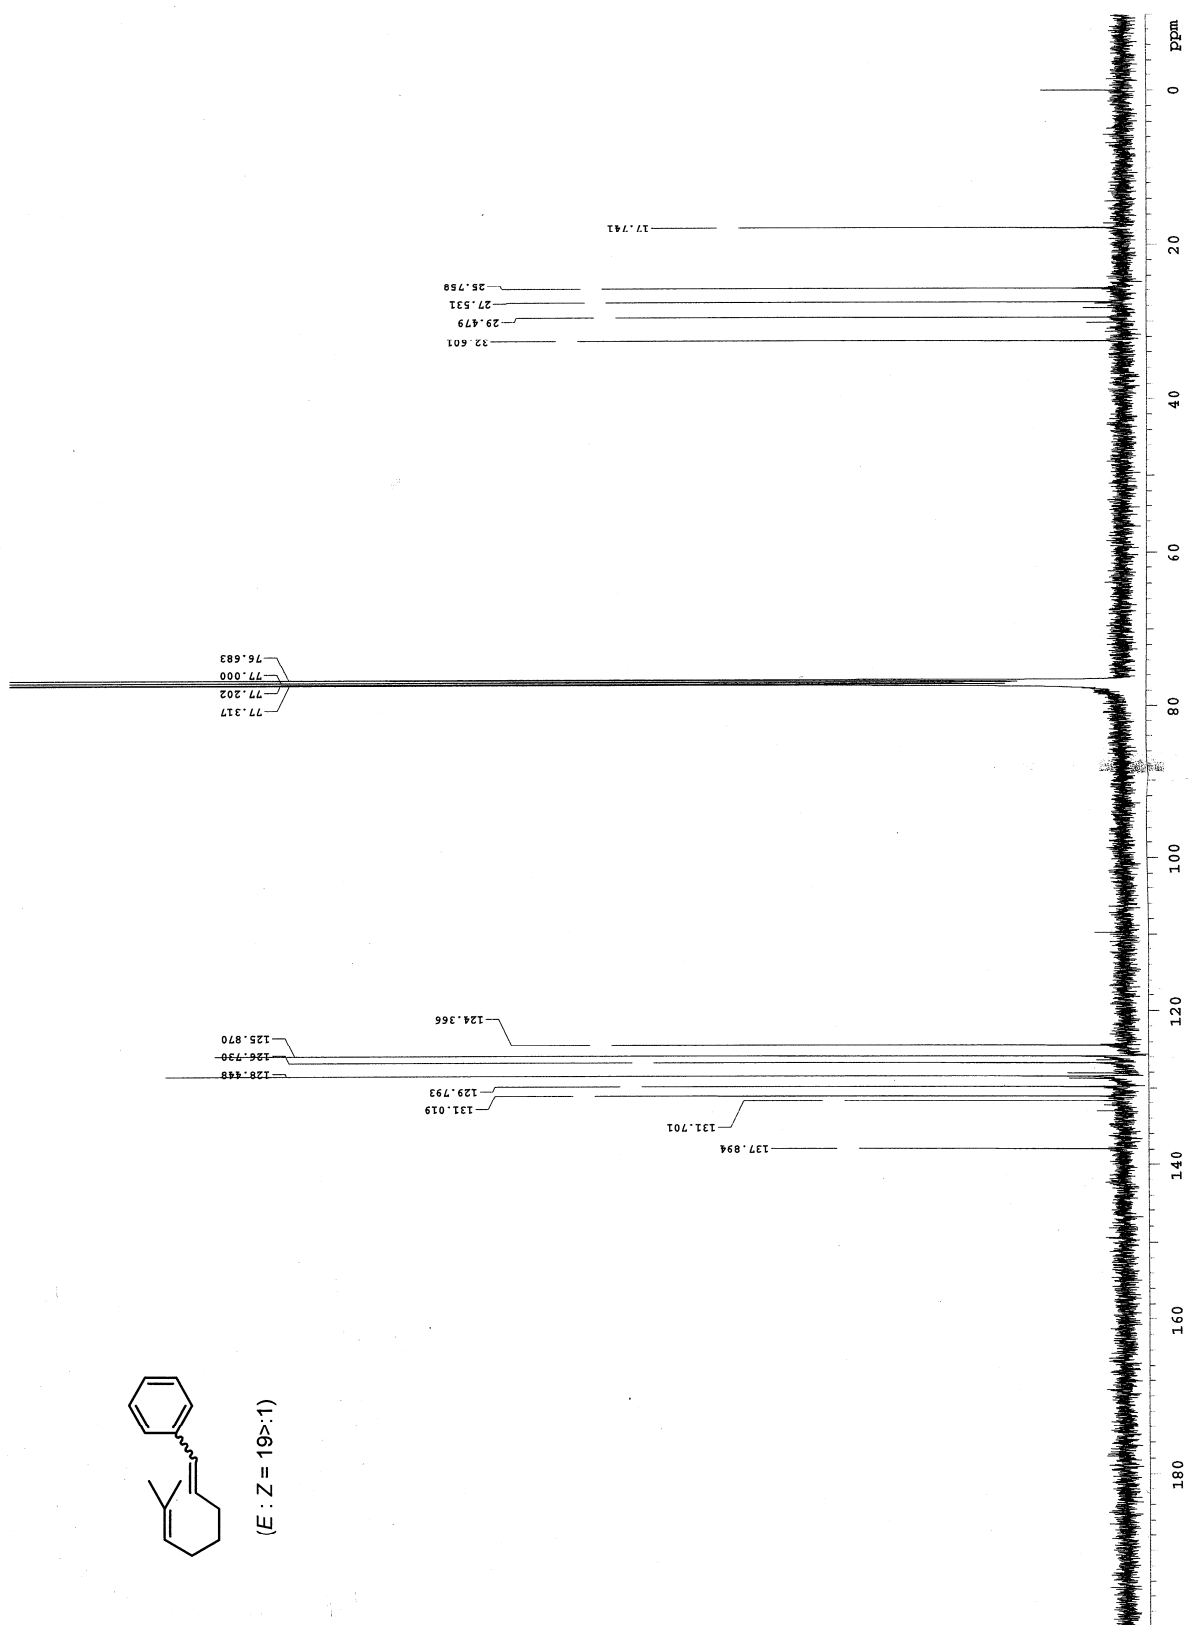

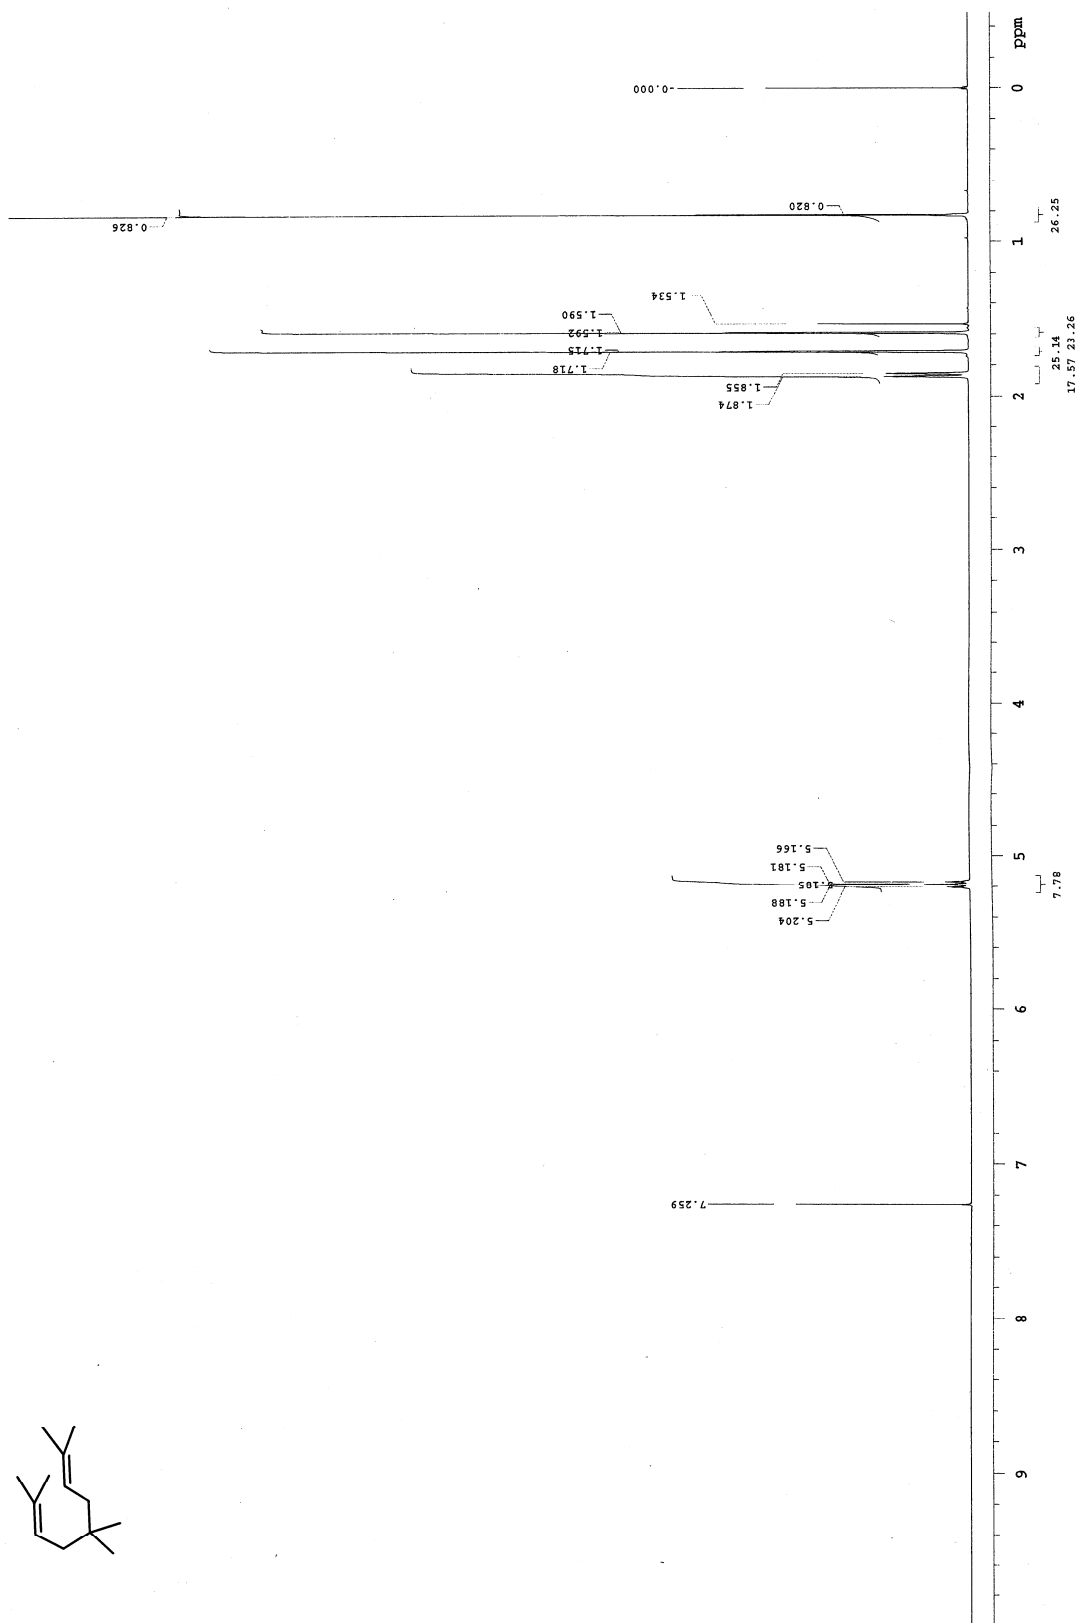

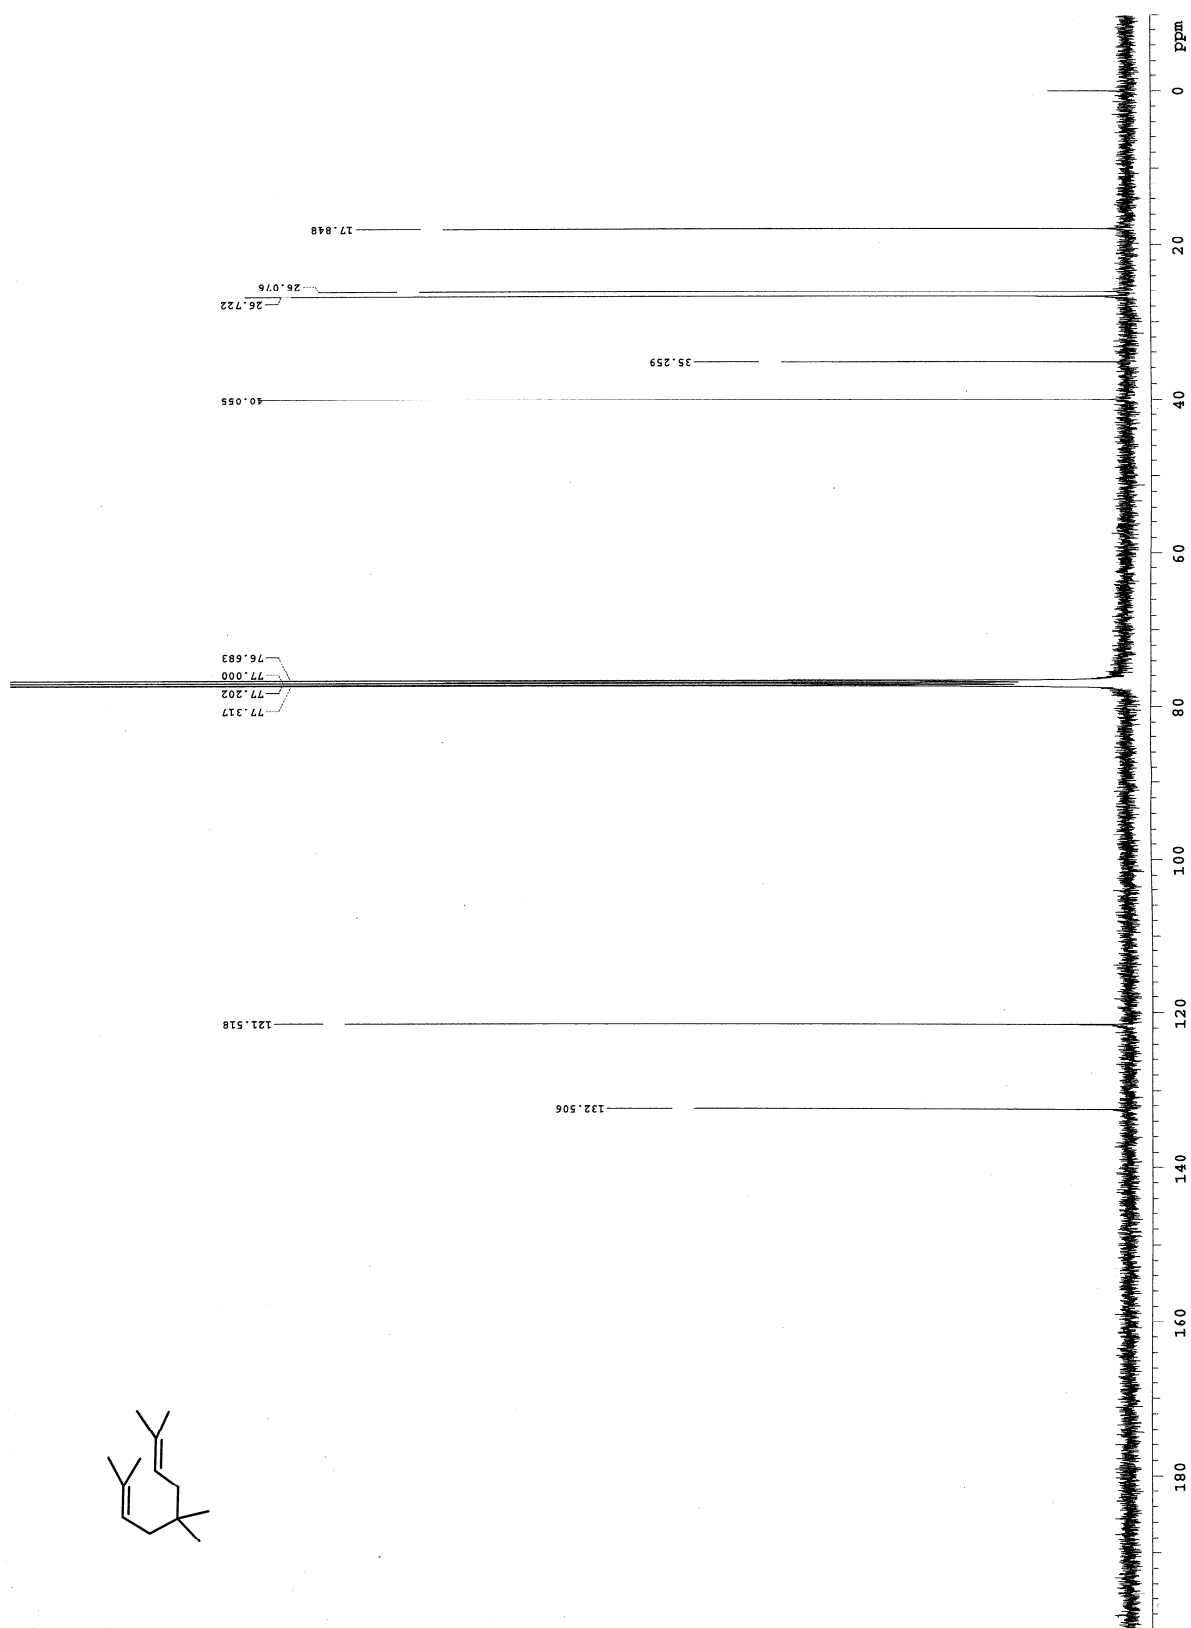

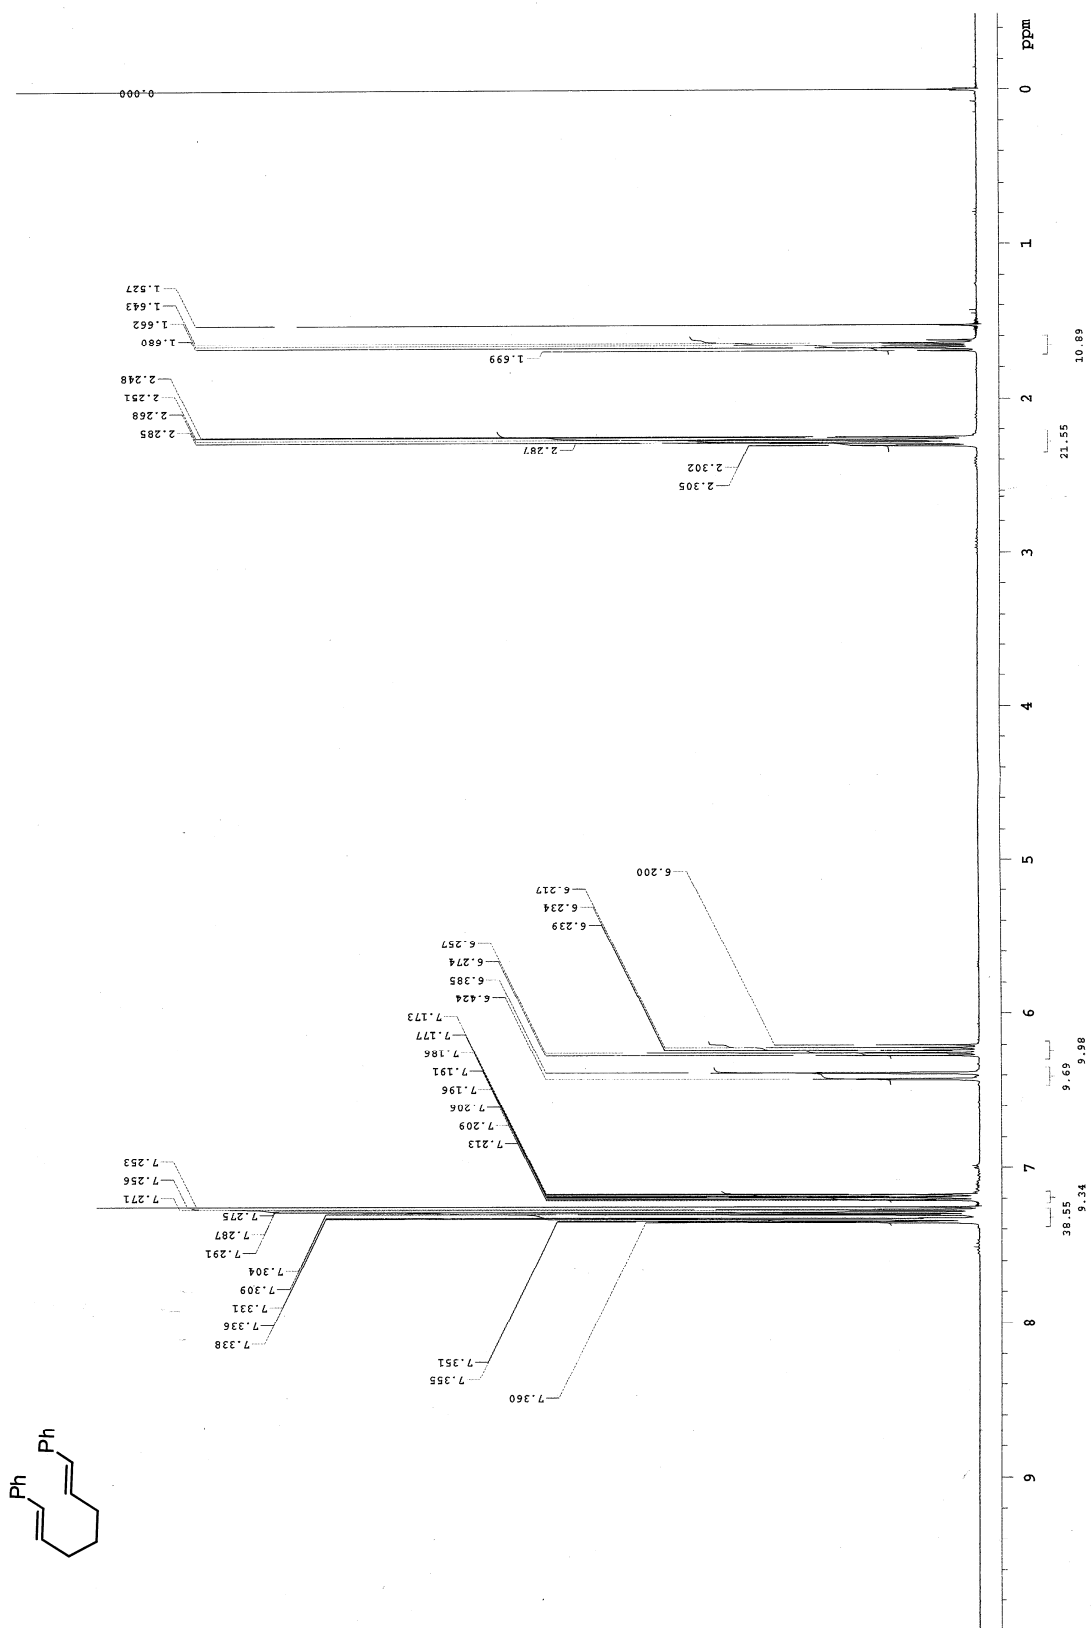

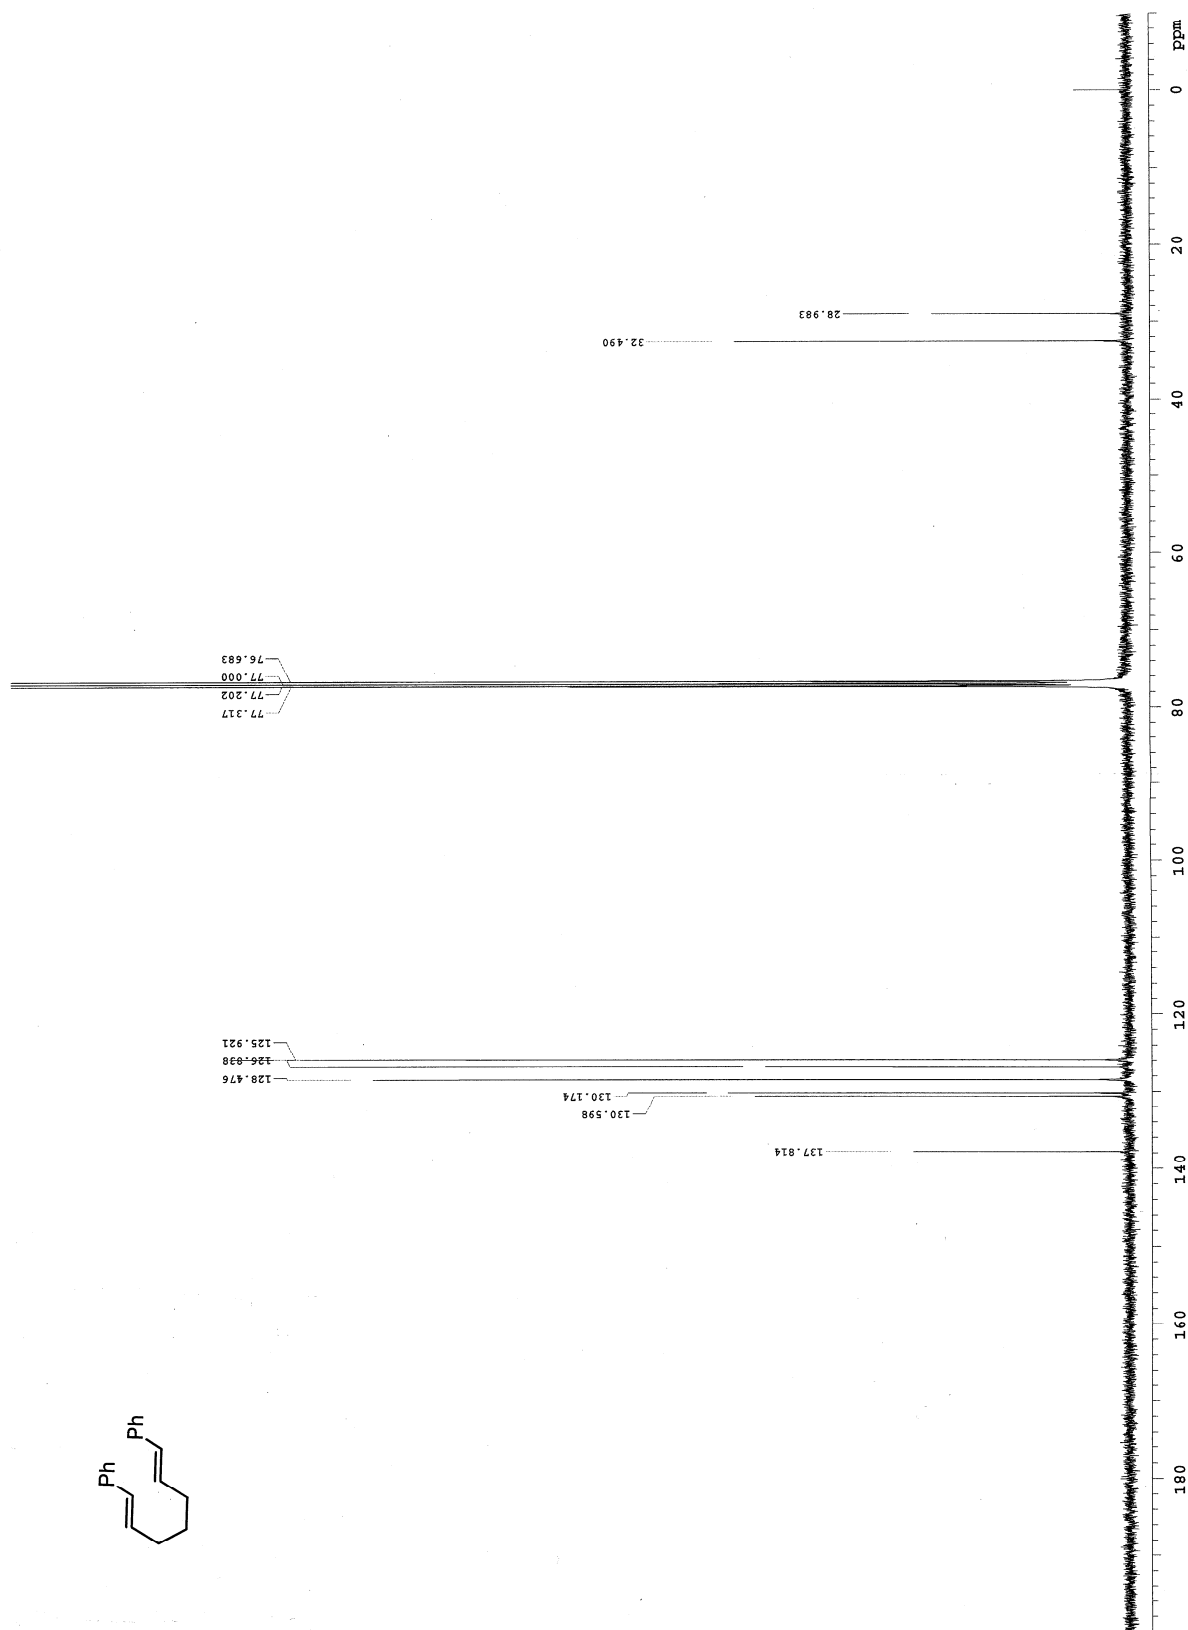

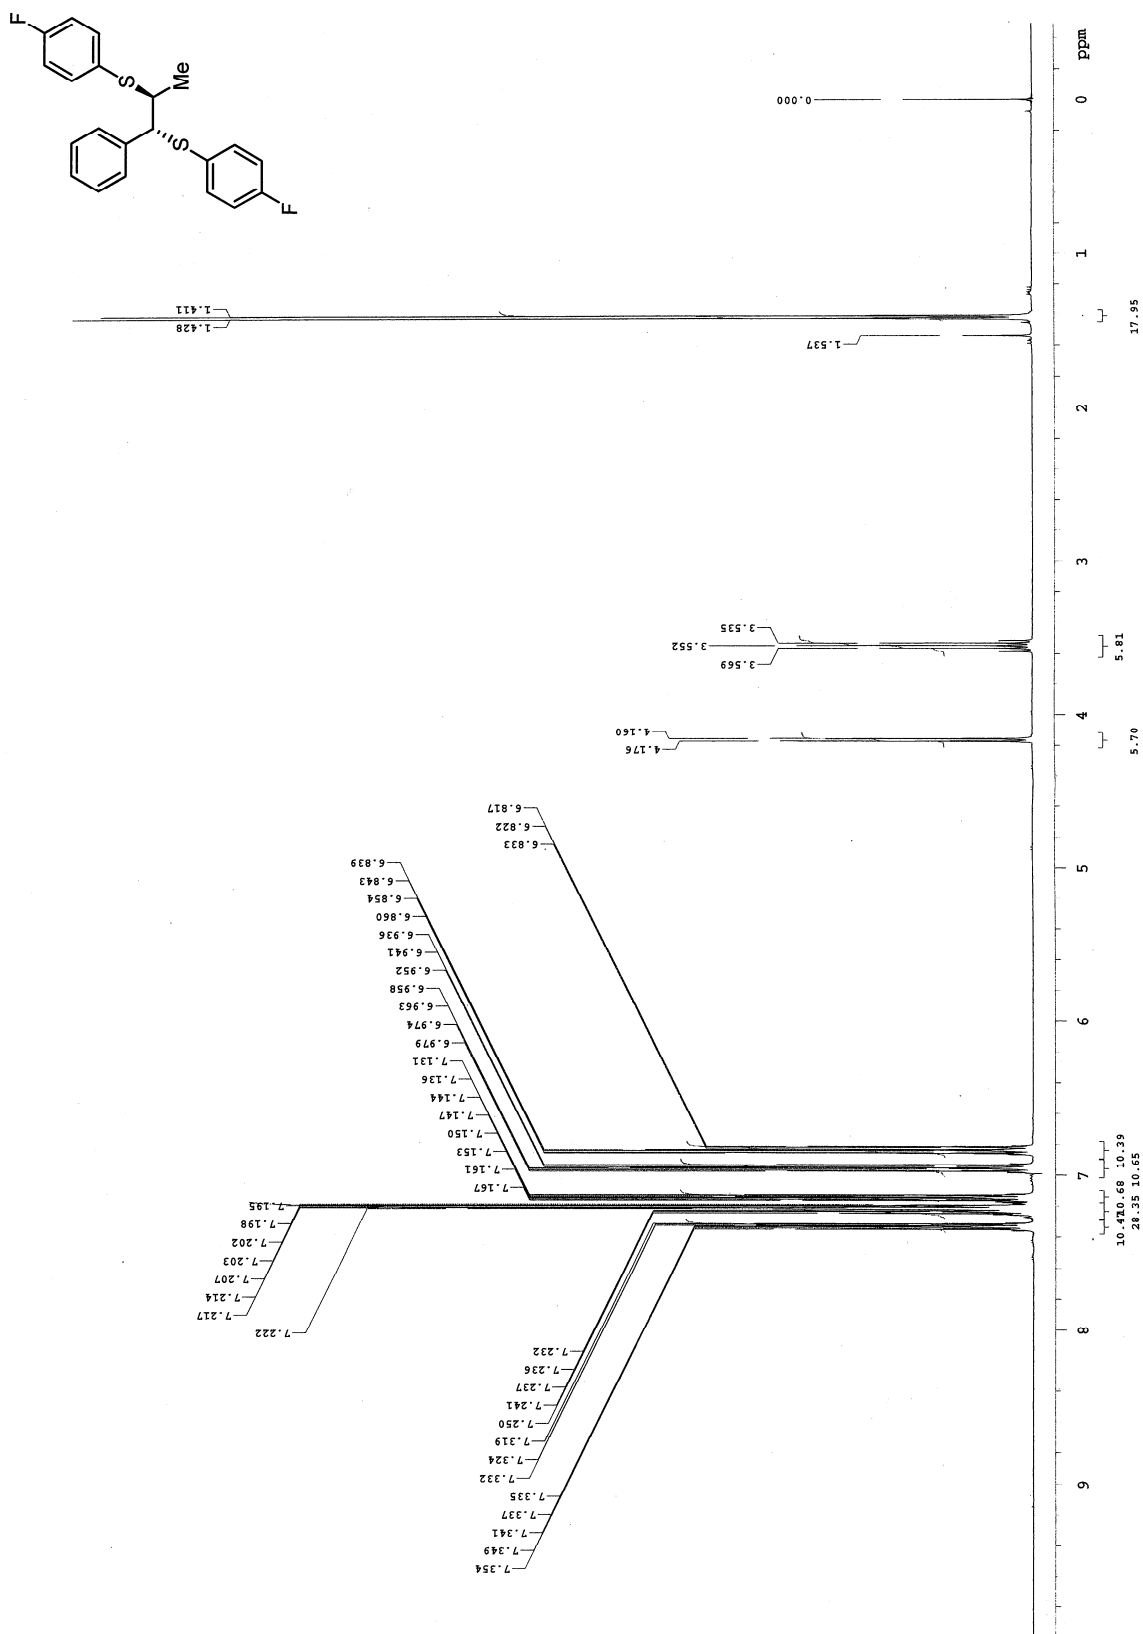



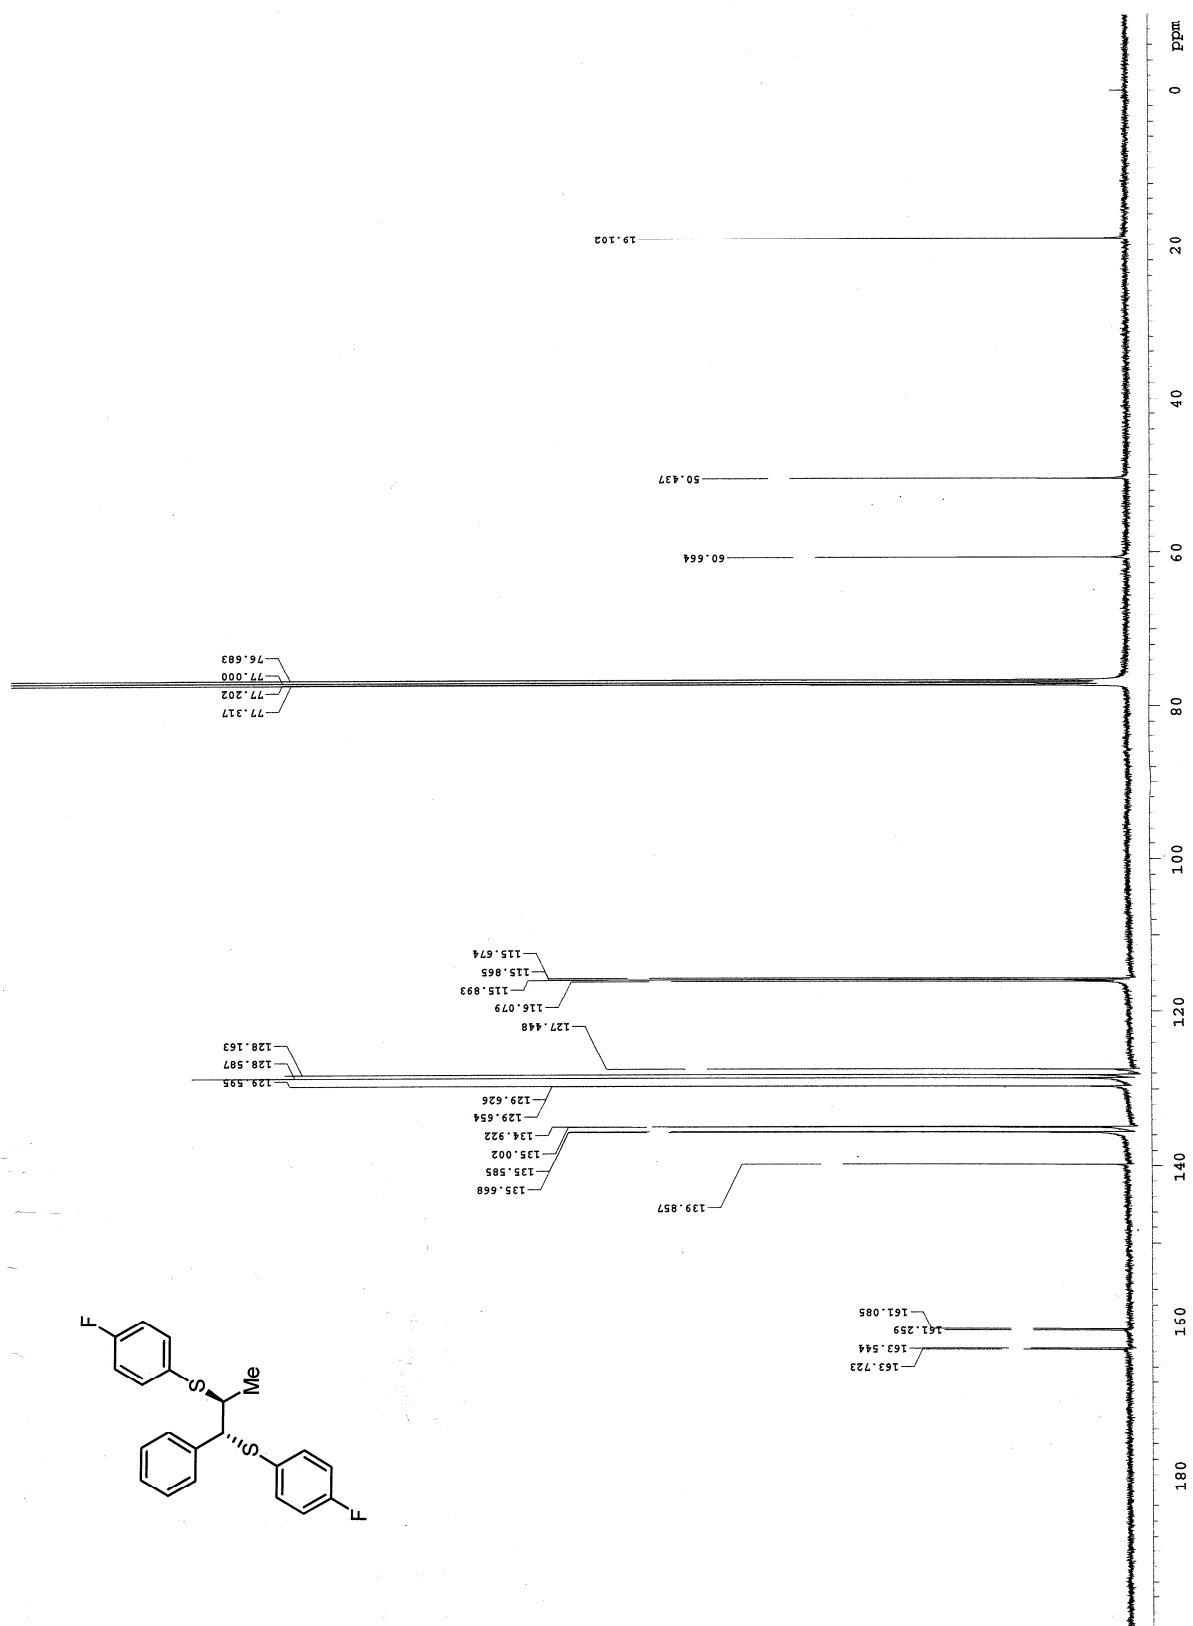



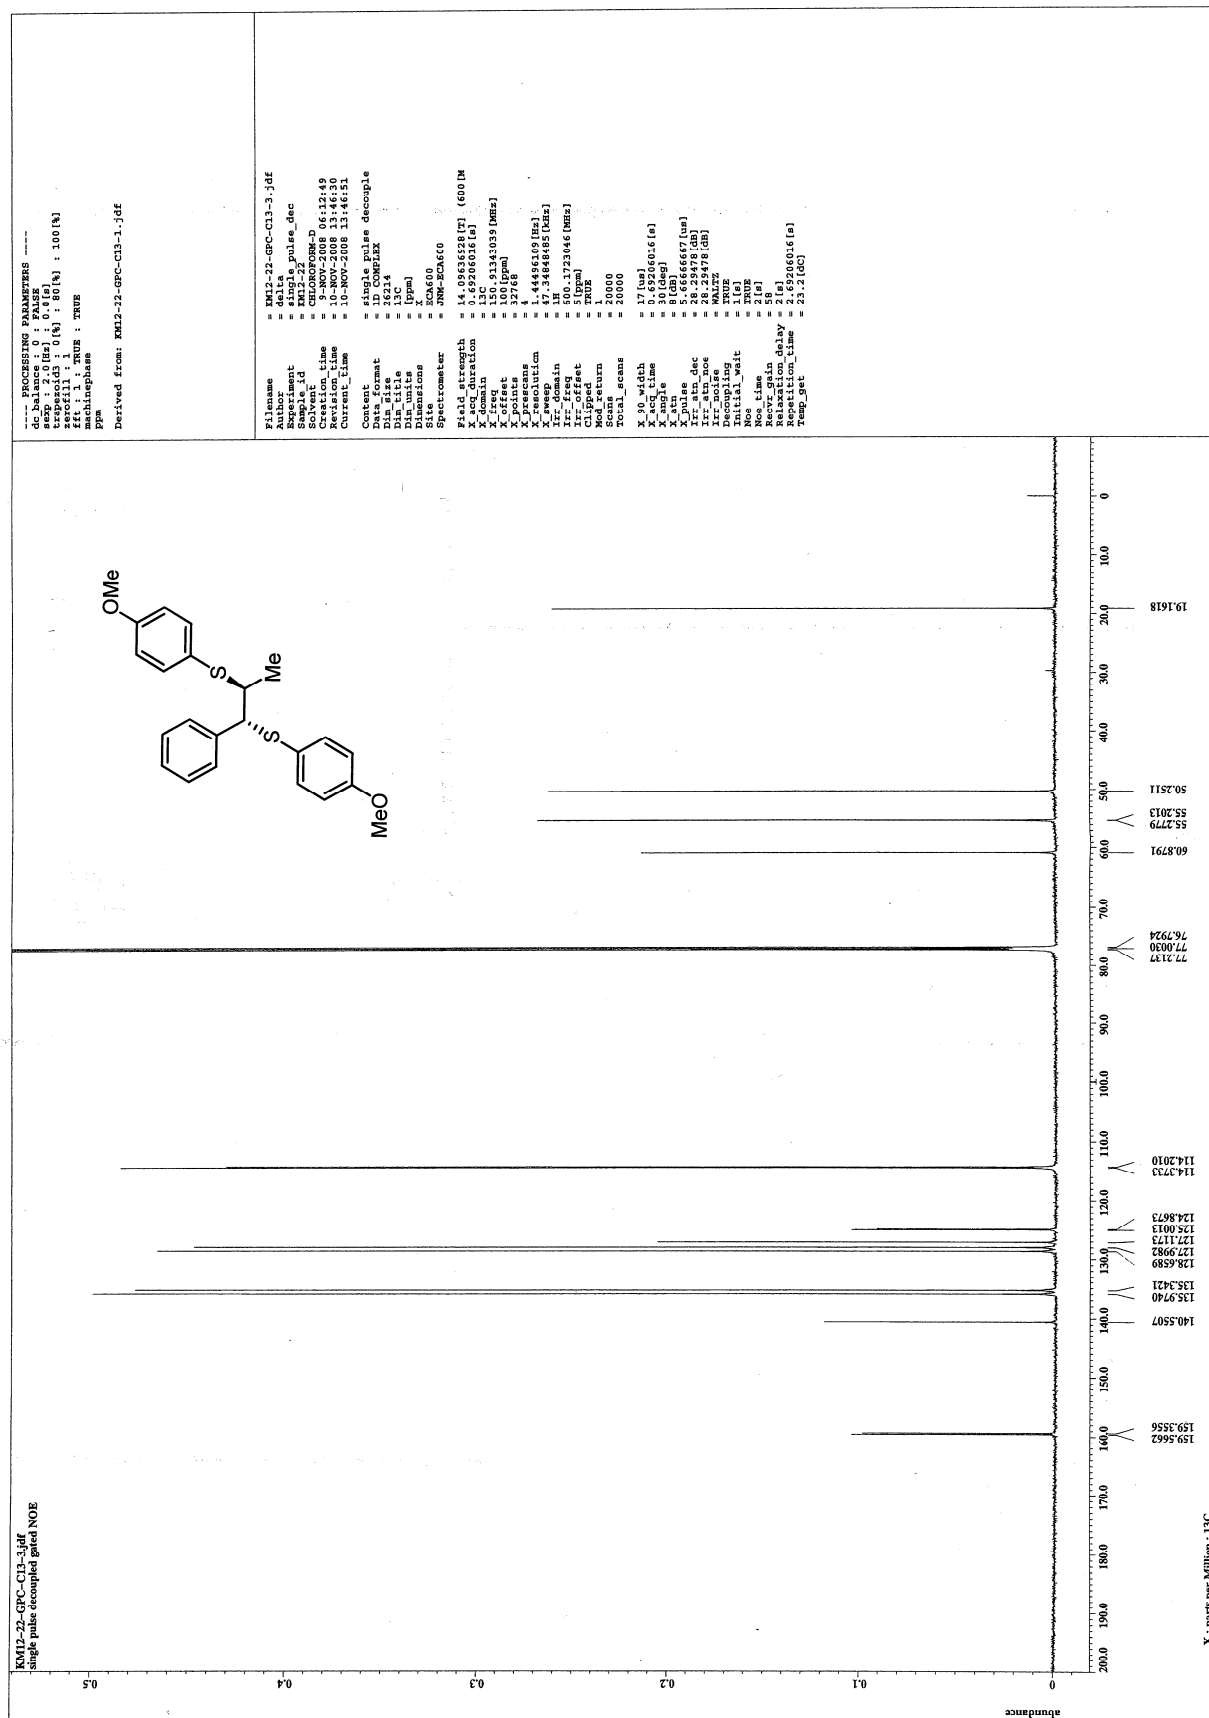



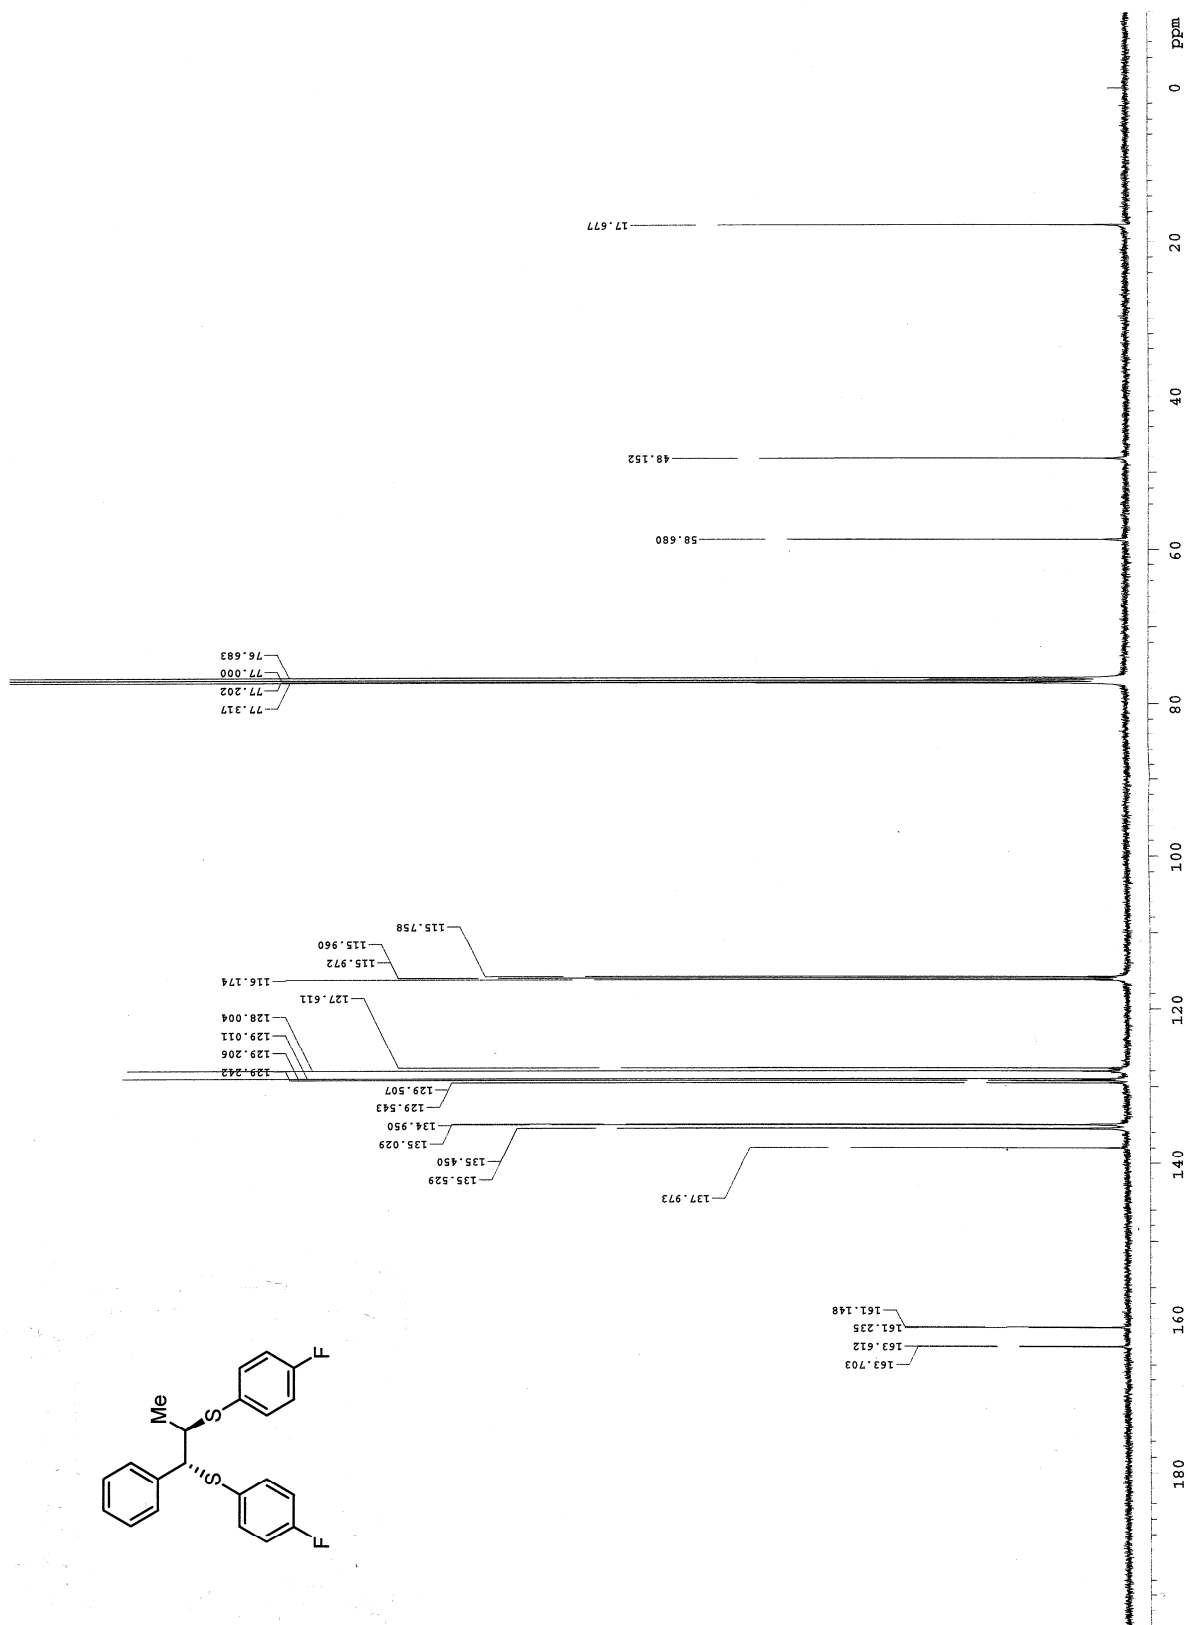

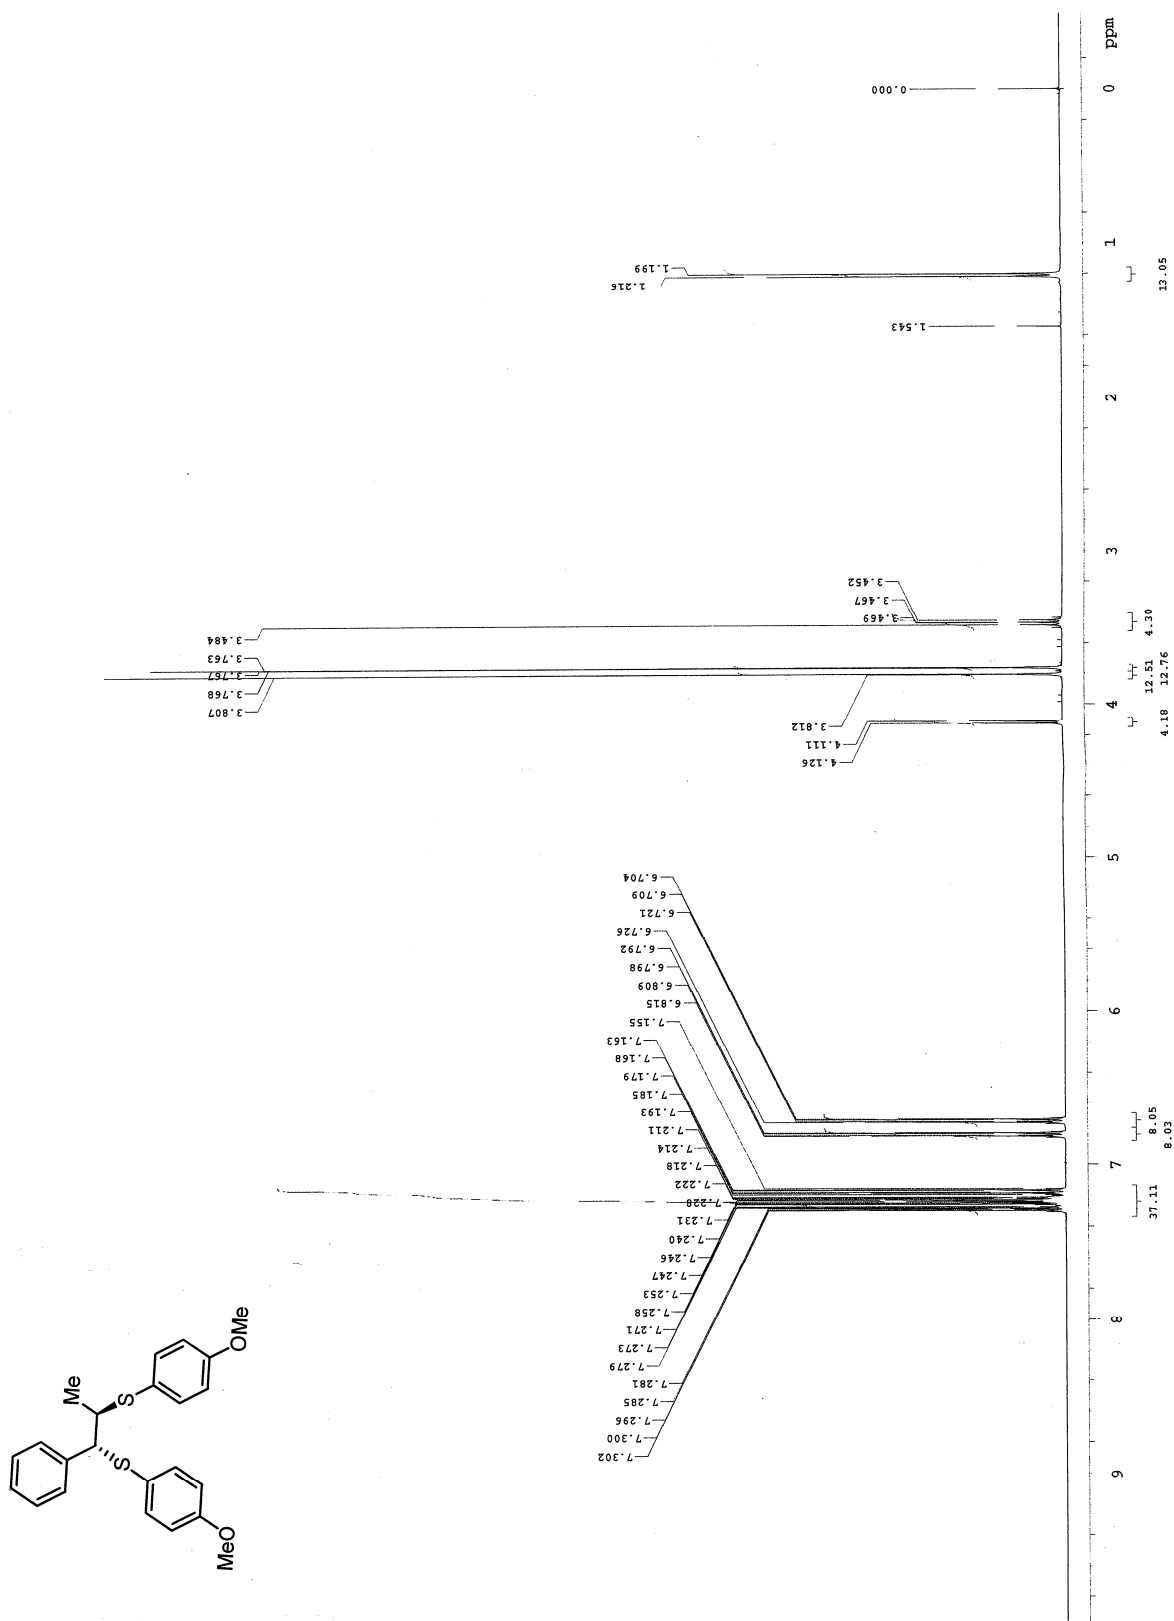

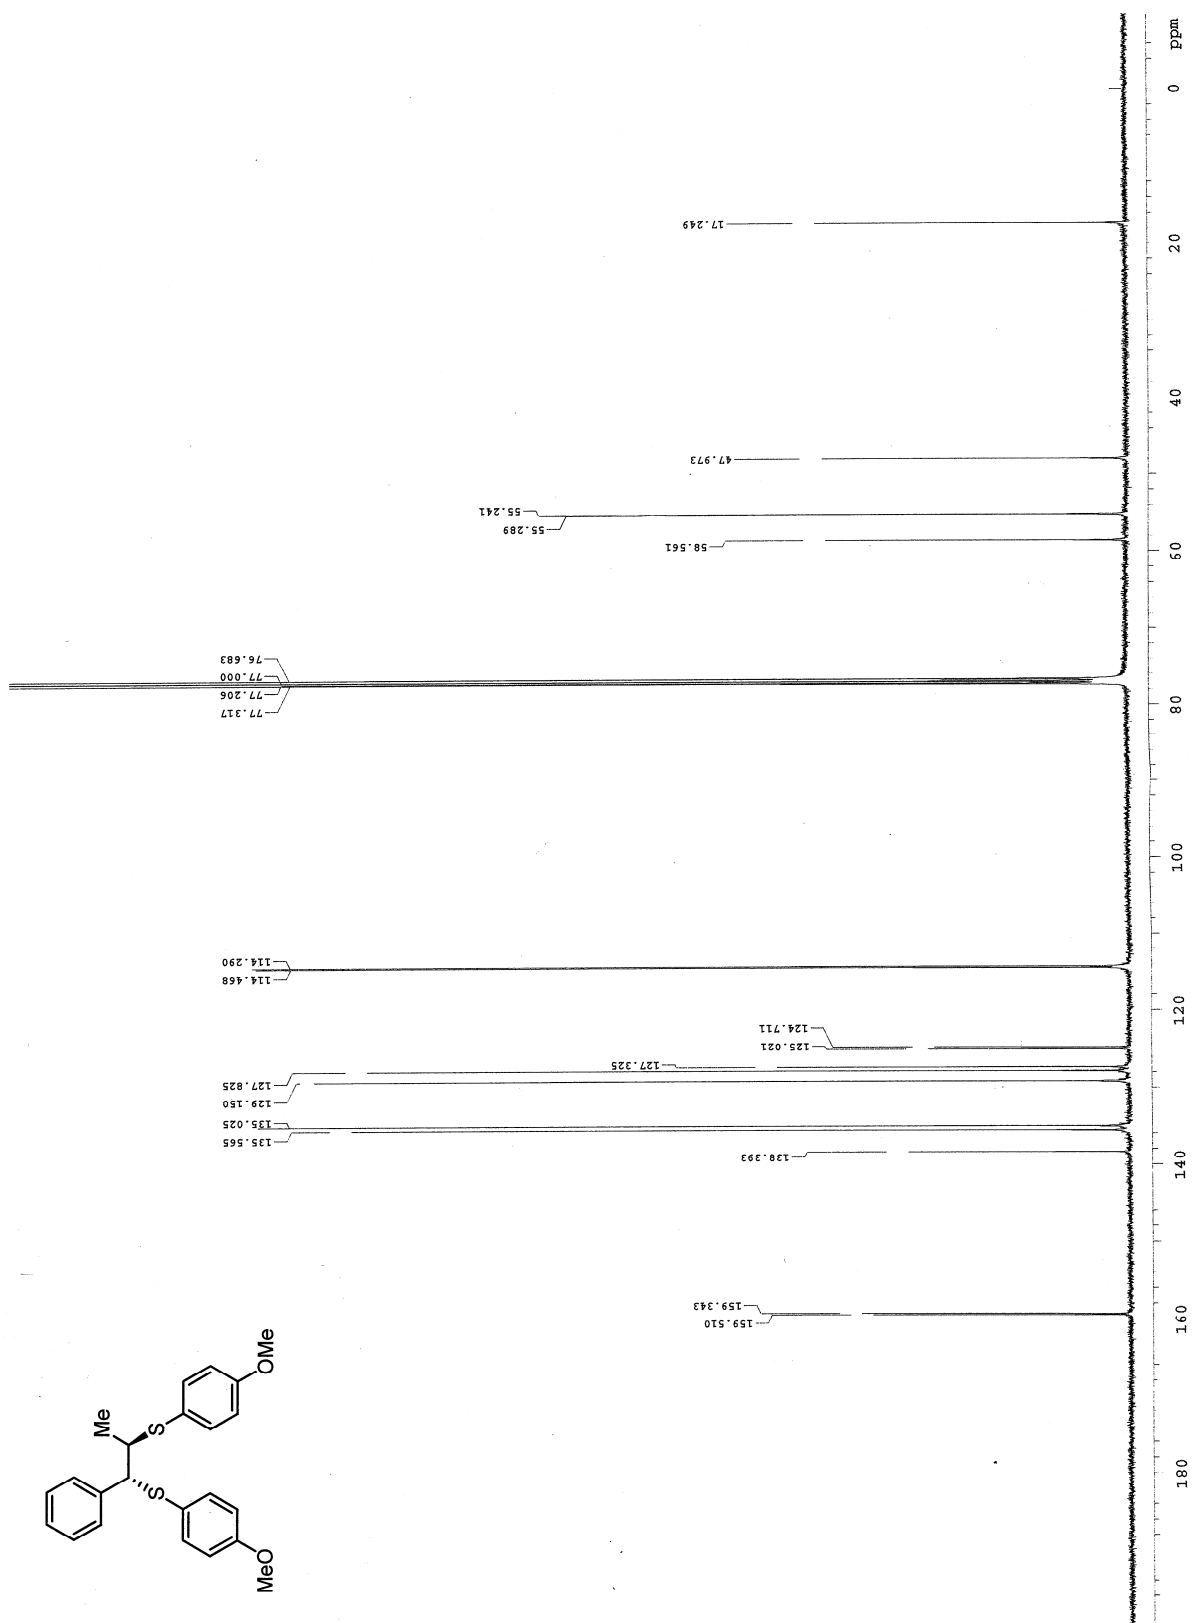





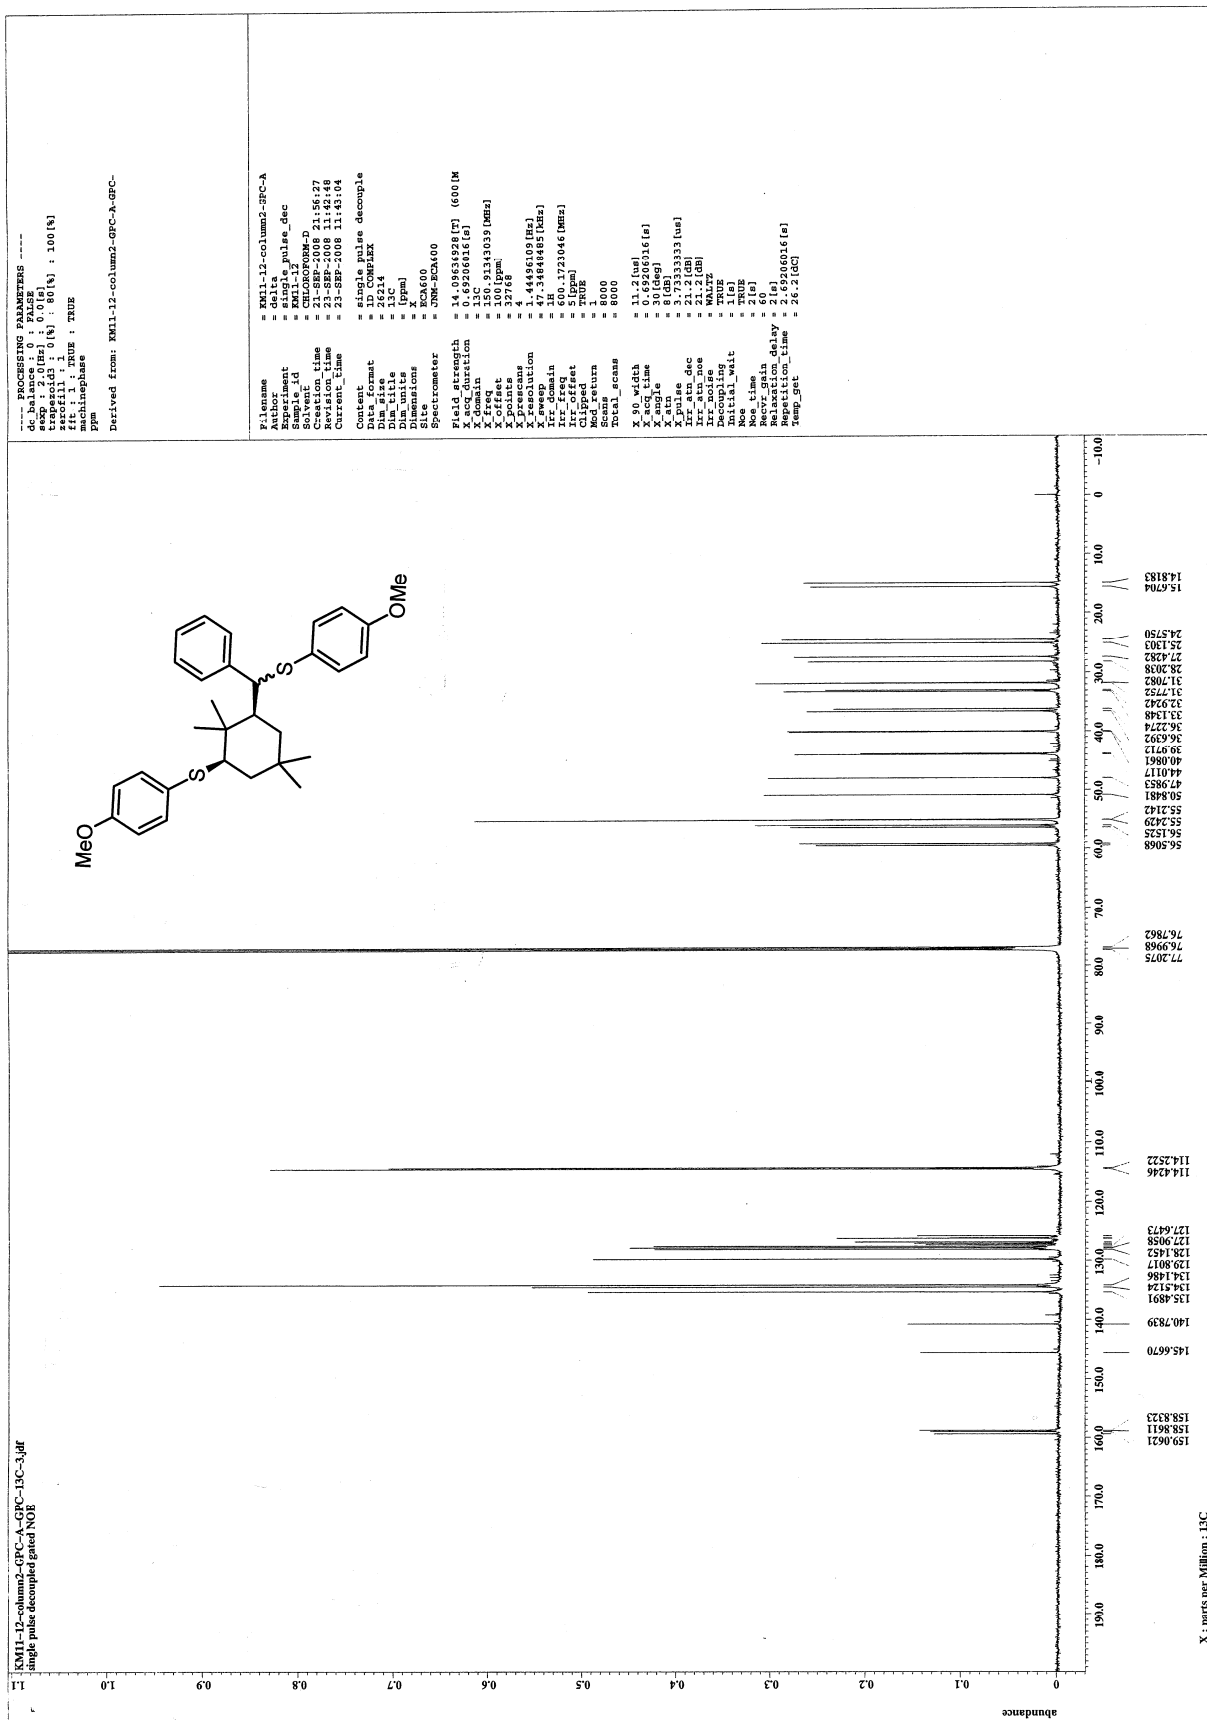



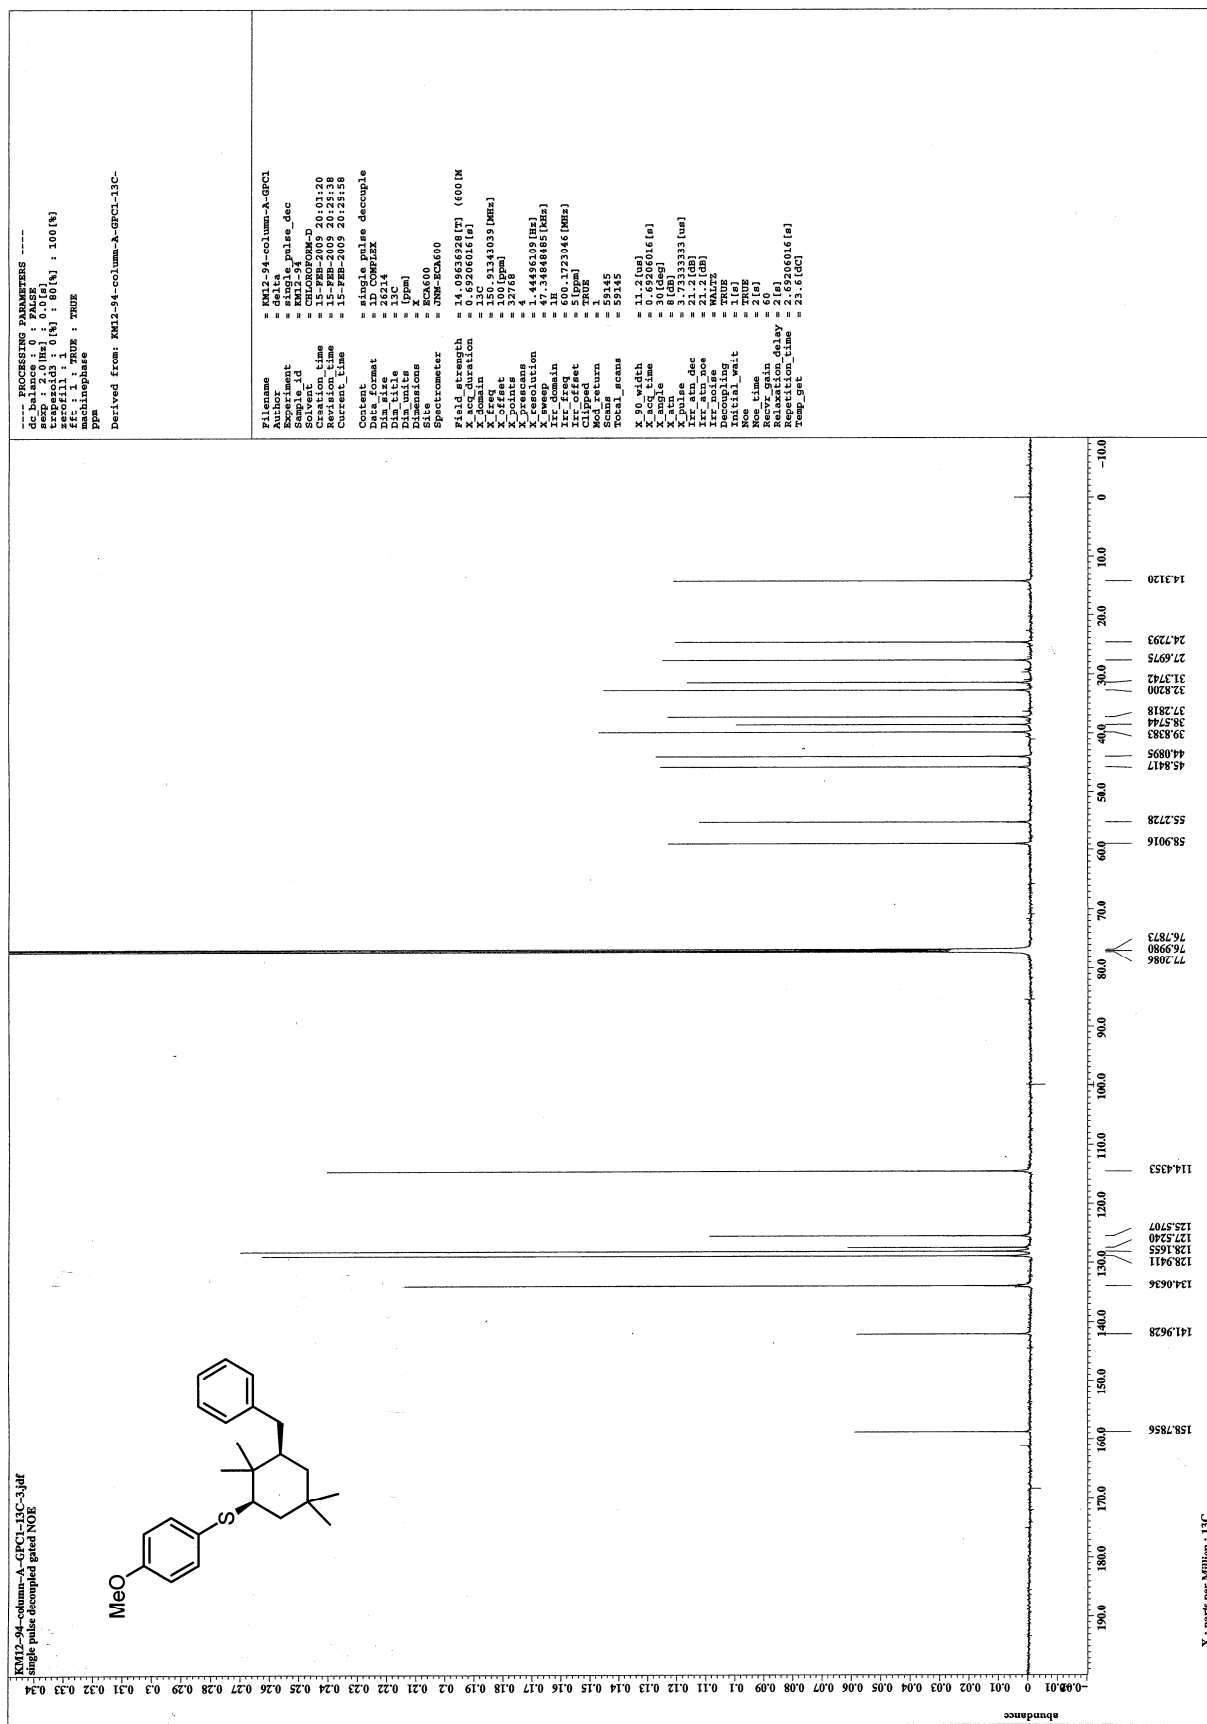



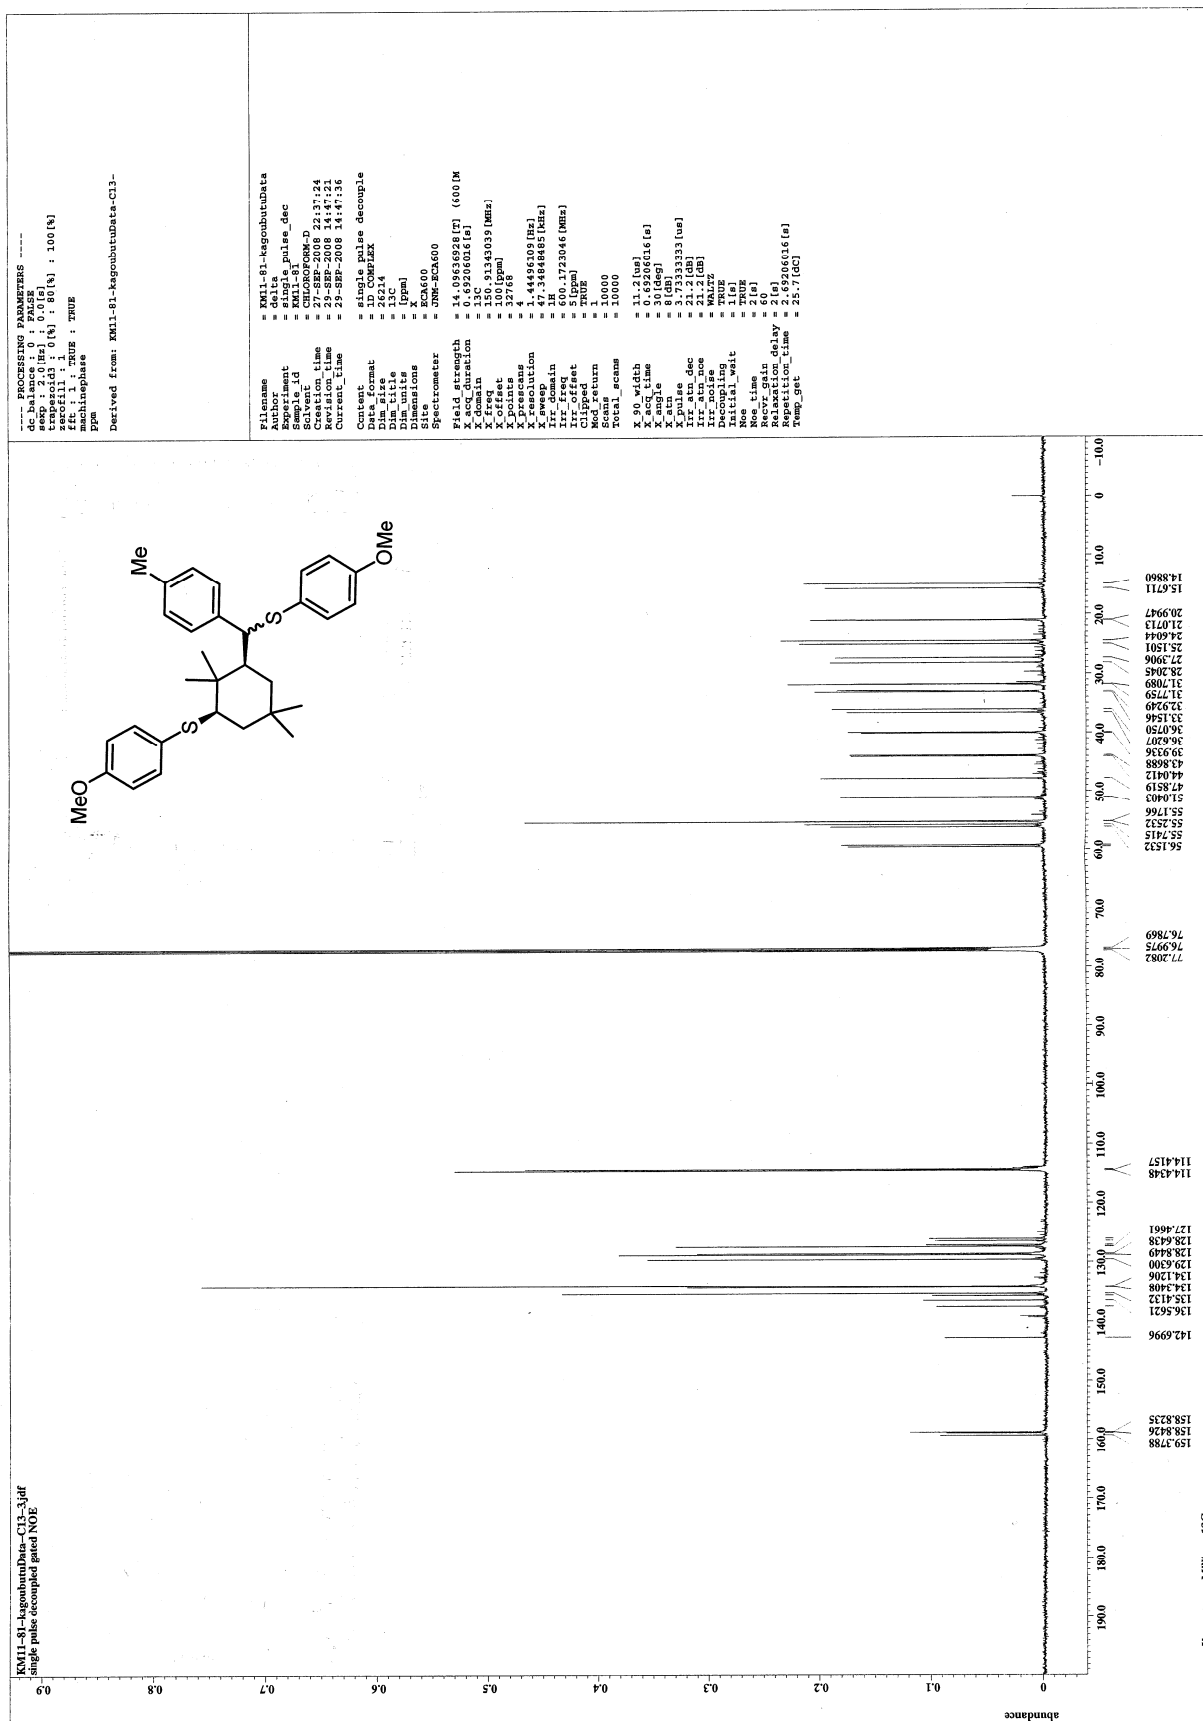

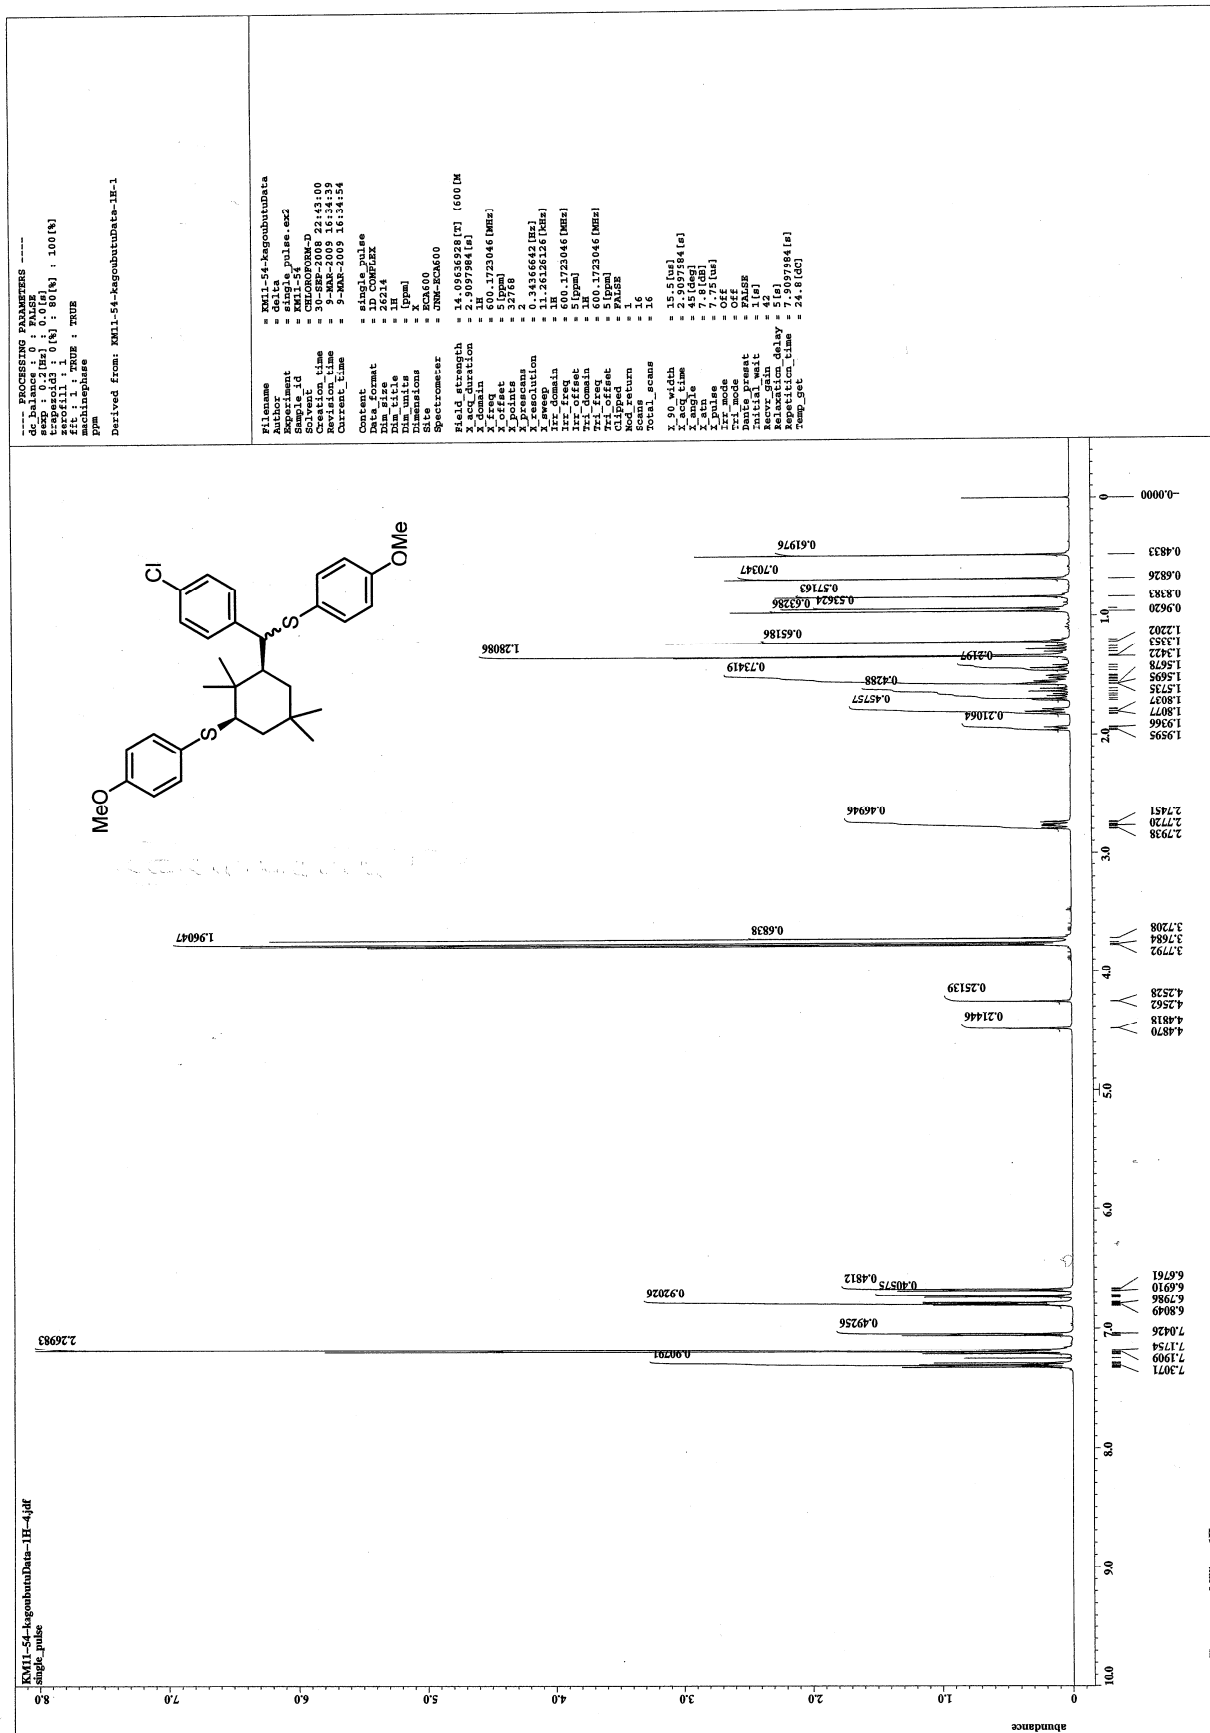

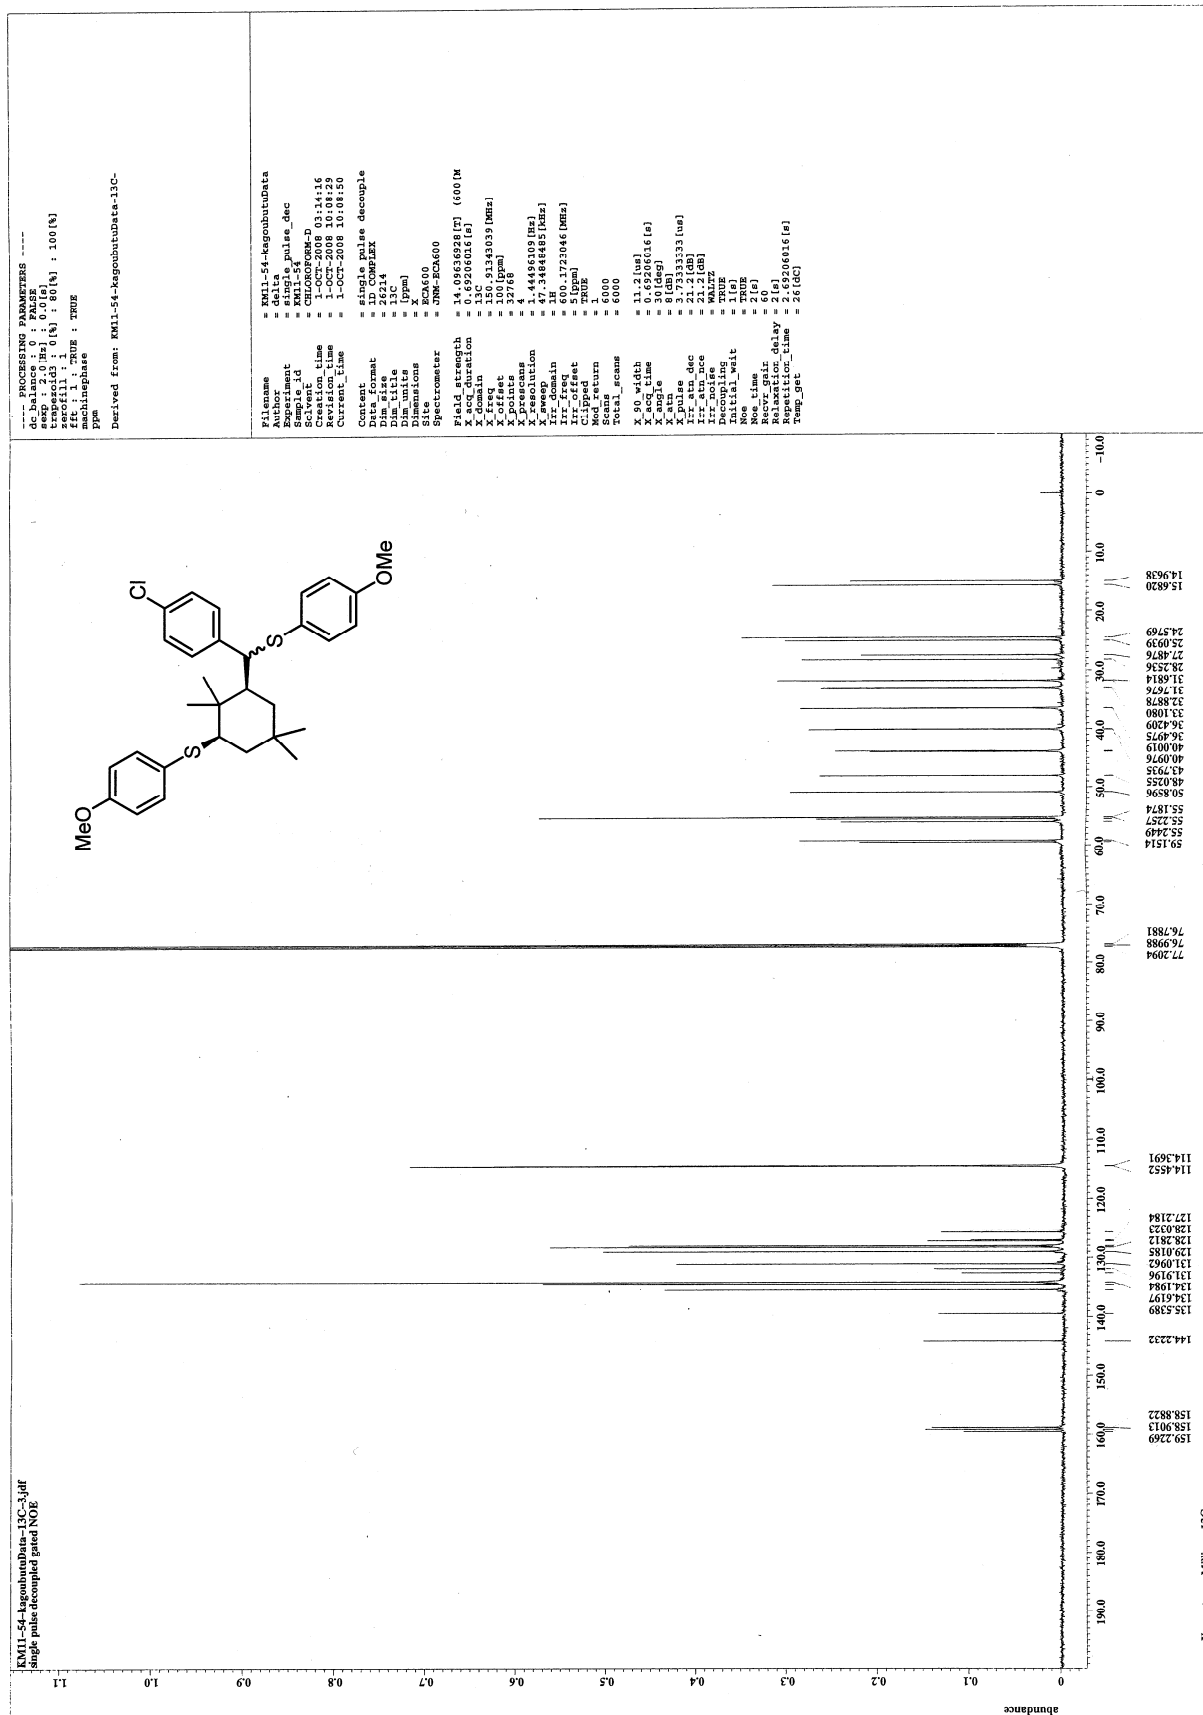

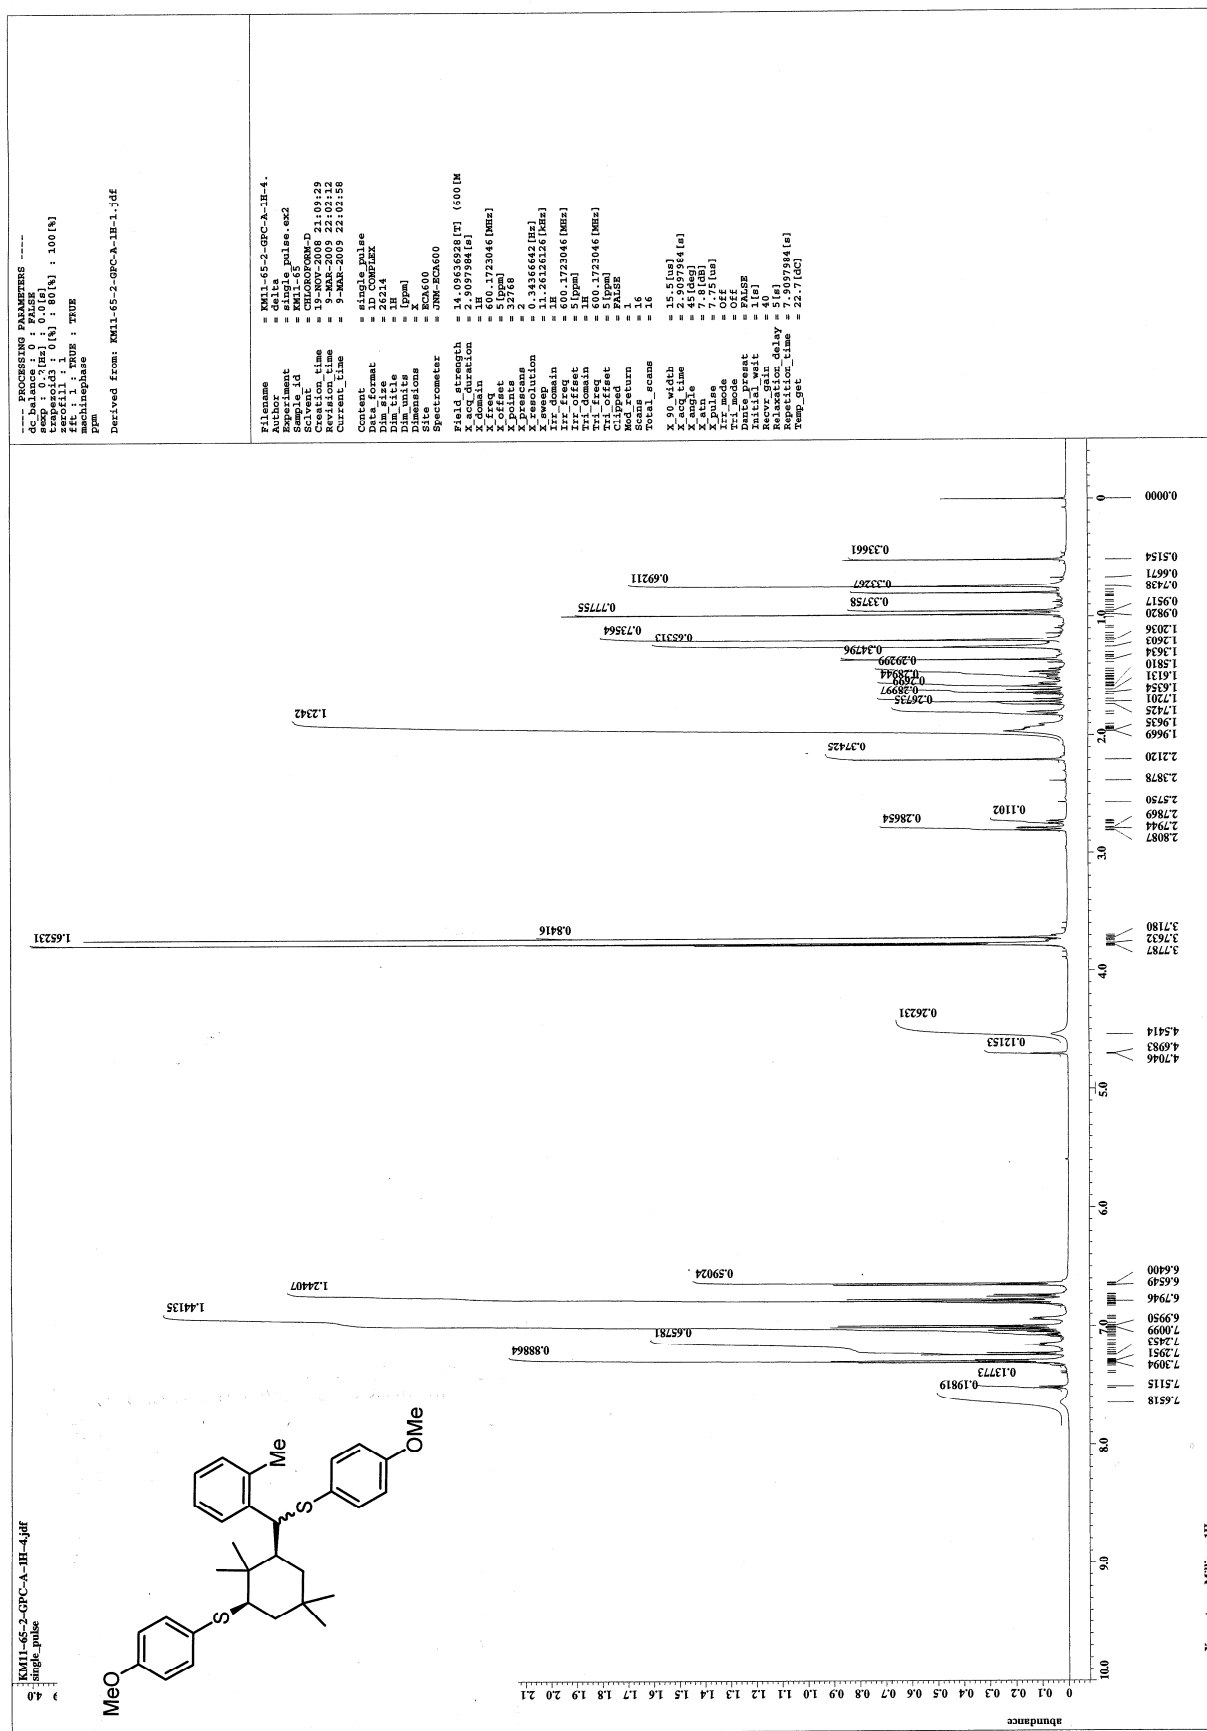





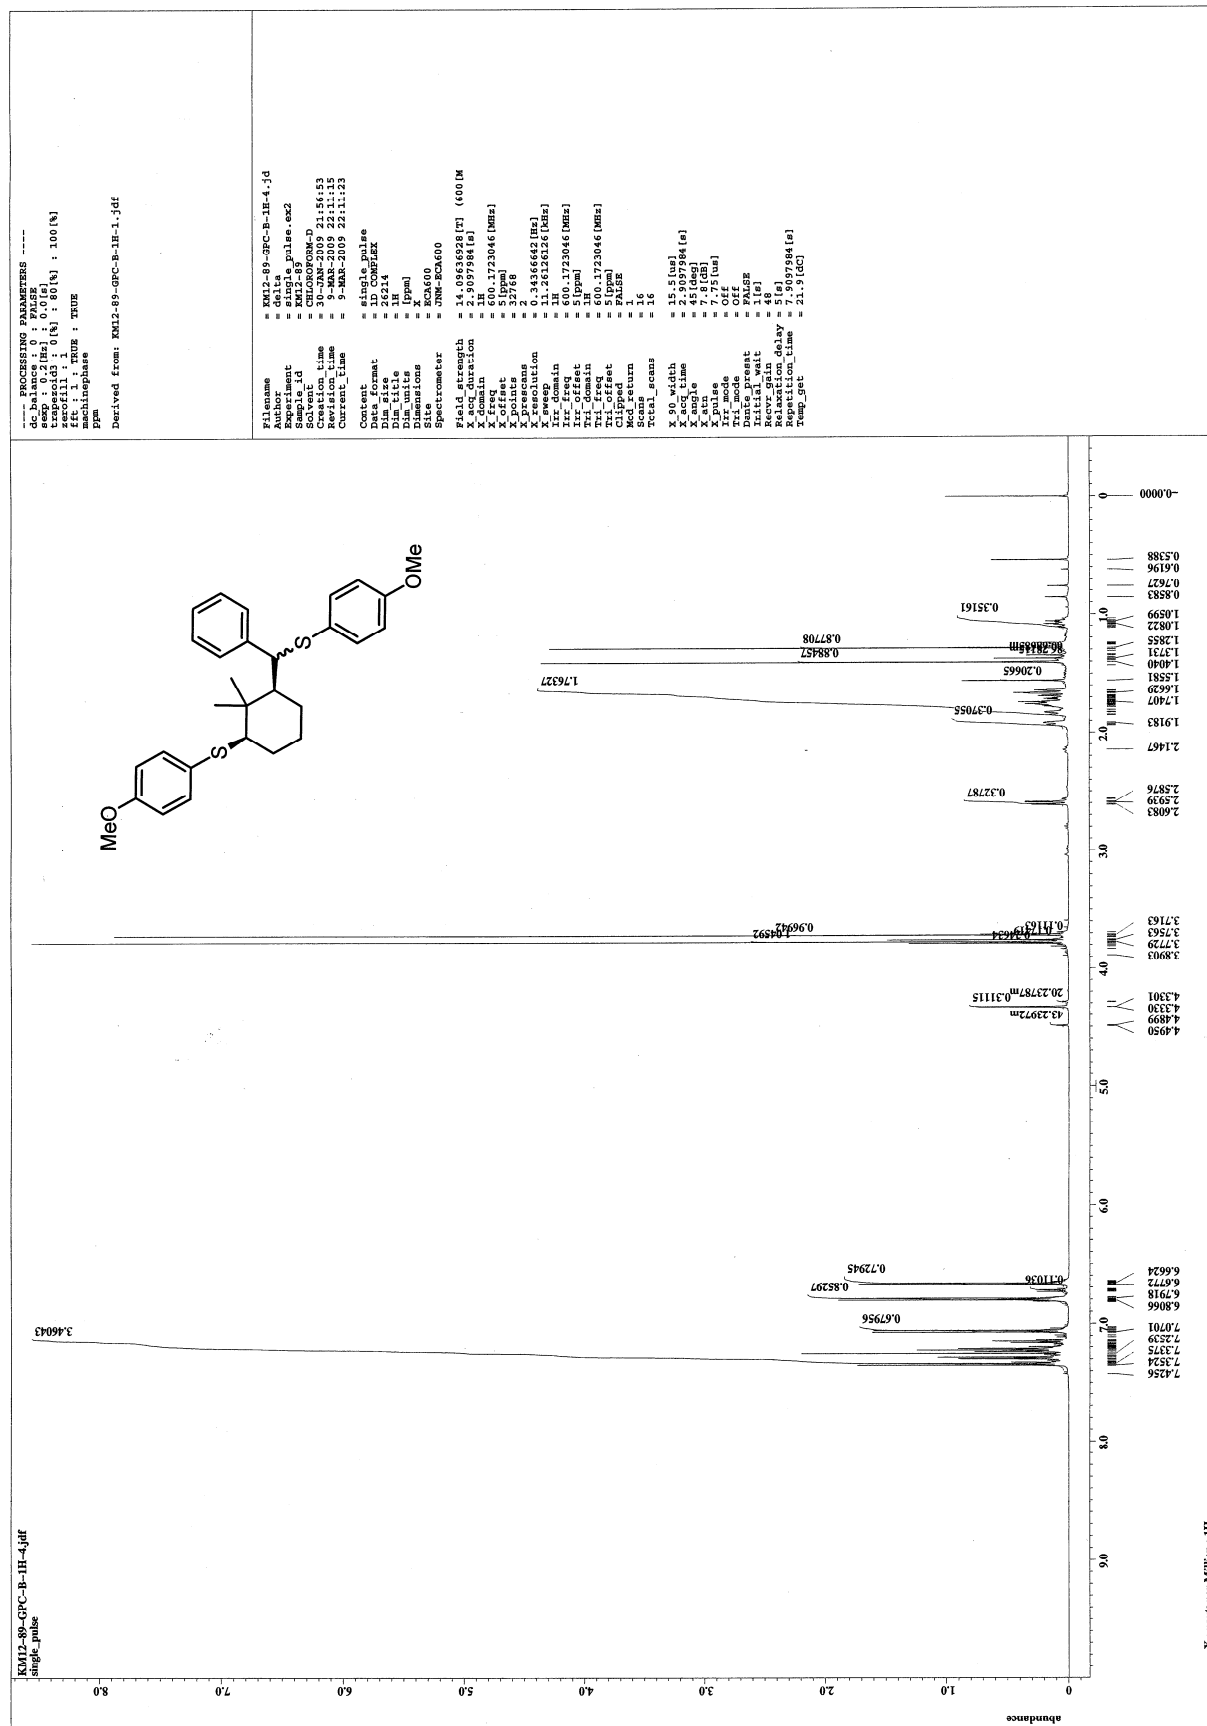





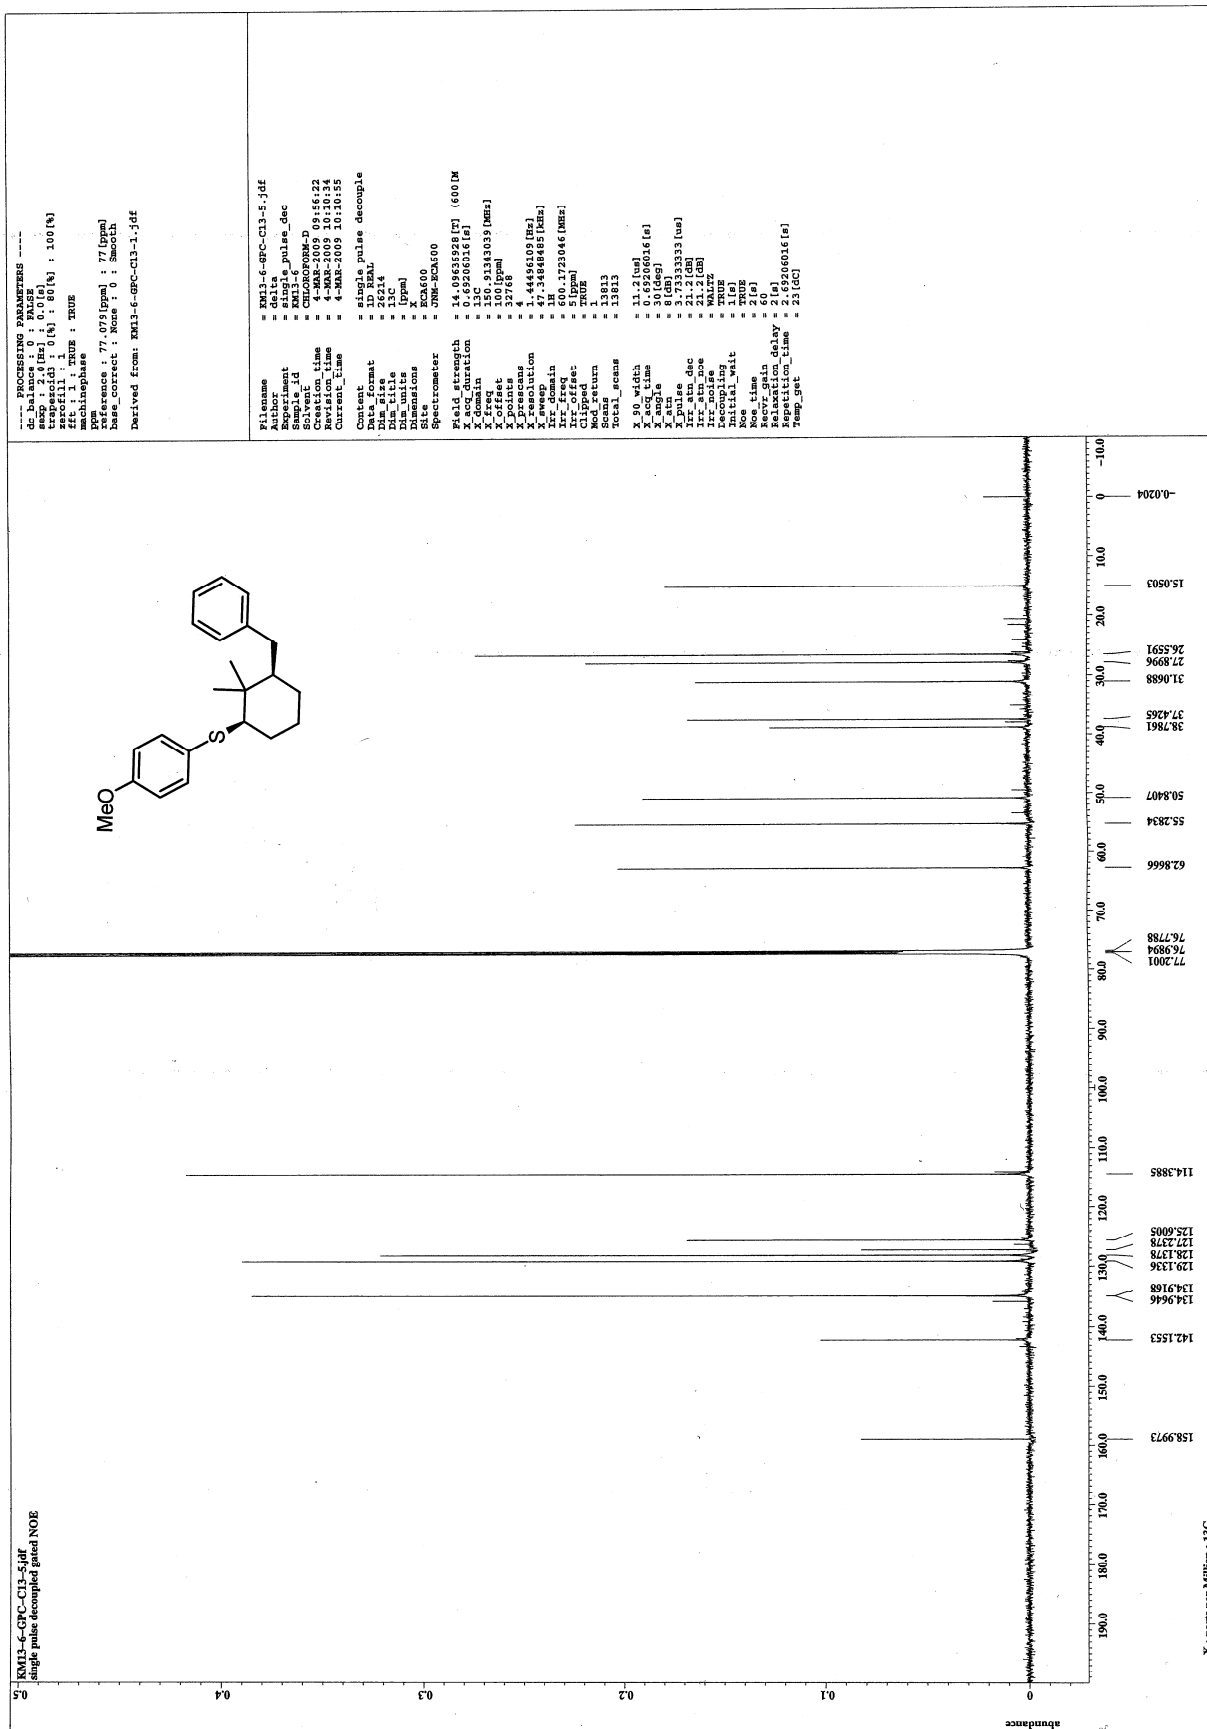

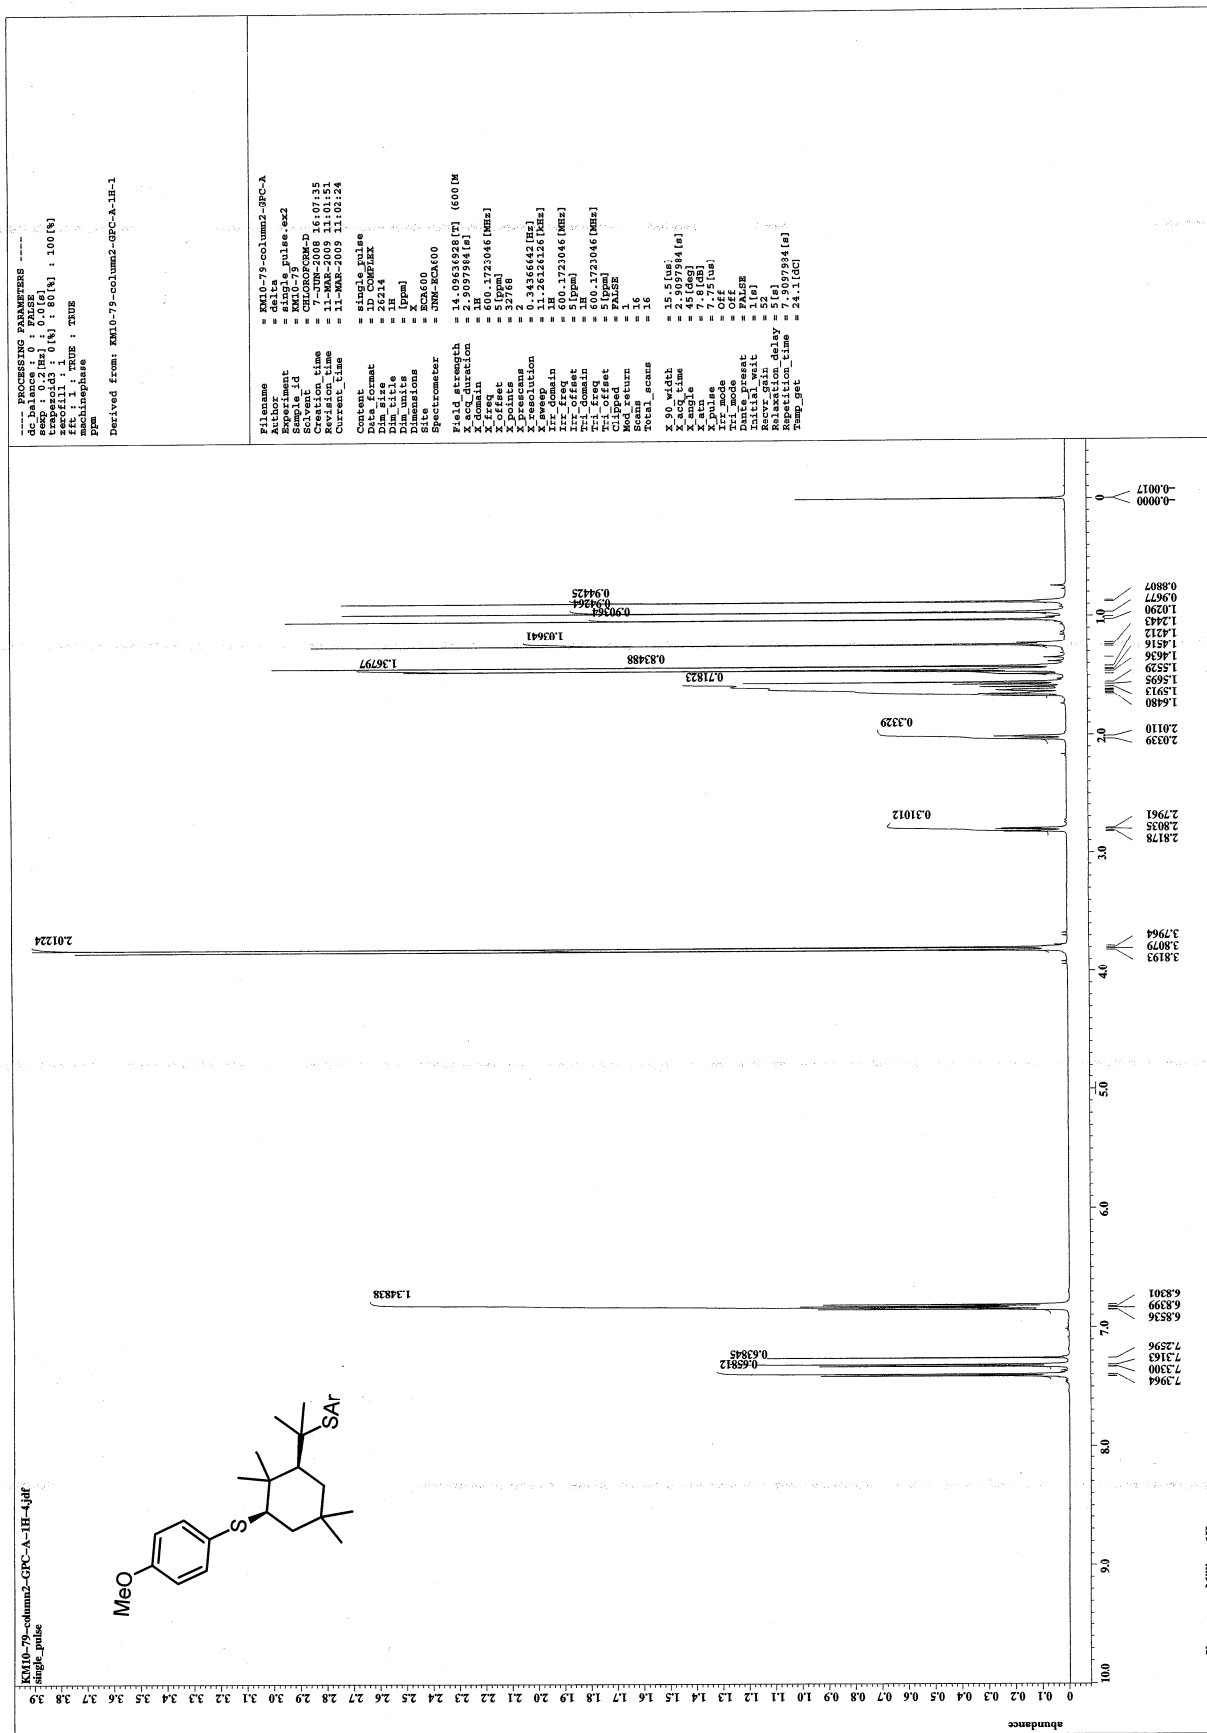

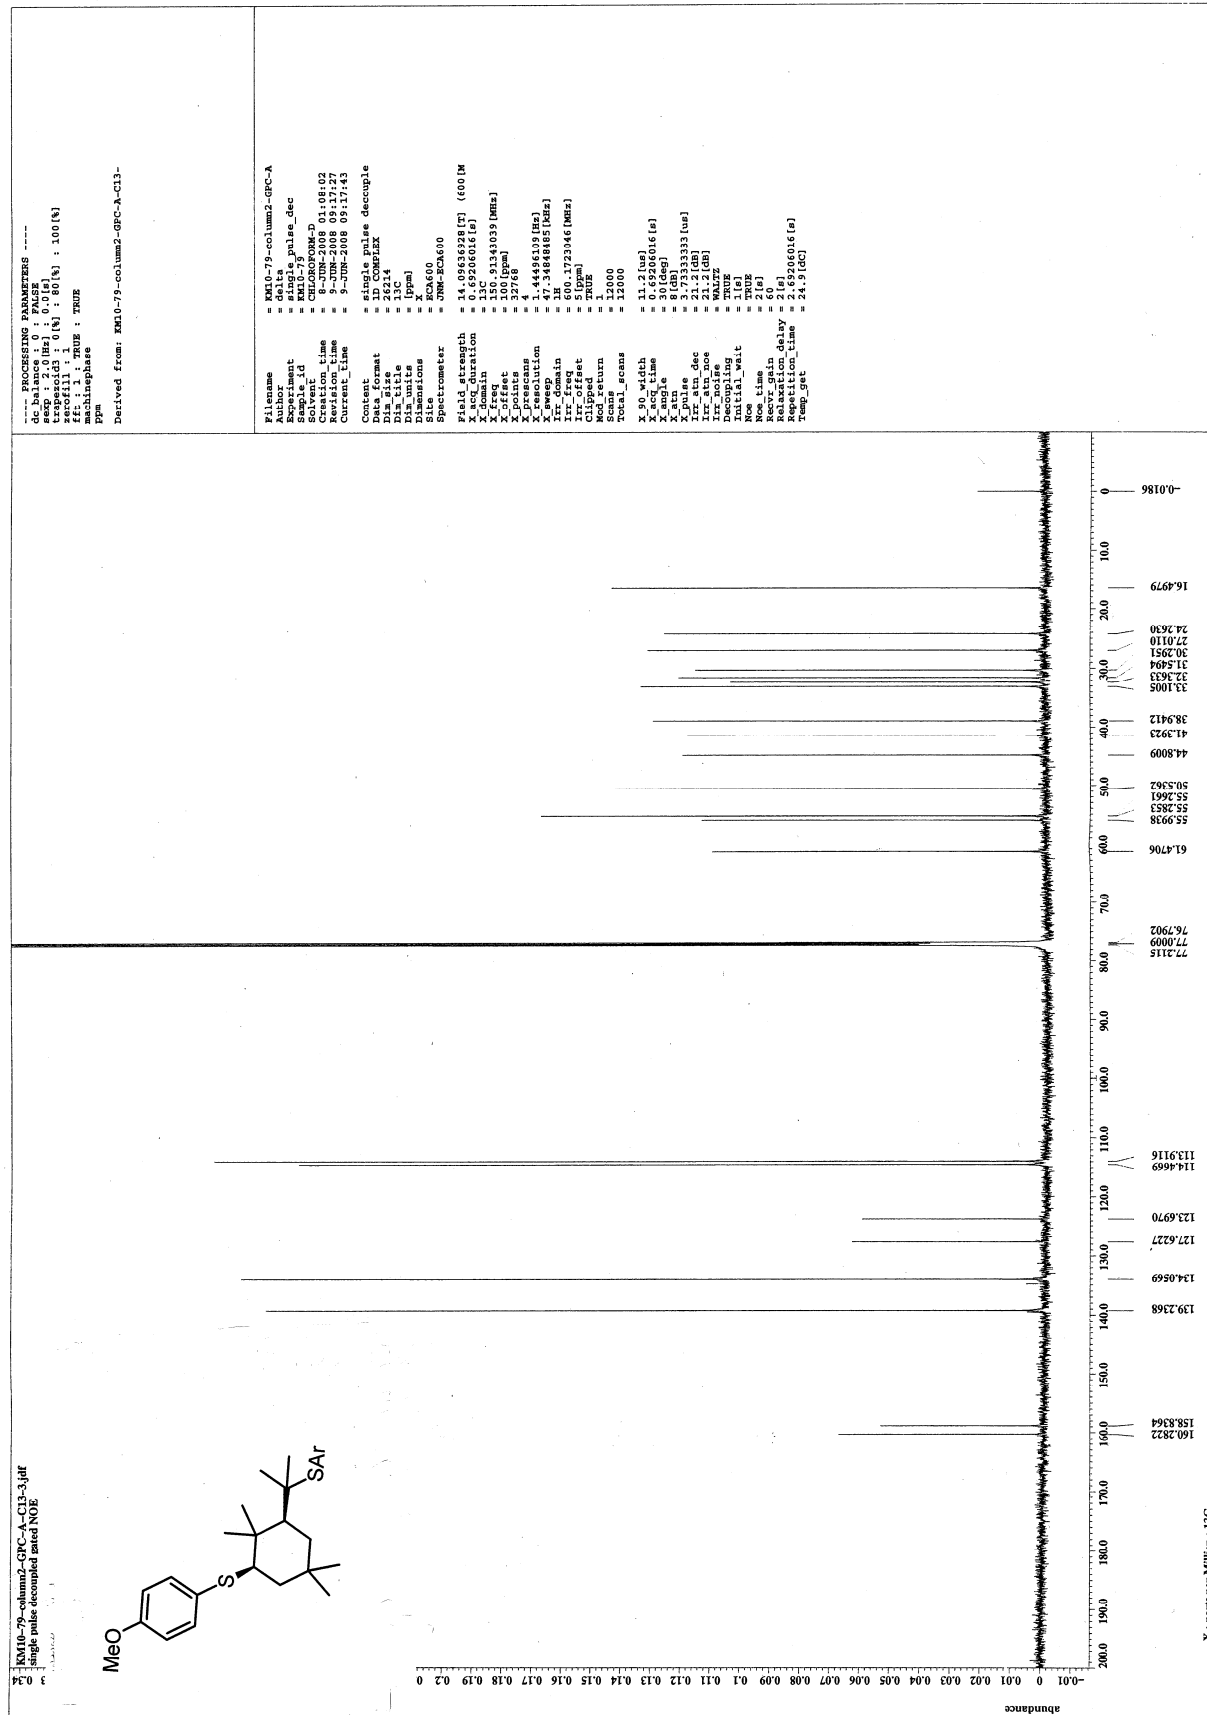

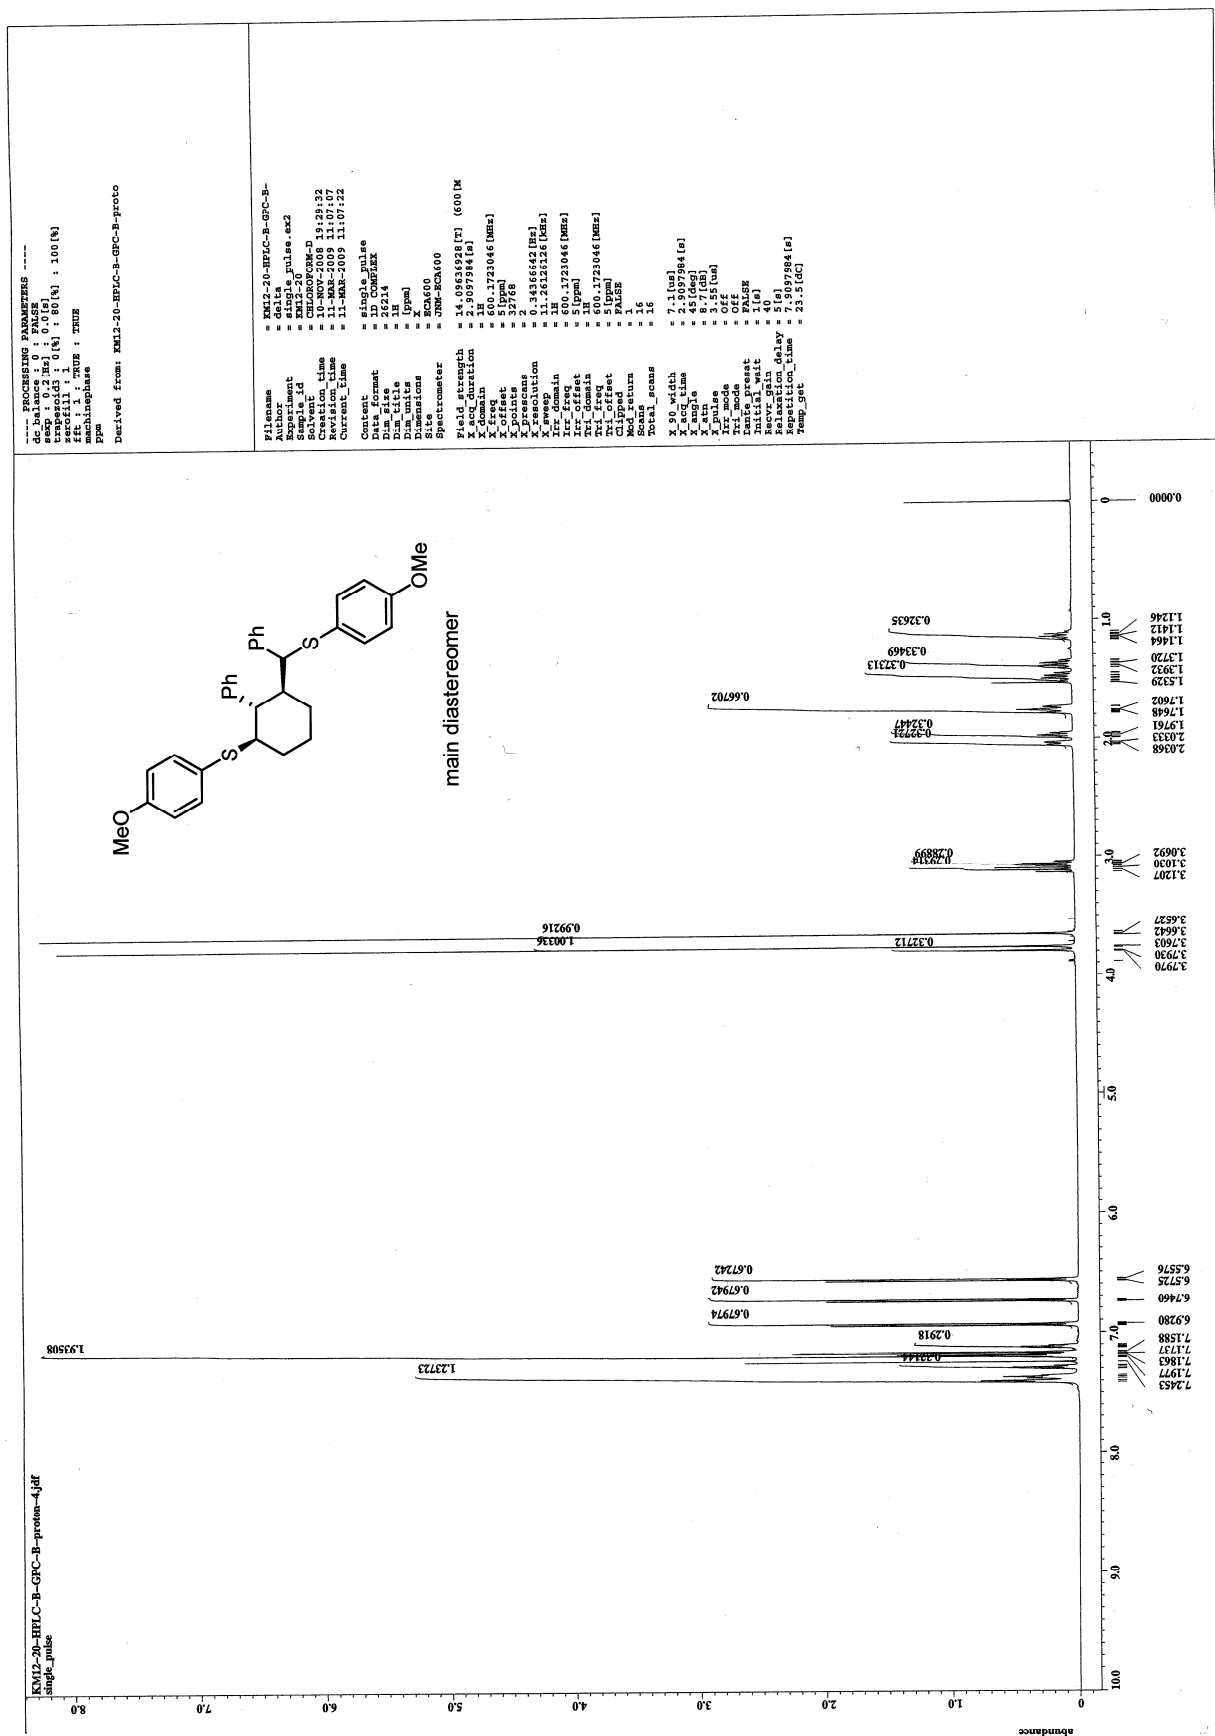







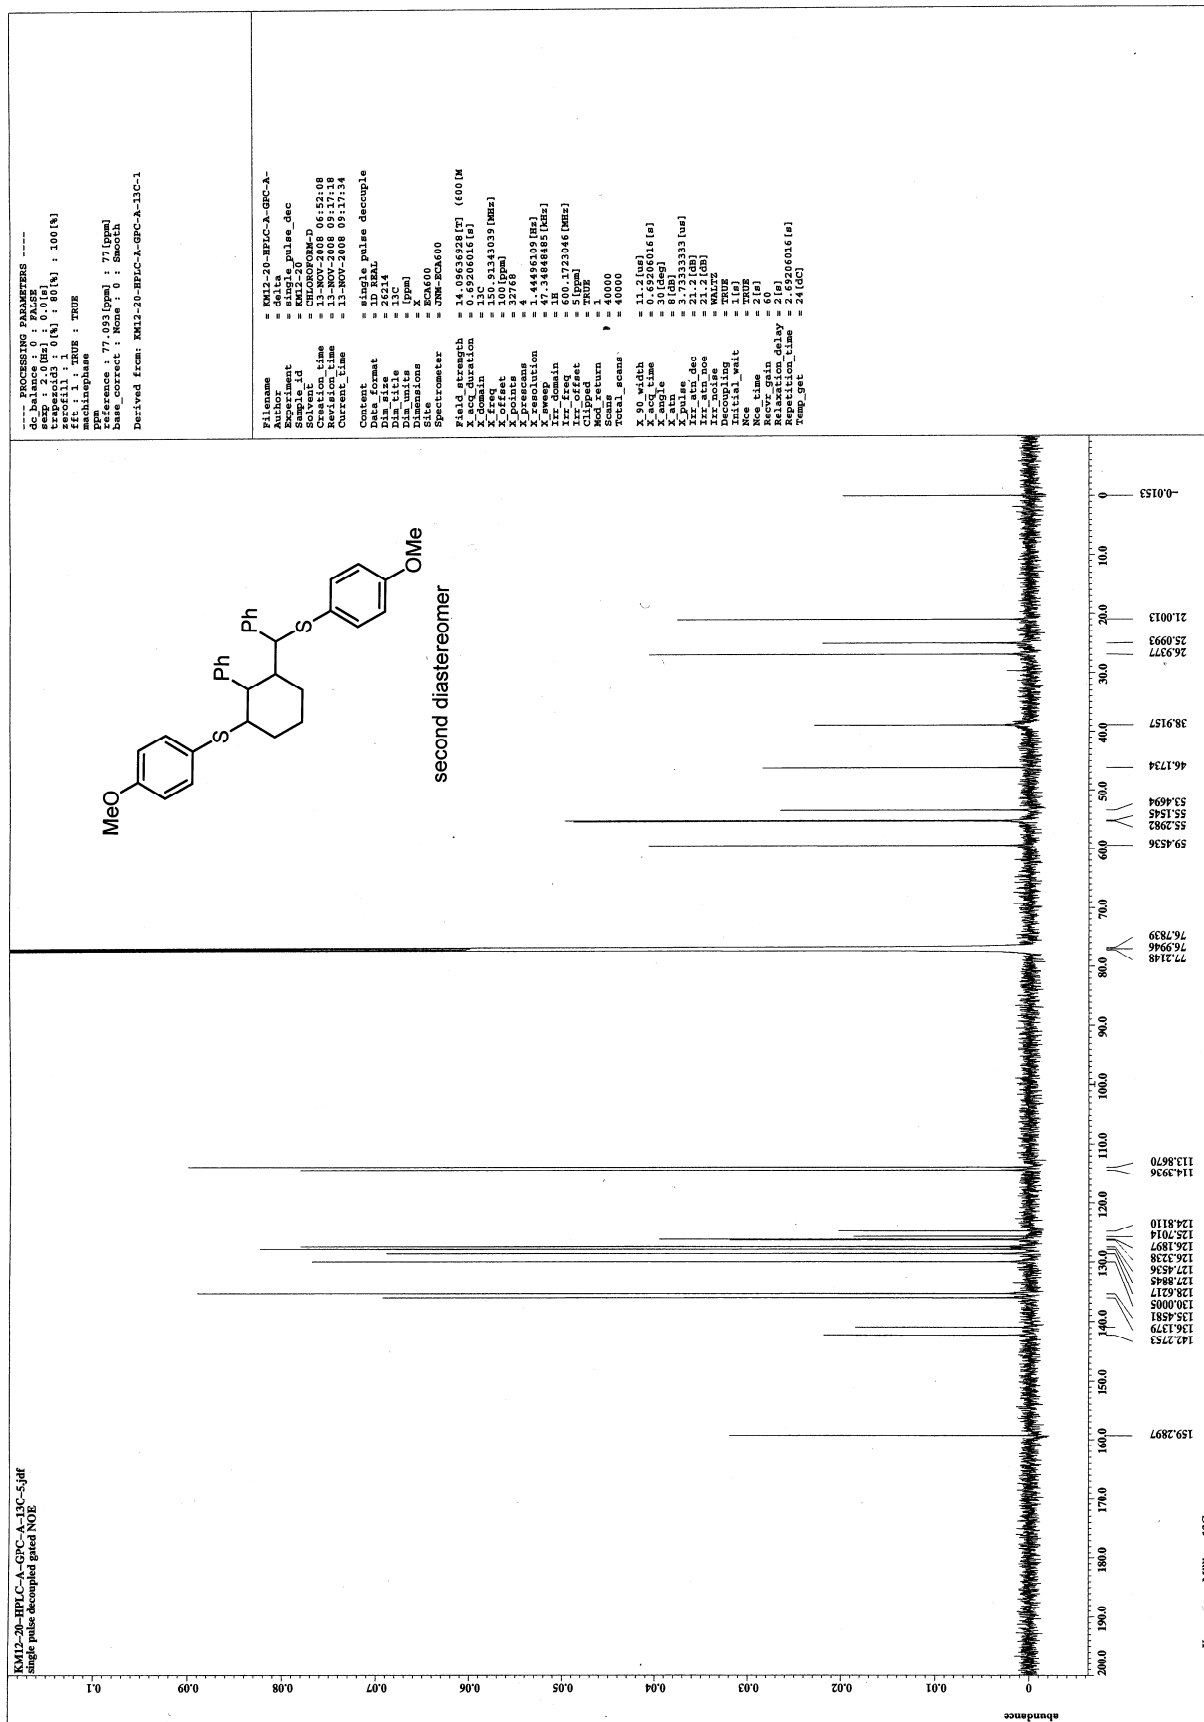

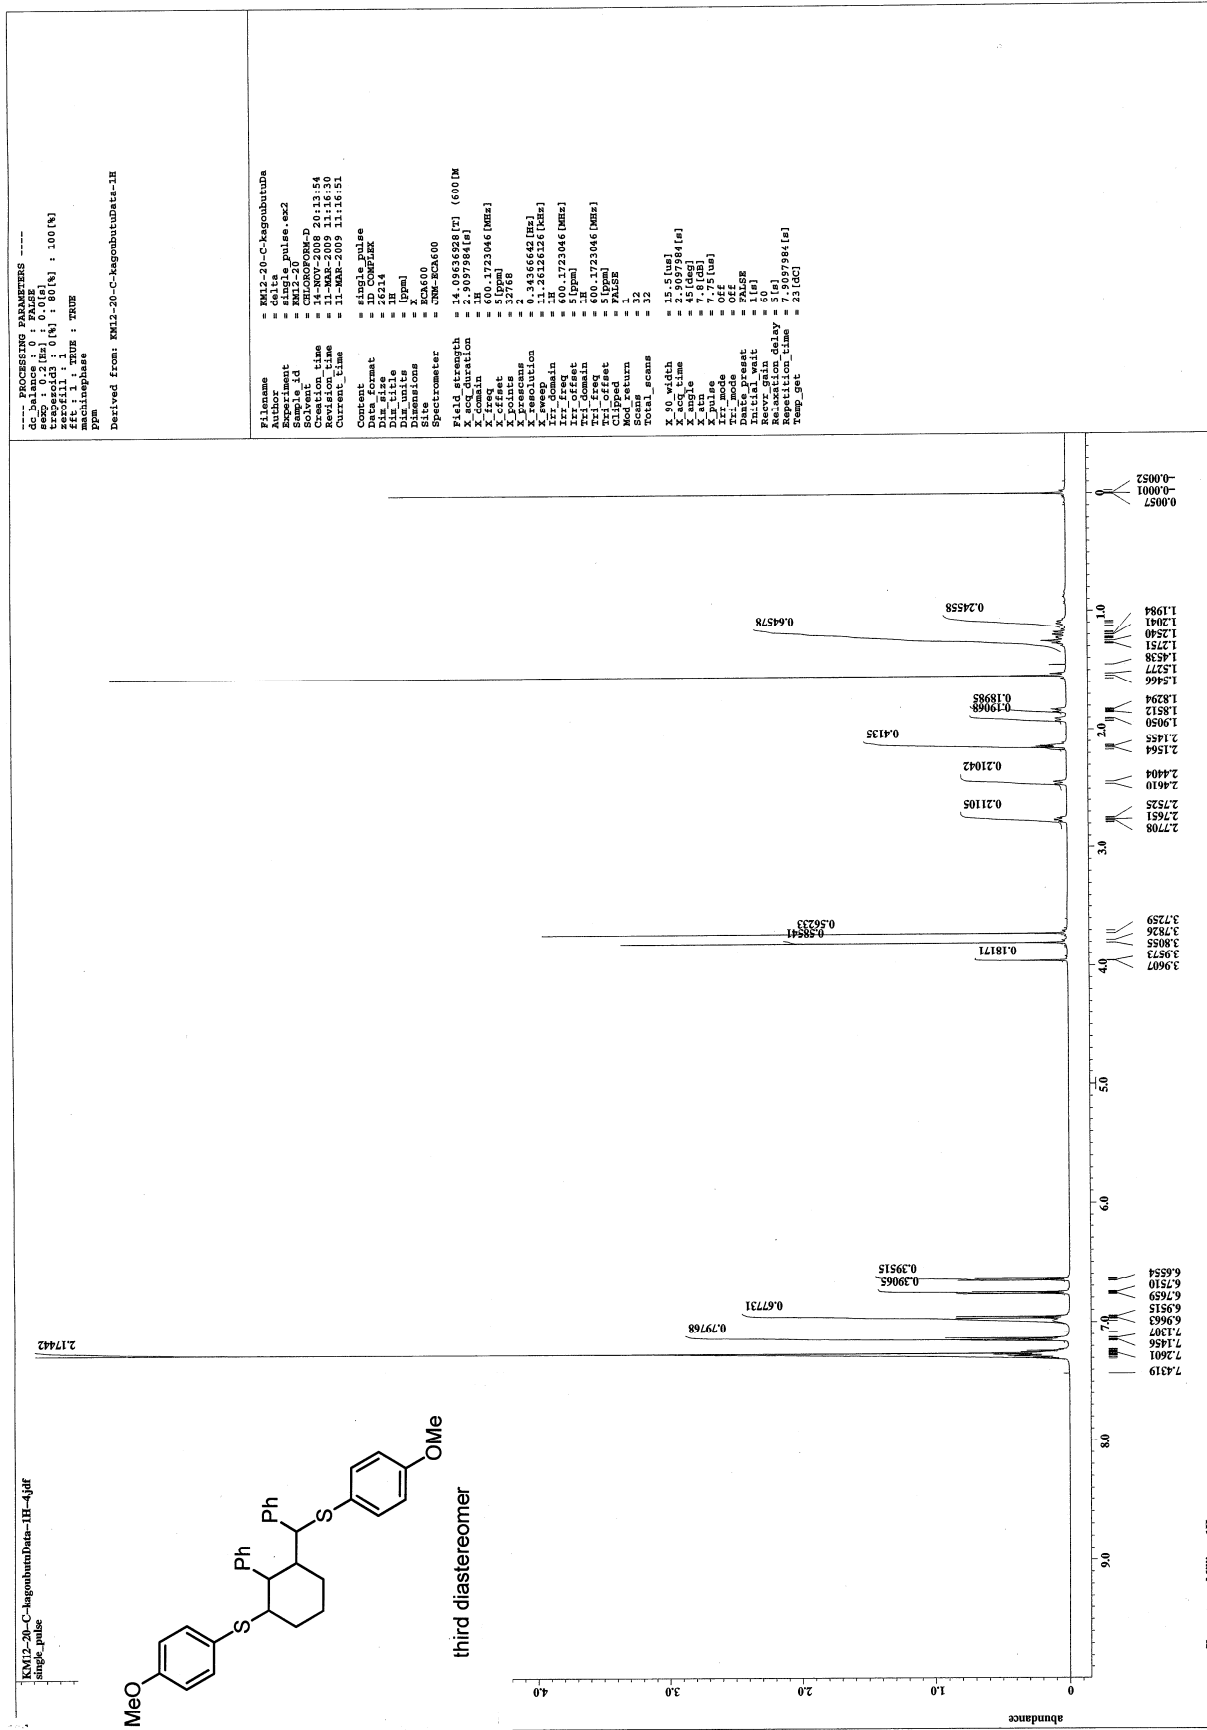

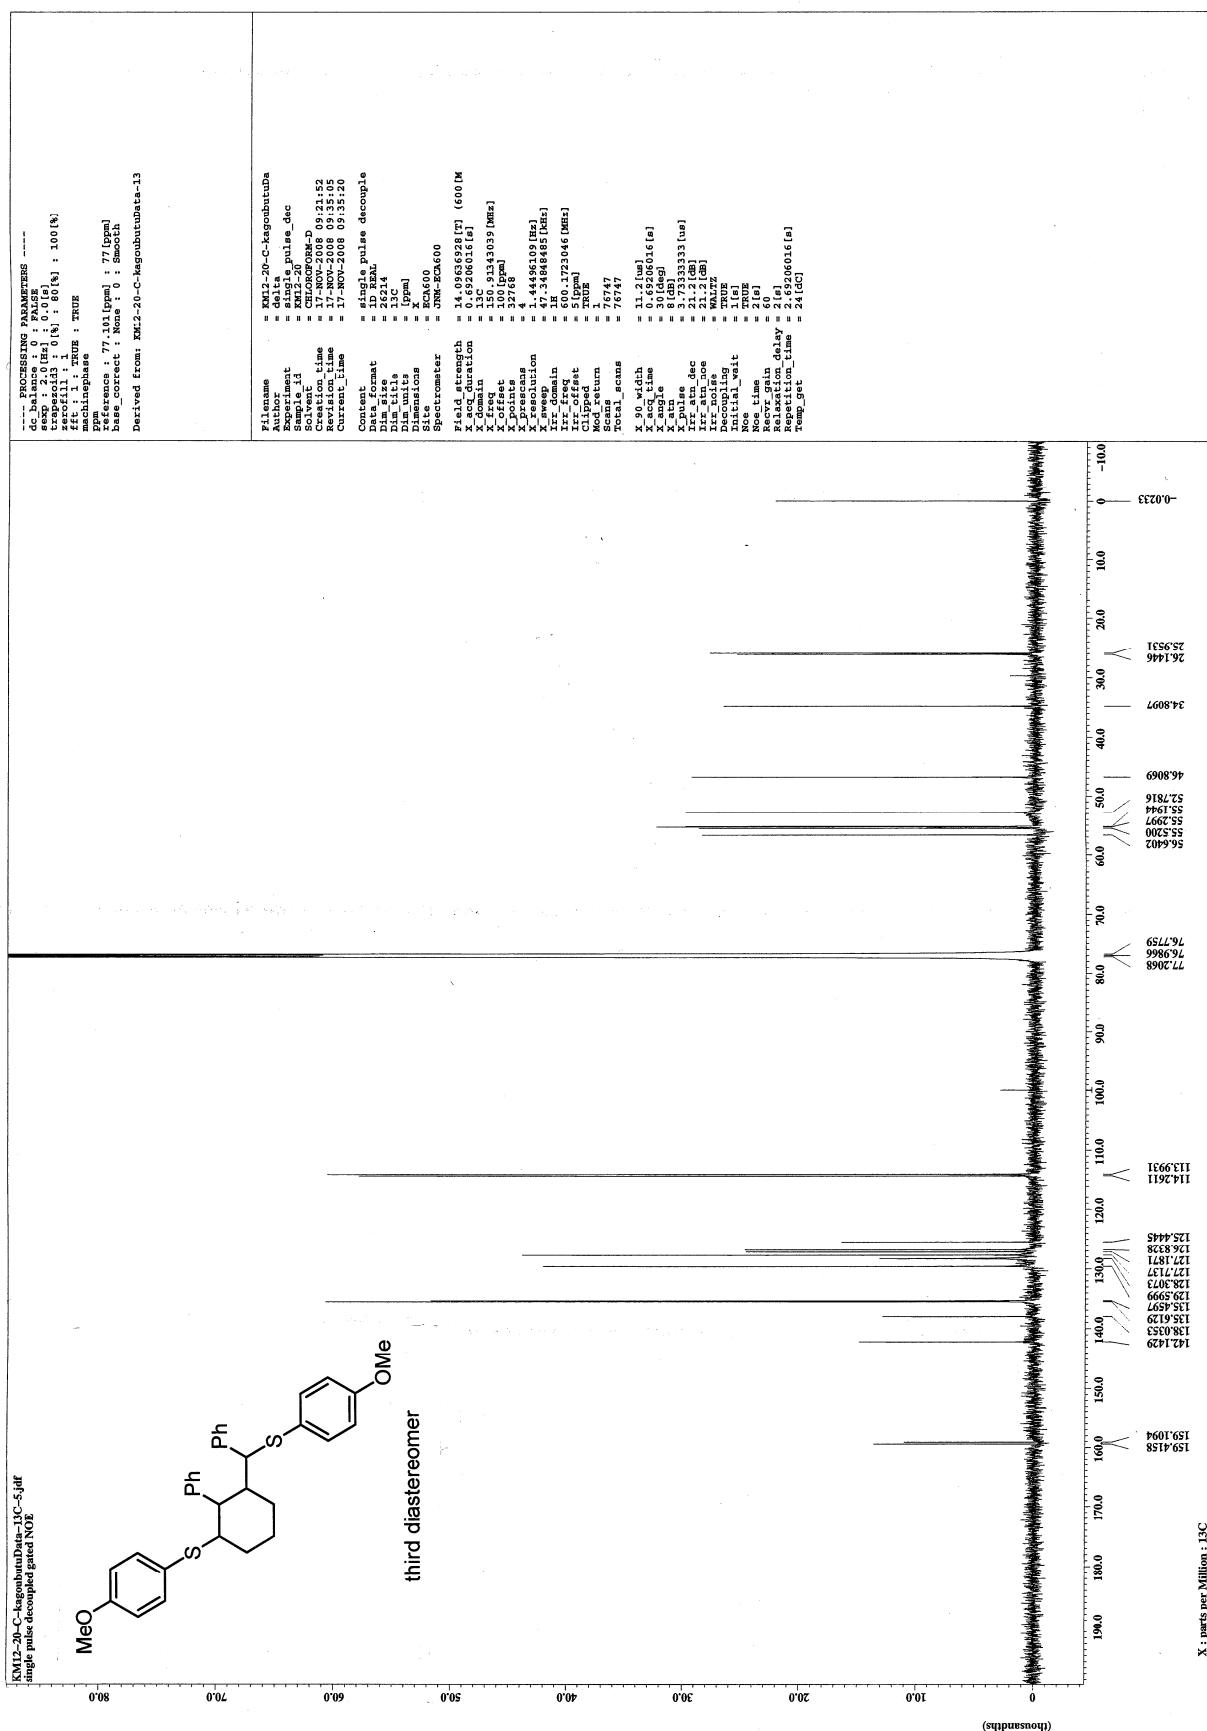



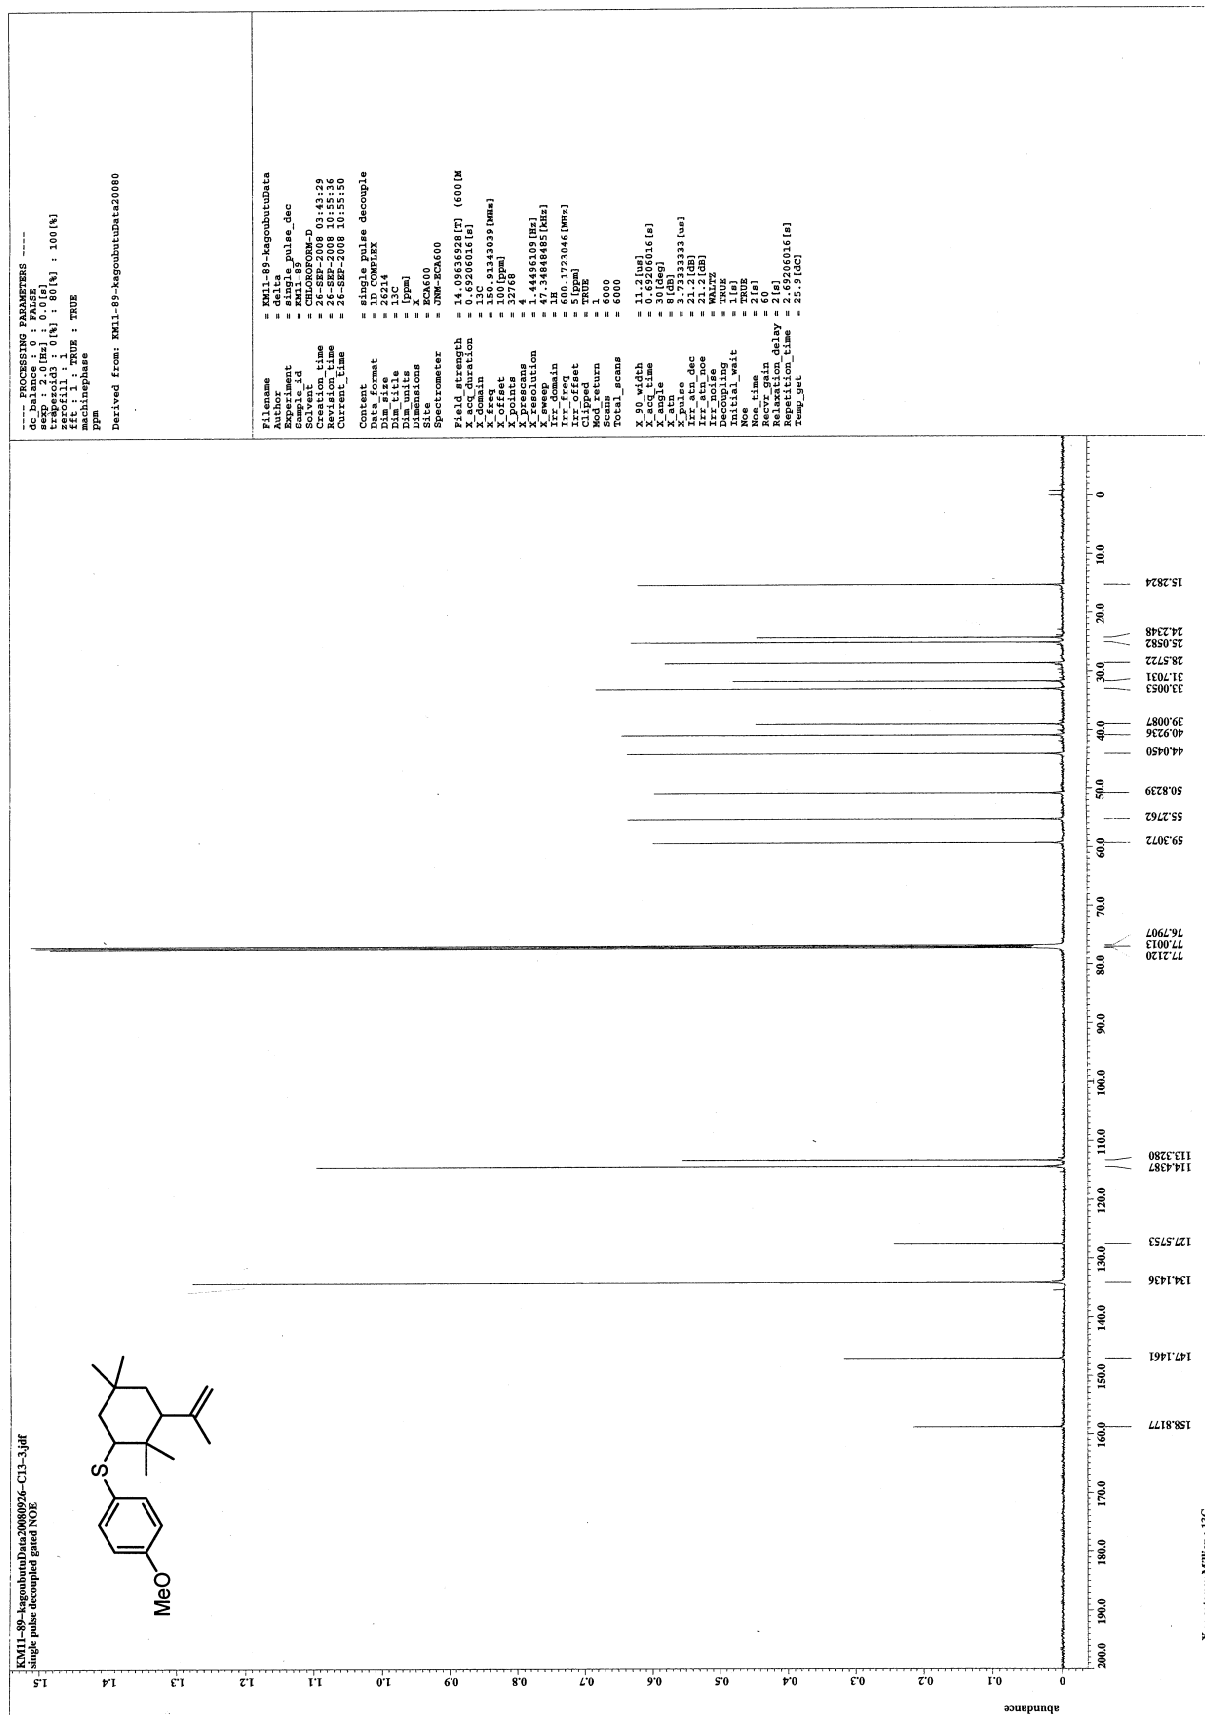

Supplement: b910821a.pdf [file b910821a.pdf]
